# Supplementary material for: Mammographic compression in Asian women
Source: PLoS One. 2017 Apr 18;12(4):e0175781. doi: 10.1371/journal.pone.0175781 (PMC5395189; doi:10.1371/journal.pone.0175781)
Supplement: S1 Data — (XLSX) [file pone.0175781.s001.xlsx]

## Sheet: Clinical
XraySystem	PatID	PatAge	Side	View	ForceDaN	PressKPa	ThickMm	AreaDm2	VolDm3	DensityPercent	DoseMGy
SiemensNovation	PD000001	37	Left	CC	10	90.83	33	0.11	0.062	18.9	0.349
SiemensNovation	PD000001	37	Right	MLO	10.3	33.36	44	0.309	0.084	10.248	0.964
SiemensNovation	PD000001	37	Left	MLO	12.3	42.36	34	0.29	0.091	18.366	1.034
GE	PD000002	48	Right	MLO	5	9.45	43	0.529	0.265	13.649	0.36
GE	PD000002	48	Right	CC	12	51.16	37	0.235	0.138	18.347	0.833
SiemensNovation	PD000002	46	Right	CC	8.4	32.41	35	0.259	0.155	12.207	0.969
SiemensNovation	PD000002	46	Right	MLO	18.5	34.18	31	0.541	0.098	15.14	1.726
SiemensNovation	PD000003	57	Right	MLO	9.4	28.3	13	0.332	0.026	10	0.37
SiemensNovation	PD000003	57	Left	MLO	11.4	30.64	12	0.372	0.041	11.765	0.709
SiemensNovation	PD000003	57	Right	CC	10.1	60.59	13	0.167	0.028	5.511	0.812
SiemensNovation	PD000003	57	Left	CC	8.8	40.57	18	0.217	0.052	11.333	1.213
SiemensNovation	PD000004	55	Right	CC	8	15.39	39	0.52	0.31	6.365	0.38
GE	PD000005	70	Left	CC	14	24.57	63	0.57	0.643	8.808	0.405
GE	PD000005	70	Left	CC	14	22.87	62	0.612	0.675	10.838	1.38
GE	PD000005	70	Left	MLO	15	12.49	65	1.201	0.844	11.422	1.478
SiemensNovation	PD000006	51	Right	CC	5.5	12.4	21	0.443	0.124	4.803	0.434
SiemensNovation	PD000006	51	Left	CC	7.9	17.22	39	0.459	0.281	16.352	1.551
SiemensNovation	PD000006	51	Right	MLO	7.5	11.99	47	0.626	0.341	23.202	1.67
SiemensNovation	PD000006	51	Left	MLO	8	9.96	44	0.803	0.333	18.78	1.695
SiemensNovation	PD000006	51	Right	CC	8.2	20.54	43	0.399	0.295	25.212	1.697
GE	PD000007	78	Right	CC	18	33.03	40	0.545	0.312	11.221	0.435
GE	PD000007	78	Left	MLO	16	18.57	44	0.862	0.355	8.181	1.286
GE	PD000007	78	Right	CC	19	33.7	39	0.564	0.309	13.803	1.336
GE	PD000007	78	Right	MLO	17	18.33	44	0.927	0.435	11.317	1.371
GE	PD000007	78	Left	CC	18	39.8	40	0.452	0.273	7.637	1.956
GE	PD000007	77	Left	CC	18	40.92	43	0.44	0.299	8.573	2.001
GE	PD000007	77	Right	CC	18	35.05	42	0.514	0.321	8.64	2.137
GE	PD000007	77	Right	MLO	16	18.53	48	0.863	0.457	7.596	2.756
GE	PD000007	77	Left	MLO	17	20.42	53	0.833	0.386	5.989	2.849
SiemensNovation	PD000008	65	Left	MLO	6.6	18.86	30	0.35	0.091	13.962	0.896
SiemensNovation	PD000008	65	Right	CC	7.9	24.85	27	0.318	0.126	9.878	0.913
SiemensNovation	PD000008	65	Left	MLO	7.2	11.84	28	0.608	0.165	9.119	0.92
SiemensNovation	PD000008	65	Right	MLO	8.5	14.48	24	0.587	0.118	13.35	1.218
SiemensNovation	PD000008	65	Left	CC	7.9	24.09	27	0.328	0.129	8.983	1.223
SiemensNovation	PD000009	66	Left	MLO	9.5	9.35	29	1.016	0.307	5.051	0.509
SiemensNovation	PD000009	66	Left	CC	11	17.97	28	0.612	0.224	3.938	0.512
SiemensNovation	PD000009	66	Right	MLO	9.5	12.16	32	0.781	0.261	5.254	1.017
SiemensNovation	PD000009	66	Right	CC	10.3	22.04	28	0.467	0.179	4.437	1.019
SiemensNovation	PD000010	66	Left	CC	5.2	39.88	32	0.13	0.082	1.707	0.51
SiemensNovation	PD000010	66	Left	MLO	10.9	22.94	35	0.475	0.09	8.05	0.972
SiemensNovation	PD000010	66	Right	CC	8.7	28.79	31	0.302	0.151	4.044	1.019
SiemensNovation	PD000010	66	Right	MLO	11.4	17.1	39	0.667	0.294	3.68	1.257
SiemensNovation	PD000011	67	Left	CC	5.4	35.36	43	0.153	0.106	10.12	0.523
SiemensNovation	PD000011	67	Right	MLO	6.8	10.98	47	0.619	0.367	6.02	1.129
SiemensNovation	PD000011	67	Left	MLO	12.1	30.64	39	0.395	0.193	7.338	1.211
SiemensNovation	PD000011	67	Right	CC	8.1	30.75	42	0.263	0.204	5.594	1.227
SiemensNovation	PD000012	37	Right	MLO	10.8	32.68	41	0.33	0.113	11.645	0.532
SiemensNovation	PD000012	37	Left	CC	6.4	33.31	47	0.192	0.16	25.702	1.267
SiemensNovation	PD000012	37	Left	MLO	11.2	24.72	40	0.453	0.192	22.486	1.567
SiemensNovation	PD000013	50	Right	MLO	9.9	34.73	39	0.285	0.082	11.212	0.556
SiemensNovation	PD000013	51	Right	MLO	9.5	28.13	36	0.338	0.108	10.567	0.859
GE	PD000014	41	Right	CC	9	63.84	37	0.141	0.106	30.756	0.987
GE	PD000014	41	Right	CC	5	31.66	37	0.158	0.1	31.683	1.07
GE	PD000014	41	Right	MLO	12	21.1	39	0.569	0.18	23.459	1.098
SiemensNovation	PD000015	54	Right	CC	6.7	43.28	36	0.155	0.09	10.687	0.583
SiemensNovation	PD000015	54	Left	MLO	6.2	16.5	42	0.376	0.212	15.799	1.126
SiemensNovation	PD000015	54	Right	MLO	8.3	19.83	40	0.419	0.18	14.807	1.133
SiemensNovation	PD000016	55	Left	CC	9.1	53.51	42	0.17	0.114	9.447	0.592
SiemensNovation	PD000016	55	Left	CC	11	39.75	43	0.277	0.223	21.272	1.424
SiemensNovation	PD000016	55	Left	MLO	18.1	24.35	28	0.743	0.185	14.572	1.736
SiemensNovation	PD000017	39	Left	CC	7.3	32.47	23	0.225	0.077	6.415	0.625
SiemensNovation	PD000017	39	Left	MLO	9.4	22.63	25	0.415	0.104	19.896	1.932
SiemensNovation	PD000018	44	Right	CC	7.6	42.85	48	0.177	0.139	10.399	0.664
SiemensNovation	PD000018	45	Right	CC	8.9	49.6	41	0.179	0.119	10.08	0.882
SiemensNovation	PD000018	44	Right	MLO	11.9	21.99	48	0.541	0.25	12.691	0.96
SiemensNovation	PD000018	44	Left	CC	10	40.44	52	0.247	0.222	9.568	0.998
SiemensNovation	PD000018	45	Left	MLO	7.8	10.92	59	0.714	0.399	6.1	1.144
SiemensNovation	PD000018	45	Left	CC	10.2	46.88	42	0.218	0.154	8.561	1.187
SiemensNovation	PD000018	45	Right	MLO	9	17.61	57	0.511	0.227	13.43	1.289
SiemensNovation	PD000018	44	Left	MLO	13.9	18.66	45	0.745	0.319	6.912	1.62
SiemensNovation	PD000019	58	Right	CC	8.4	71.59	32	0.117	0.08	16.976	0.698
Hologic	PD000019	59	Left	CC	7.7	64.54	32	0.119	0.079	7.493	0.824
Hologic	PD000019	59	Right	CC	10.36	73.34	30	0.141	0.085	11.031	0.846
Hologic	PD000019	59	Right	MLO	9.66	16.52	40	0.585	0.153	9.696	0.966
Hologic	PD000019	59	Left	MLO	8.84	14.78	40	0.598	0.245	8.479	1.023
SiemensNovation	PD000019	58	Left	CC	7.5	63.12	34	0.119	0.087	4.988	1.164
HologicTomo	PD000019	59	Right	CC	10.36	82.28	30	0.126	0.075	9.301	1.165
SiemensNovation	PD000019	58	Left	MLO	10.9	21.35	38	0.51	0.209	8.632	1.183
HologicTomo	PD000019	59	Left	CC	7.7	58.16	32	0.132	0.072	7.906	1.227
HologicTomo	PD000019	59	Right	MLO	9.66	16.66	40	0.58	0.155	7.358	1.476
HologicTomo	PD000019	59	Left	MLO	8.84	15.13	40	0.584	0.252	6.634	1.535
SiemensNovation	PD000019	58	Right	MLO	18.9	29.23	30	0.647	0.12	9.918	2.04
SiemensNovation	PD000020	51	Right	CC	5.9	45.94	33	0.128	0.066	19.637	0.709
SiemensNovation	PD000020	51	Right	MLO	9.8	41.48	31	0.236	0.123	24.312	1.361
SiemensNovation	PD000020	51	Left	CC	7.2	46.59	35	0.155	0.091	20.908	1.396
SiemensNovation	PD000020	51	Left	MLO	8.3	31.9	33	0.26	0.133	20.122	1.415
SiemensNovation	PD000021	64	Left	CC	7.6	15.76	48	0.482	0.382	4.386	0.711
SiemensNovation	PD000021	64	Right	CC	8.9	15.75	47	0.565	0.428	4.634	1.153
SiemensNovation	PD000021	64	Right	MLO	9.2	11.53	56	0.798	0.499	4.301	1.178
Hologic	PD000022	66	Left	MLO	6.77	15.39	27	0.44	0.062	18.409	0.734
Hologic	PD000022	66	Left	CC	8.72	46.82	21	0.186	0.059	23.133	0.812
HologicTomo	PD000022	66	Left	MLO	6.77	15.99	27	0.423	0.068	20.52	1.045
HologicTomo	PD000022	66	Right	MLO	13.59	31.27	20	0.435	0.075	23.951	1.126
HologicTomo	PD000022	66	Left	CC	8.72	47.45	21	0.184	0.059	21.141	1.155
SiemensNovation	PD000023	49	Left	MLO	17	33.71	13	0.504	0.035	12.052	0.727
SiemensNovation	PD000023	49	Right	CC	6.8	39.29	22	0.173	0.059	18.453	1.192
SiemensNovation	PD000023	49	Left	CC	6.8	39.39	23	0.173	0.063	8.702	1.253
SiemensNovation	PD000023	49	Right	MLO	10.7	28.78	22	0.372	0.054	16.09	1.531
GE	PD000024	67	Right	MLO	11	15.49	47	0.71	0.507	7.462	0.729
GE	PD000024	67	Left	MLO	15	12.55	52	1.195	0.657	6.955	0.812
GE	PD000024	67	Right	MLO	13	13.29	49	0.978	0.573	5.962	0.904
GE	PD000024	67	Right	CC	7	15.26	54	0.459	0.408	6.215	1.006
GE	PD000024	67	Left	CC	10	17.06	54	0.586	0.522	6.557	1.019
SiemensNovation	PD000025	59	Left	MLO	12.3	44.09	34	0.279	0.112	10.838	0.746
SiemensNovation	PD000025	59	Left	CC	14.5	125.03	12	0.116	0.022	9.841	0.948
SiemensNovation	PD000025	59	Right	CC	8.2	34.95	42	0.235	0.17	4.651	1.241
SiemensNovation	PD000025	59	Right	MLO	14.4	23.49	46	0.613	0.309	10.427	1.435
Hologic	PD000026	42	Right	CC	10.81	39.03	16	0.277	0.057	22.876	0.747
Hologic	PD000026	42	Left	CC	4.17	20.17	19	0.207	0.057	13.739	0.91
Hologic	PD000026	42	Left	MLO	11.96	21.66	22	0.552	0.091	30.378	1.069
Hologic	PD000026	42	Right	MLO	16.84	29.68	20	0.567	0.079	17.585	1.121
GE	PD000026	40	Right	MLO	14	26.49	36	0.529	0.156	14.388	2.095
GE	PD000026	40	Left	MLO	12	21.82	36	0.55	0.157	13.135	2.212
GE	PD000026	40	Left	CC	6	37.89	31	0.158	0.084	25.178	2.435
GE	PD000026	40	Right	CC	6	30.75	29	0.195	0.092	11.588	2.985
GE	PD000027	73	Left	CC	11	65.1	17	0.169	0.038	12.365	0.748
GE	PD000027	73	Left	MLO	14	38.53	25	0.363	0.075	19.421	1.029
GE	PD000027	73	Right	CC	3	15.92	92	0.188	0.33	19.84	1.888
GE	PD000027	73	Right	MLO	4	13.73	76	0.291	0.377	22.12	2.022
SiemensNovation	PD000028	45	Right	MLO	7.3	23.03	85	0.317	0.255	13.413	0.757
SiemensNovation	PD000028	46	Left	CC	7	50	48	0.14	0.115	20.43	0.908
SiemensNovation	PD000028	45	Right	MLO	7.2	29.68	44	0.243	0.177	14.579	1.205
SiemensNovation	PD000028	46	Left	MLO	8	22.6	46	0.354	0.194	17.733	1.344
SiemensNovation	PD000028	45	Right	MLO	11.8	34.23	43	0.345	0.137	21.266	1.625
SiemensNovation	PD000028	45	Right	MLO	11.8	34.23	43	0.345	0.137	21.266	1.625
GE	PD000028	46	Right	CC	6	49.78	40	0.121	0.078	15.914	2.214
GE	PD000028	46	Left	CC	4	41.09	44	0.097	0.079	20.18	2.299
GE	PD000028	46	Right	MLO	10	23.65	44	0.423	0.158	12.727	2.405
GE	PD000028	46	Left	MLO	11	21.41	53	0.514	0.219	14.862	2.861
GE	PD000029	66	Left	CC	4	23.25	36	0.172	0.094	17.561	0.762
GE	PD000029	66	Right	CC	6	24.07	51	0.249	0.208	24.128	1.082
GE	PD000029	66	Left	MLO	10	17.5	45	0.571	0.232	18.516	1.162
GE	PD000029	66	Right	MLO	11	15.9	52	0.692	0.321	12.579	1.395
SiemensNovation	PD000030	40	Right	CC	6.3	36.83	31	0.171	0.084	9.417	0.763
SiemensNovation	PD000030	41	Right	CC	7.2	37.39	28	0.193	0.079	8.087	0.917
SiemensNovation	PD000030	41	Left	CC	7.3	16.43	42	0.444	0.308	22.268	1.373
SiemensNovation	PD000030	40	Left	CC	7.8	16.67	42	0.468	0.318	22.999	1.652
SiemensNovation	PD000030	40	Left	MLO	11.1	13.07	35	0.849	0.31	24.215	1.836
SiemensNovation	PD000030	41	Left	MLO	7.9	9.13	41	0.865	0.375	18.407	1.96
SiemensNovation	PD000031	57	Left	CC	7.5	21.24	46	0.353	0.301	3.905	0.768
SiemensNovation	PD000031	57	Right	CC	8.7	24.31	46	0.358	0.303	3.801	1.156
SiemensNovation	PD000031	57	Left	MLO	15.4	18.54	33	0.831	0.3	8.577	1.546
SiemensNovation	PD000031	57	Right	MLO	12.2	15.53	35	0.786	0.302	8.908	1.546
Hologic	PD000032	63	Left	MLO	10.71	22.49	38	0.476	0.157	17.364	0.77
Hologic	PD000032	63	Right	MLO	10.4	21.1	38	0.493	0.172	11.112	0.858
Hologic	PD000032	63	Right	CC	7.8	42.92	34	0.182	0.105	16.436	0.963
Hologic	PD000032	63	Left	CC	7.97	49.66	35	0.16	0.097	13.484	1.044
HologicTomo	PD000032	63	Left	MLO	10.71	21.7	38	0.494	0.158	14.955	1.301
HologicTomo	PD000032	63	Right	CC	7.8	43.34	34	0.18	0.104	10.127	1.327
HologicTomo	PD000032	63	Right	MLO	10.4	19.97	38	0.521	0.178	10.867	1.341
HologicTomo	PD000032	63	Left	CC	7.97	55.04	35	0.145	0.09	9.95	1.408
SiemensNovation	PD000033	66	Left	CC	7.5	2.71	34	2.771	1.101	1.46	0.775
SiemensNovation	PD000033	66	Left	MLO	9.6	26.91	42	0.357	0.162	19.67	1.355
GE	PD000033	67	Right	MLO	16	32.98	49	0.485	0.197	14.301	1.403
GE	PD000033	67	Right	MLO	16	32.98	49	0.485	0.197	14.301	1.403
SiemensNovation	PD000033	66	Right	MLO	15.4	42.29	34	0.364	0.121	15.899	1.432
GE	PD000033	67	Right	CC	14	106.61	25	0.131	0.052	21.753	1.799
GE	PD000033	67	Right	CC	14	106.61	25	0.131	0.052	21.753	1.799
Hologic	PD000034	73	Left	MLO	7.695	9.22	26	0.835	0.212	12.718	0.778
Hologic	PD000034	73	Left	CC	6.272	14.51	24	0.432	0.137	15.746	0.971
Hologic	PD000034	73	Right	MLO	10.72	11.21	25	0.956	0.189	21.967	0.981
Hologic	PD000034	73	Right	CC	6.984	13.8	25	0.506	0.165	19.343	0.983
SiemensNovation	PD000035	67	Right	MLO	9.2	13.75	32	0.669	0.225	6.43	0.782
SiemensNovation	PD000035	67	Left	CC	7.6	30.1	33	0.252	0.15	5.993	1.18
SiemensNovation	PD000035	67	Left	MLO	10.8	16.71	31	0.646	0.227	5.45	1.181
SiemensNovation	PD000035	67	Right	CC	8.8	38.93	30	0.226	0.114	5.435	1.255
SiemensNovation	PD000036	75	Left	CC	8.3	32.91	32	0.252	0.138	5.995	0.783
SiemensNovation	PD000036	75	Left	MLO	6.3	11.55	41	0.545	0.257	6.466	1.229
GE	PD000037	39	Right	CC	10	58.96	27	0.17	0.076	19.382	0.784
GE	PD000037	39	Left	CC	11	58.91	26	0.187	0.078	18.279	0.787
GE	PD000037	39	Right	MLO	16	34.06	43	0.47	0.139	13.055	0.941
GE	PD000037	39	Left	MLO	14	26.37	36	0.531	0.099	14.711	0.943
GE	PD000037	39	Right	MLO	17	37.18	45	0.457	0.16	12.871	1.008
GE	PD000038	45	Right	MLO	10	20.91	38	0.478	0.13	19.759	0.784
SiemensNovation	PD000038	43	Right	CC	5.3	37.45	29	0.142	0.07	18.166	0.824
GE	PD000038	45	Right	CC	5	28.77	26	0.174	0.072	22.716	0.994
GE	PD000038	45	Left	MLO	13	15.64	41	0.831	0.18	17.239	1.027
GE	PD000038	45	Left	CC	10	31.87	36	0.314	0.179	21.892	1.042
SiemensNovation	PD000038	43	Right	MLO	8.6	20.38	44	0.422	0.141	12.833	1.212
SiemensNovation	PD000038	43	Left	CC	9.3	35.68	36	0.261	0.171	23.676	1.303
SiemensNovation	PD000038	43	Left	MLO	16.6	20.3	25	0.818	0.131	20.535	2.308
SiemensNovation	PD000039	65	Right	MLO	8.1	9.32	34	0.869	0.287	6.136	0.786
SiemensNovation	PD000039	65	Right	CC	8	15.77	34	0.507	0.25	4.416	0.795
SiemensNovation	PD000039	65	Left	MLO	7.8	9.89	35	0.789	0.296	7.013	1.175
SiemensNovation	PD000039	65	Left	CC	7.2	14.16	35	0.508	0.26	6.32	1.176
SiemensNovation	PD000041	70	Right	CC	5.3	28.33	43	0.187	0.143	9.061	0.787
SiemensNovation	PD000041	70	Left	CC	12.8	53.44	32	0.24	0.132	19.893	1.041
SiemensNovation	PD000041	70	Left	MLO	21	27.94	37	0.752	0.152	8.594	1.705
SiemensNovation	PD000041	70	Right	MLO	19.3	28.76	36	0.671	0.238	9.845	1.766
GE	PD000042	41	Right	CC	7	34.13	29	0.205	0.092	10.654	0.788
GE	PD000042	41	Right	MLO	8	18.69	37	0.428	0.176	16.516	1.053
GE	PD000042	40	Right	CC	10	44.42	39	0.225	0.143	10.465	2.405
GE	PD000042	40	Left	CC	5	22.72	31	0.22	0.104	12.891	2.767
GE	PD000042	40	Right	MLO	14	33	43	0.424	0.17	15.434	4.028
Hologic	PD000043	71	Left	MLO	12.99	12.19	26	1.065	0.202	7.706	0.79
Hologic	PD000043	71	Right	CC	10.76	22.23	25	0.484	0.16	8.343	0.845
Hologic	PD000043	71	Right	MLO	11.53	12.49	25	0.923	0.169	12.509	0.853
Hologic	PD000043	71	Left	CC	9.35	18.83	24	0.497	0.156	8.087	0.881
HologicTomo	PD000043	71	Left	MLO	12.99	12.16	26	1.068	0.203	9.968	1.134
HologicTomo	PD000043	71	Left	CC	9.35	23.15	24	0.404	0.133	10.835	1.182
HologicTomo	PD000043	71	Right	CC	10.76	26.45	25	0.407	0.14	10.333	1.304
HologicTomo	PD000043	71	Right	MLO	11.53	12.69	25	0.909	0.167	6.945	1.35
SiemensNovation	PD000044	44	Right	CC	6.8	35.44	41	0.192	0.126	10.197	0.794
SiemensNovation	PD000044	45	Right	CC	5.4	28.48	45	0.19	0.143	9.175	1.059
SiemensNovation	PD000044	44	Right	MLO	15.8	24.57	38	0.643	0.203	12.458	1.529
SiemensNovation	PD000044	45	Right	MLO	14.5	24.92	44	0.582	0.21	9.727	1.764
SiemensNovation	PD000045	64	Left	MLO	15.5	24.09	38	0.643	0.248	9.105	0.795
SiemensNovation	PD000045	64	Left	CC	13.8	41.24	32	0.335	0.17	8.157	0.987
SiemensNovation	PD000046	74	Right	CC	7.8	10.36	32	0.753	0.318	4.313	0.797
SiemensNovation	PD000046	74	Left	CC	7.4	9.29	33	0.796	0.348	3.514	0.801
SiemensNovation	PD000046	74	Left	MLO	8	6.88	43	1.163	0.54	3.192	1.127
SiemensNovation	PD000046	74	Right	MLO	8	9.1	47	0.88	0.482	3.434	1.157
GE	PD000047	62	Right	MLO	14	29.64	43	0.472	0.132	10.423	0.797
GE	PD000047	62	Left	CC	16	83.88	24	0.191	0.068	8.94	1.079
GE	PD000047	62	Left	MLO	13	31.24	38	0.416	0.112	12.229	1.147
GE	PD000047	62	Right	CC	8	46.04	25	0.174	0.068	15.79	1.401
SiemensNovation	PD000048	47	Left	MLO	8.6	23.94	19	0.359	0.061	14.747	0.798
SiemensNovation	PD000048	47	Left	CC	8.6	57.31	24	0.15	0.066	19.413	1.557
SiemensNovation	PD000048	47	Right	MLO	11.1	22.72	23	0.488	0.061	12.643	1.564
SiemensNovation	PD000048	47	Right	CC	6.5	48.11	24	0.135	0.062	18.09	1.578
SiemensNovation	PD000049	79	Right	CC	7.4	17.43	32	0.425	0.199	4.29	0.799
SiemensNovation	PD000049	79	Right	MLO	15	16.1	30	0.932	0.265	5.306	1.58
GE	PD000050	54	Left	CC	16	30.38	36	0.527	0.266	17.922	0.799
GE	PD000050	54	Right	MLO	15	16.74	37	0.896	0.287	17.699	0.801
GE	PD000050	54	Right	CC	14	37.99	32	0.369	0.17	16.64	1.004
GE	PD000050	54	Left	MLO	16	15.76	40	1.015	0.313	14.191	1.022
GE	PD000051	45	Left	CC	7	52.51	37	0.133	0.101	21.59	0.8
GE	PD000051	45	Left	MLO	14	21.31	36	0.657	0.129	16.463	0.803
GE	PD000051	45	Right	MLO	12	18.47	37	0.65	0.131	11.654	0.987
GE	PD000051	45	Right	CC	4	21.03	38	0.19	0.116	20.911	1.095
GE	PD000051	45	Left	CC	7	42.35	38	0.165	0.122	21.601	1.104
GE	PD000051	45	Left	MLO	11	17.42	47	0.631	0.188	8.878	1.159
Hologic	PD000052	58	Left	CC	11.88	34.8	23	0.341	0.108	14.763	0.801
Hologic	PD000052	58	Left	MLO	17.84	20.59	24	0.867	0.212	16.031	0.93
GE	PD000053	49	Left	CC	14	61.38	38	0.228	0.139	16.897	0.801
GE	PD000053	49	Right	CC	7	33.14	38	0.211	0.128	17.38	0.892
GE	PD000053	49	Left	MLO	13	20.34	42	0.639	0.236	14.585	1.109
GE	PD000053	49	Right	MLO	15	21.94	46	0.684	0.23	14.579	1.141
Hologic	PD000054	49	Right	MLO	15.302	33.66	26	0.455	0.082	28.3	0.806
Hologic	PD000054	49	Left	CC	3.692	29.46	22	0.125	0.047	17.323	0.837
SiemensNovation	PD000054	47	Left	CC	10.2	71.6	14	0.142	0.027	30.119	1.325
SiemensNovation	PD000054	47	Right	MLO	11.7	32.49	13	0.36	0.032	22.532	1.325
GE	PD000055	64	Right	CC	17	27.65	43	0.615	0.391	9.677	0.81
GE	PD000055	64	Left	CC	11	23.8	43	0.462	0.314	14.704	0.995
GE	PD000055	64	Right	MLO	18	14.26	60	1.262	0.761	8.68	1.142
GE	PD000055	64	Right	MLO	17	14.09	70	1.206	0.922	5.333	1.208
GE	PD000055	64	Left	MLO	18	17.87	69	1.008	0.712	9.693	1.3
SiemensNovation	PD000056	73	Right	CC	10.1	67.35	27	0.15	0.064	20.048	0.813
SiemensNovation	PD000056	73	Left	CC	9.5	52.96	26	0.179	0.073	14.424	0.861
SiemensNovation	PD000056	73	Right	MLO	9.9	20.27	28	0.489	0.165	16.275	1.154
SiemensNovation	PD000056	73	Left	MLO	15	26.61	20	0.564	0.109	13.772	1.191
SiemensNovation	PD000057	46	Right	CC	5.5	34.56	36	0.159	0.093	18.847	0.817
SiemensNovation	PD000057	46	Left	CC	7.5	30.01	37	0.25	0.159	18.053	1.103
SiemensNovation	PD000057	46	Left	MLO	8.9	15.75	36	0.565	0.185	17.15	1.113
SiemensNovation	PD000057	46	Right	MLO	8.6	16.49	39	0.522	0.237	17.523	1.126
GE	PD000058	70	Left	MLO	15	10.93	49	1.372	0.735	3.836	0.82
GE	PD000058	70	Left	CC	11	9.23	35	1.192	0.509	4.262	1.186
SiemensNovation	PD000059	71	Left	CC	10.2	4.78	38	2.133	0.983	7.411	0.822
SiemensNovation	PD000059	71	Right	CC	13.2	6.74	43	1.959	1.072	6.7	1.491
SiemensNovation	PD000059	71	Left	MLO	13.4	6.46	42	2.075	0.936	7.489	1.639
SiemensNovation	PD000059	71	Right	MLO	11.5	4.92	55	2.337	1.276	6.612	1.748
SiemensNovation	PD000060	74	Left	MLO	11.1	28.75	42	0.386	0.178	6.34	0.823
SiemensNovation	PD000060	74	Left	MLO	10.9	5.74	45	1.899	0.984	5.9	1.493
SiemensNovation	PD000060	74	Left	CC	18	13.68	44	1.316	0.784	5.216	1.495
SiemensNovation	PD000060	74	Right	CC	11	10.09	46	1.09	0.715	5.939	1.518
SiemensNovation	PD000060	74	Right	MLO	10.9	5.97	47	1.827	0.849	5.45	1.524
GE	PD000061	58	Left	CC	5	27.16	36	0.184	0.1	13.17	0.825
GE	PD000061	58	Left	MLO	17	27.15	55	0.626	0.276	11.732	1.054
GE	PD000061	58	Right	CC	6	28.46	37	0.211	0.119	14.029	1.062
GE	PD000061	58	Right	MLO	17	21.48	61	0.791	0.42	7.361	1.129
SiemensNovation	PD000062	61	Left	CC	11.7	9.63	37	1.215	0.576	6.282	0.825
SiemensNovation	PD000062	61	Right	CC	12.1	9.69	39	1.248	0.635	8.531	1.221
SiemensNovation	PD000062	61	Left	MLO	15.3	11.04	49	1.386	0.637	4.574	1.41
SiemensNovation	PD000062	61	Right	MLO	13.7	9.72	52	1.41	0.699	4.802	1.757
SiemensNovation	PD000063	67	Left	CC	8.3	11.16	38	0.743	0.398	6.193	0.828
SiemensNovation	PD000063	67	Right	CC	13.2	7.45	43	1.772	0.97	5.287	1.122
SiemensNovation	PD000063	67	Left	MLO	9.7	6.53	51	1.485	0.818	5.626	1.753
SiemensNovation	PD000063	67	Right	MLO	17.1	8.27	46	2.068	1.076	4.602	1.919
GE	PD000064	78	Right	MLO	17	15.79	48	1.077	0.411	6.507	0.829
GE	PD000064	78	Right	MLO	18	16.4	46	1.097	0.36	5.23	0.885
GE	PD000064	78	Right	CC	12	20.42	37	0.588	0.3	9.948	1.06
GE	PD000064	78	Left	CC	10	19.63	38	0.509	0.28	9.869	1.078
GE	PD000064	78	Left	MLO	16	14.55	42	1.099	0.277	3.751	1.383
GE	PD000064	76	Right	CC	12	24.44	38	0.491	0.274	4.116	1.816
GE	PD000064	76	Left	CC	12	24.94	41	0.481	0.306	3.79	2.039
GE	PD000064	76	Right	MLO	16	14.47	50	1.106	0.387	3.719	2.367
GE	PD000064	76	Left	MLO	14	12.89	47	1.086	0.285	3.536	2.368
SiemensNovation	PD000065	52	Left	CC	12.8	28.49	41	0.449	0.299	6.101	0.83
GE	PD000065	53	Left	MLO	17	20.5	57	0.829	0.383	10.53	1.068
SiemensNovation	PD000065	52	Left	MLO	14.5	21.05	39	0.689	0.341	16.302	1.152
GE	PD000065	53	Left	CC	18	39.24	47	0.459	0.351	12.432	1.233
SiemensNovation	PD000066	77	Left	CC	9.6	21.97	38	0.437	0.265	4.446	0.83
SiemensNovation	PD000066	77	Right	CC	6.8	15.9	50	0.428	0.375	3.303	1.065
SiemensNovation	PD000066	77	Right	MLO	16.7	18.69	40	0.893	0.37	4.433	1.25
SiemensNovation	PD000066	77	Left	MLO	8.5	10.66	55	0.797	0.448	5.051	1.393
SiemensNovation	PD000067	58	Left	CC	9	66.08	42	0.136	0.128	8.588	0.831
SiemensNovation	PD000067	59	Right	CC	8.5	28.99	51	0.293	0.279	7.38	1.364
SiemensNovation	PD000067	59	Left	CC	8.2	28.98	48	0.283	0.264	5.918	1.386
SiemensNovation	PD000067	59	Left	MLO	17.6	23.52	52	0.748	0.461	12.645	1.626
SiemensNovation	PD000067	59	Right	MLO	13.9	20.6	54	0.675	0.42	12.987	1.63
GE	PD000067	58	Right	MLO	15	17.86	67	0.84	0.473	11.503	2.462
GE	PD000067	58	Left	MLO	14	17.72	60	0.79	0.463	7.54	2.727
GE	PD000067	58	Right	CC	8	26.43	57	0.303	0.289	9.897	2.773
GE	PD000067	58	Left	CC	8	27.13	55	0.295	0.277	9.677	2.949
SiemensNovation	PD000068	63	Right	MLO	7.6	23.94	37	0.317	0.126	16.047	0.832
SiemensNovation	PD000068	63	Right	CC	7.6	54.31	36	0.14	0.087	15.779	0.832
SiemensNovation	PD000068	63	Left	CC	7.5	33.92	44	0.221	0.167	19.835	0.959
SiemensNovation	PD000068	63	Left	MLO	6.8	12.9	41	0.527	0.252	10.476	1.183
SiemensNovation	PD000069	79	Right	MLO	14.3	14.19	37	1.008	0.374	4.612	0.834
SiemensNovation	PD000069	79	Right	MLO	14.3	14.19	37	1.008	0.374	4.612	0.834
SiemensNovation	PD000069	79	Left	CC	8.8	21.21	41	0.415	0.288	3.747	0.837
SiemensNovation	PD000069	79	Left	CC	8.8	21.21	41	0.415	0.288	3.747	0.837
SiemensNovation	PD000069	79	Right	CC	8.7	18.23	41	0.477	0.316	4.096	0.838
SiemensNovation	PD000069	79	Right	CC	8.7	18.23	41	0.477	0.316	4.096	0.838
SiemensNovation	PD000069	79	Left	MLO	11.8	11.66	42	1.012	0.455	4.327	1.255
SiemensNovation	PD000069	79	Left	MLO	11.8	11.66	42	1.012	0.455	4.327	1.255
Hologic	PD000070	40	Left	CC	12.855	21.45	26	0.599	0.202	15.127	0.836
SiemensNovation	PD000070	38	Right	MLO	5.1	9.19	48	0.555	0.319	9.132	1.028
SiemensNovation	PD000070	38	Right	CC	6.7	17.39	43	0.385	0.289	11.764	1.032
Hologic	PD000070	40	Right	CC	9.608	19.38	37	0.496	0.28	10.357	1.168
Hologic	PD000070	40	Left	MLO	14.501	15.18	35	0.955	0.238	10.47	1.181
SiemensNovation	PD000070	38	Right	MLO	12.8	14.87	36	0.861	0.27	10.282	1.183
Hologic	PD000070	40	Right	MLO	15.702	18.8	38	0.835	0.257	10.29	1.561
GE	PD000071	56	Left	CC	9	15.24	29	0.59	0.214	7.472	0.836
GE	PD000071	56	Left	MLO	10	8.92	35	1.122	0.293	7.822	1.223
GE	PD000071	54	Left	MLO	14	11.9	51	1.176	0.557	6.026	2.359
GE	PD000071	54	Left	CC	13	21.58	45	0.602	0.398	7.137	2.499
GE	PD000071	54	Right	CC	13	30.34	50	0.428	0.368	11.874	4.081
SiemensNovation	PD000072	66	Right	CC	11.2	21.33	41	0.525	0.34	3.785	0.836
SiemensNovation	PD000072	66	Left	CC	11	21.65	44	0.508	0.375	3.951	1.114
SiemensNovation	PD000072	66	Right	MLO	18.7	22.78	39	0.821	0.226	9.875	1.436
SiemensNovation	PD000072	66	Left	MLO	13.5	17.08	46	0.79	0.304	8.259	1.468
SiemensNovation	PD000073	75	Left	CC	9.8	19.27	39	0.509	0.304	3.874	0.837
SiemensNovation	PD000073	75	Right	CC	8.1	15.84	42	0.511	0.338	3.201	0.842
SiemensNovation	PD000073	75	Left	MLO	8.5	12.36	51	0.688	0.456	5.439	1.046
SiemensNovation	PD000073	75	Right	MLO	11.8	14.12	46	0.836	0.456	3.559	1.155
Hologic	PD000074	61	Right	MLO	8.58	27.45	23	0.313	0.088	27.416	0.925
SiemensNovation	PD000074	60	Right	MLO	5.6	33.89	24	0.165	0.063	13.601	1.205
SiemensNovation	PD000074	60	Left	MLO	5.1	24.29	23	0.21	0.073	10.417	1.233
GE	PD000075	61	Right	CC	9	25.29	38	0.356	0.215	17.473	0.845
GE	PD000075	61	Left	CC	9	19.57	41	0.46	0.287	13.002	0.996
GE	PD000075	61	Right	MLO	15	15.56	52	0.964	0.451	9.223	1.098
GE	PD000075	61	Left	MLO	16	14.45	55	1.107	0.611	6.361	1.244
Hologic	PD000076	67	Left	CC	6.806	6.23	43	1.092	0.645	4.769	0.849
Hologic	PD000076	67	Right	CC	10.72	10.38	41	1.033	0.578	6.044	0.99
GE	PD000076	66	Left	CC	11	9.19	49	1.196	0.779	3.779	1.396
GE	PD000076	66	Right	CC	12	10.56	46	1.137	0.685	4.257	1.564
GE	PD000076	66	Right	MLO	16	10.18	78	1.571	1.531	7.428	1.768
GE	PD000076	66	Left	MLO	17	11.78	69	1.443	1.247	3.666	1.92
Hologic	PD000076	67	Left	MLO	16.058	10.77	55	1.492	0.959	6.072	2.022
GE	PD000076	66	Right	MLO	17	11.09	71	1.533	1.216	5.198	2.028
Hologic	PD000076	67	Right	MLO	15.168	9.89	65	1.533	1.176	6.289	2.592
SiemensNovation	PD000077	47	Right	MLO	9.6	16.92	33	0.568	0.196	17.11	1.096
SiemensNovation	PD000077	47	Right	CC	9.1	35.86	40	0.254	0.17	20.028	1.385
SiemensNovation	PD000077	47	Left	MLO	7.9	14.23	43	0.555	0.264	14.515	1.505
GE	PD000078	67	Right	CC	14	28.25	56	0.496	0.49	7.399	0.854
GE	PD000078	67	Left	CC	12	23.37	56	0.513	0.511	3.44	0.884
GE	PD000078	67	Right	MLO	13	13.08	61	0.994	0.715	4.355	0.976
GE	PD000078	67	Left	MLO	3	3.33	60	0.9	0.644	3.471	1.069
GE	PD000079	50	Left	CC	13	45.67	44	0.285	0.202	8.048	0.854
GE	PD000079	50	Left	MLO	17	17.9	57	0.95	0.397	4.989	0.959
GE	PD000080	62	Right	CC	12	38	44	0.316	0.223	9.168	0.855
GE	PD000080	62	Right	MLO	13	20.91	63	0.622	0.283	9.112	1.186
GE	PD000080	62	Left	CC	16	36.25	46	0.441	0.33	13.032	1.205
GE	PD000080	62	Left	MLO	10	13.26	61	0.754	0.421	9.673	1.36
Hologic	PD000081	62	Left	MLO	13.63	19.81	27	0.688	0.139	15.182	0.856
Hologic	PD000081	62	Right	CC	6.3	17.05	27	0.37	0.142	21.106	0.941
Hologic	PD000081	62	Left	CC	6.71	20.28	26	0.331	0.124	20.172	0.974
Hologic	PD000081	62	Right	MLO	18.2	23.3	28	0.781	0.131	13.557	1.045
HologicTomo	PD000081	62	Left	MLO	13.63	20.14	27	0.677	0.14	17.137	1.165
HologicTomo	PD000081	62	Right	CC	6.3	19.16	27	0.329	0.131	18.474	1.308
HologicTomo	PD000081	62	Left	CC	6.71	23.63	26	0.284	0.112	19.009	1.345
HologicTomo	PD000081	62	Right	MLO	18.2	23.83	28	0.764	0.118	16.258	1.348
SiemensNovation	PD000082	46	Left	CC	9.3	65.2	36	0.143	0.087	12.365	0.856
SiemensNovation	PD000082	46	Right	MLO	14.5	28.97	45	0.5	0.193	9.497	1.537
SiemensNovation	PD000082	46	Left	MLO	15.8	30.97	42	0.51	0.194	7.859	1.77
Hologic	PD000083	74	Right	CC	8.452	11.8	29	0.716	0.269	15.505	0.857
Hologic	PD000083	74	Left	MLO	14.234	17.76	26	0.801	0.239	22.331	0.885
Hologic	PD000083	74	Right	MLO	9.564	9.96	28	0.961	0.216	20.083	0.901
Hologic	PD000083	74	Left	CC	3.648	5.15	29	0.708	0.266	13.416	0.916
GE	PD000084	50	Left	CC	11	29.64	38	0.371	0.22	18.756	0.858
GE	PD000084	50	Left	MLO	12	13.35	37	0.899	0.286	14.894	1.206
SiemensNovation	PD000085	57	Right	CC	9.1	76.7	31	0.119	0.062	27.833	0.858
SiemensNovation	PD000085	57	Left	MLO	9.8	21.54	39	0.455	0.188	13.577	1.164
SiemensNovation	PD000085	57	Left	CC	8.7	43.92	45	0.198	0.16	22.563	1.303
SiemensNovation	PD000085	57	Right	MLO	8.3	25.86	42	0.321	0.163	24.191	1.437
GE	PD000085	56	Left	MLO	15	23.82	52	0.63	0.268	11.278	2.741
GE	PD000085	56	Right	MLO	9	21.09	46	0.427	0.197	19.209	2.823
GE	PD000085	56	Left	CC	7	37.81	47	0.185	0.139	18.09	2.932
SiemensNovation	PD000086	63	Left	MLO	5.7	9.39	38	0.607	0.243	15.103	0.86
SiemensNovation	PD000086	63	Left	CC	5.4	8.7	37	0.621	0.332	11.526	0.889
GE	PD000086	63	Left	MLO	15	13.81	43	1.086	0.475	12.46	1.116
GE	PD000086	63	Left	MLO	15	13.81	43	1.086	0.475	12.46	1.116
GE	PD000086	63	Left	CC	10	16.49	41	0.606	0.353	14.6	1.153
GE	PD000086	63	Left	CC	10	16.49	41	0.606	0.353	14.6	1.153
GE	PD000086	63	Right	CC	12	21.73	41	0.552	0.328	9.86	1.169
GE	PD000086	63	Right	CC	12	21.73	41	0.552	0.328	9.86	1.169
GE	PD000086	63	Right	MLO	16	18.75	41	0.853	0.444	14.871	1.18
GE	PD000086	63	Right	MLO	16	18.75	41	0.853	0.444	14.871	1.18
GE	PD000087	71	Left	CC	14	16.15	29	0.867	0.299	4.468	0.866
GE	PD000087	71	Right	MLO	16	11.29	36	1.417	0.498	7.255	0.982
GE	PD000087	71	Left	MLO	15	9.94	34	1.509	0.485	7.154	1.068
GE	PD000087	71	Right	CC	15	16.26	30	0.922	0.328	4.237	1.088
GE	PD000088	66	Right	CC	14	46.71	38	0.3	0.19	17.643	0.869
GE	PD000088	66	Left	CC	11	34.32	40	0.321	0.213	18.273	0.967
GE	PD000088	66	Right	CC	7	24.71	40	0.283	0.191	18.999	0.973
GE	PD000088	66	Right	MLO	15	18.18	45	0.825	0.334	10.144	1.058
GE	PD000088	66	Left	MLO	14	18.42	43	0.76	0.326	12.648	1.078
GE	PD000089	53	Right	MLO	15	25.04	48	0.599	0.278	8.509	0.869
SiemensNovation	PD000089	52	Right	CC	8.1	43.92	40	0.184	0.128	6.589	0.92
GE	PD000089	53	Left	MLO	16	17.19	49	0.931	0.333	6.157	0.996
SiemensNovation	PD000089	52	Right	MLO	7	15.54	48	0.45	0.269	9.424	1.002
GE	PD000089	53	Left	CC	14	39.69	42	0.353	0.253	14.178	1.06
SiemensNovation	PD000089	52	Left	MLO	8	11.84	45	0.675	0.333	6.137	1.092
GE	PD000089	53	Right	CC	14	59.31	40	0.236	0.159	15.597	1.219
SiemensNovation	PD000089	52	Left	CC	6.5	17.65	51	0.368	0.336	5.169	1.396
SiemensNovation	PD000090	65	Right	MLO	7.7	13.8	38	0.558	0.154	9.719	0.871
SiemensNovation	PD000090	65	Right	CC	9	45.59	36	0.197	0.139	5.071	0.919
GE	PD000091	76	Right	CC	9	5.74	44	1.567	0.848	3.656	0.872
GE	PD000091	76	Right	MLO	16	6.92	49	2.311	1.019	4.777	0.972
GE	PD000091	76	Left	MLO	15	6.4	44	2.343	1.024	2.631	1.146
GE	PD000091	76	Left	CC	11	6.17	42	1.782	0.896	2.052	1.362
GE	PD000092	37	Left	CC	15	51.39	50	0.292	0.251	19.961	0.873
GE	PD000092	37	Left	MLO	12	16.12	56	0.744	0.414	11.074	1.18
SiemensNovation	PD000092	35	Left	CC	13.9	83.59	43	0.166	0.161	5.609	1.372
SiemensNovation	PD000092	35	Left	CC	9.1	32.18	46	0.283	0.23	6.096	1.492
SiemensNovation	PD000092	35	Left	MLO	7.2	13.22	52	0.544	0.351	8.665	1.688
GE	PD000093	74	Right	CC	15	20.27	44	0.74	0.46	9.662	0.874
GE	PD000093	74	Left	CC	17	25.64	52	0.663	0.542	8.41	1.089
GE	PD000093	74	Right	MLO	13	11.25	53	1.156	0.658	5.9	1.134
GE	PD000093	74	Left	MLO	18	14.8	55	1.216	0.662	9.364	1.255
GE	PD000093	74	Left	MLO	16	10.04	64	1.593	0.947	8.332	1.419
SiemensNovation	PD000094	70	Right	MLO	10	19.78	37	0.506	0.222	10.743	0.876
SiemensNovation	PD000094	70	Left	MLO	10.2	19.73	35	0.517	0.188	8.658	1.143
SiemensNovation	PD000094	70	Left	CC	10.9	45.89	39	0.238	0.166	5.118	1.231
SiemensNovation	PD000094	70	Right	CC	9.6	52.95	41	0.181	0.149	4.23	1.547
Hologic	PD000095	51	Left	CC	12.144	42.75	26	0.284	0.111	18.765	0.877
Hologic	PD000095	51	Right	CC	10.898	46.67	25	0.234	0.092	19.542	1.022
Hologic	PD000095	51	Right	MLO	16.814	22.93	32	0.733	0.176	14.727	1.514
Hologic	PD000095	51	Left	MLO	16.814	26.04	35	0.646	0.153	11.371	1.639
GE	PD000096	51	Right	MLO	16	17.79	36	0.9	0.181	7.999	0.878
GE	PD000096	51	Left	MLO	10	12.79	37	0.782	0.191	12.354	0.88
GE	PD000096	51	Right	MLO	7	9.18	34	0.763	0.162	12.303	1.117
GE	PD000096	51	Left	CC	8	27.98	32	0.286	0.145	19.192	1.138
GE	PD000096	51	Right	CC	5	19.6	34	0.255	0.144	20.577	1.15
Hologic	PD000097	78	Right	MLO	17.45	21.28	29	0.82	0.213	12.794	0.882
Hologic	PD000097	78	Right	CC	14.35	45.39	24	0.316	0.108	19.902	1.116
SiemensNovation	PD000098	56	Right	CC	10.3	34.51	36	0.298	0.182	12.78	0.884
SiemensNovation	PD000098	56	Left	MLO	10.7	18.61	35	0.575	0.213	13.373	1.123
SiemensNovation	PD000098	56	Right	MLO	12.1	23.86	37	0.507	0.177	11.163	1.166
SiemensNovation	PD000098	56	Left	CC	10.6	35.85	39	0.296	0.205	12.768	1.474
GE	PD000098	57	Left	MLO	14	23.77	40	0.589	0.208	12.721	1.506
GE	PD000098	57	Right	MLO	13	20.92	41	0.621	0.182	10.756	1.579
GE	PD000098	57	Right	CC	13	37.15	33	0.35	0.169	15.612	1.705
GE	PD000098	57	Left	CC	14	41.51	35	0.337	0.181	16.651	1.898
SiemensNovation	PD000099	60	Left	MLO	8.4	10.1	37	0.832	0.321	12.126	0.885
SiemensNovation	PD000099	60	Right	MLO	8.8	10.27	36	0.857	0.304	10.13	0.898
SiemensNovation	PD000099	60	Left	CC	8.7	20	32	0.435	0.202	14.468	1.113
SiemensNovation	PD000099	60	Right	CC	8.9	20.54	32	0.433	0.202	5.907	1.181
GE	PD000100	59	Left	CC	13	49.62	46	0.262	0.218	19.65	0.885
GE	PD000100	59	Right	CC	8	29.56	44	0.271	0.226	21.167	0.938
GE	PD000100	59	Left	MLO	14	18.85	49	0.743	0.294	9.713	1.014
GE	PD000100	59	Right	MLO	11	13.43	50	0.819	0.295	11.928	1.244
SiemensNovation	PD000101	44	Right	MLO	7.5	19.57	40	0.383	0.169	9.463	0.887
SiemensNovation	PD000101	44	Right	CC	7.1	33.66	47	0.211	0.202	5.223	1.125
SiemensNovation	PD000102	56	Right	CC	11.8	66.97	29	0.176	0.085	24.895	0.889
SiemensNovation	PD000102	56	Left	CC	11	71.57	32	0.154	0.079	12.029	0.955
SiemensNovation	PD000102	56	Right	MLO	16.1	43.34	29	0.371	0.112	26.312	1.324
SiemensNovation	PD000102	56	Left	MLO	13.9	35.41	30	0.393	0.102	20.327	1.334
Hologic	PD000103	49	Right	CC	4.448	29.51	38	0.151	0.097	19.39	0.89
Hologic	PD000103	49	Left	CC	4.493	25.79	40	0.174	0.114	12.949	1.019
Hologic	PD000103	49	Right	MLO	12.099	23.57	37	0.513	0.206	11.606	1.064
Hologic	PD000103	49	Left	MLO	6.939	12.61	44	0.55	0.238	18.918	1.079
GE	PD000104	75	Left	MLO	15	24.22	28	0.619	0.181	14.486	0.891
GE	PD000104	75	Left	CC	9	25.64	25	0.351	0.114	12.798	1.417
GE	PD000105	66	Left	MLO	11	12.7	56	0.866	0.64	6.409	0.891
GE	PD000105	66	Left	CC	14	34.51	55	0.406	0.394	4.183	1.023
GE	PD000105	65	Left	CC	9	24.27	56	0.371	0.364	3.948	2.211
GE	PD000105	65	Left	MLO	6	7.5	60	0.801	0.55	4.296	2.381
Hologic	PD000106	71	Left	MLO	14.63	16.21	27	0.902	0.177	21.147	0.894
Hologic	PD000106	71	Left	CC	12.52	31.96	26	0.392	0.142	20.323	0.895
Hologic	PD000106	71	Right	CC	3.29	15.43	39	0.213	0.16	16.614	1.554
Hologic	PD000106	71	Right	MLO	10.81	15.53	34	0.696	0.215	30.275	1.564
GE	PD000107	62	Right	CC	7	8.56	44	0.818	0.495	8.695	0.895
GE	PD000107	62	Right	MLO	15	9.98	58	1.503	0.902	8.174	1.04
GE	PD000107	62	Right	MLO	15	13.24	55	1.133	0.837	10.868	1.066
GE	PD000107	62	Left	CC	15	16.09	50	0.932	0.662	8.065	1.191
GE	PD000107	62	Left	MLO	18	12.48	53	1.443	0.752	9.176	1.283
SiemensNovation	PD000108	62	Right	MLO	8.4	13.94	39	0.602	0.269	11.535	0.896
SiemensNovation	PD000108	62	Left	MLO	8.7	14.22	37	0.612	0.253	9.256	0.908
SiemensNovation	PD000108	62	Right	CC	7.6	27.49	44	0.276	0.227	7.019	1.099
SiemensNovation	PD000108	62	Left	CC	8.2	30.24	42	0.271	0.218	6.552	1.232
SiemensNovation	PD000109	42	Left	MLO	6.6	20.06	29	0.329	0.104	23.143	0.896
SiemensNovation	PD000109	42	Left	CC	6.8	47.05	28	0.145	0.07	15.961	0.937
SiemensNovation	PD000109	42	Right	MLO	9.2	17.94	32	0.513	0.191	25.451	1.362
SiemensNovation	PD000109	42	Right	CC	8.4	35.47	38	0.237	0.163	26.764	1.442
GE	PD000110	74	Left	MLO	15	22.48	48	0.667	0.26	7.659	0.896
GE	PD000110	74	Left	CC	9	32.41	43	0.278	0.196	13.762	0.924
GE	PD000110	74	Right	CC	12	45.89	40	0.261	0.168	13.864	1.215
GE	PD000110	74	Right	MLO	11	17.72	41	0.621	0.22	7.694	1.345
GE	PD000111	66	Right	CC	11	17.78	39	0.619	0.335	12.229	0.897
GE	PD000111	66	Right	MLO	15	11.96	48	1.255	0.574	10.329	1.111
GE	PD000111	66	Right	MLO	15	13.55	56	1.107	0.682	13.654	1.876
GE	PD000111	66	Right	MLO	15	13.55	56	1.107	0.682	13.654	1.876
GE	PD000111	66	Right	CC	16	32.61	54	0.491	0.453	13.933	1.936
GE	PD000111	66	Right	CC	16	32.61	54	0.491	0.453	13.933	1.936
SiemensNovation	PD000112	60	Left	CC	6.8	27.62	36	0.246	0.152	8.073	0.897
SiemensNovation	PD000112	60	Right	MLO	10.1	31.43	33	0.321	0.144	16.659	1.12
SiemensNovation	PD000112	60	Right	MLO	14	20.51	31	0.682	0.196	17.169	1.439
SiemensNovation	PD000112	60	Right	CC	9.8	33.25	30	0.295	0.141	21.854	1.63
SiemensNovation	PD000112	60	Left	MLO	16.2	22.23	25	0.729	0.156	12.164	2.035
SiemensNovation	PD000113	60	Right	CC	9.2	58.02	36	0.159	0.097	7.485	0.898
SiemensNovation	PD000113	60	Left	CC	7.8	43.31	46	0.18	0.156	5.952	1.116
SiemensNovation	PD000113	60	Right	MLO	9.2	18.19	41	0.506	0.293	10.525	1.186
SiemensNovation	PD000113	60	Left	MLO	7.4	14.05	44	0.527	0.296	9.144	1.336
GE	PD000114	64	Right	CC	13	47.12	40	0.276	0.182	17.203	0.899
GE	PD000114	64	Right	MLO	12	17.62	48	0.681	0.271	13.422	1.1
GE	PD000114	64	Left	CC	12	43.12	45	0.278	0.203	18.038	1.184
GE	PD000114	64	Left	MLO	13	19.46	47	0.668	0.356	15.093	1.222
GE	PD000115	61	Right	CC	13	53.47	40	0.243	0.159	20.114	0.9
GE	PD000115	61	Left	CC	12	46.76	44	0.257	0.187	22.602	1.083
GE	PD000115	61	Right	MLO	13	19.91	49	0.653	0.342	11.707	1.129
GE	PD000115	61	Left	MLO	16	22.34	56	0.716	0.397	11.414	1.138
GE	PD000115	60	Right	CC	9	33.53	36	0.268	0.158	16.941	1.923
GE	PD000115	60	Right	MLO	11	16.86	39	0.653	0.23	15.341	2.16
GE	PD000115	60	Left	MLO	11	17.17	41	0.641	0.247	14.962	2.481
GE	PD000115	60	Right	CC	10	40.04	34	0.25	0.14	18.117	2.624
GE	PD000115	60	Left	CC	9	28.87	34	0.312	0.163	16.968	3.342
GE	PD000116	62	Right	CC	15	38.08	56	0.394	0.376	6.915	0.9
GE	PD000116	62	Left	MLO	15	14.84	70	1.011	0.795	7.348	1.191
GE	PD000116	62	Left	CC	17	35.81	61	0.475	0.52	7.643	1.198
GE	PD000116	62	Right	MLO	13	11.69	71	1.112	0.704	6.26	1.22
SiemensNovation	PD000117	72	Right	CC	7	25.44	36	0.275	0.171	8.012	0.9
SiemensNovation	PD000117	72	Left	CC	7.5	29.53	37	0.254	0.168	10.495	1.171
SiemensNovation	PD000117	72	Right	MLO	8.8	13.69	51	0.643	0.347	11.282	1.306
SiemensNovation	PD000117	72	Left	MLO	8.5	13.95	49	0.609	0.295	10.87	1.307
SiemensNovation	PD000118	63	Right	MLO	9.4	18.83	39	0.499	0.239	8.516	0.901
SiemensNovation	PD000118	63	Right	CC	9.6	37.78	38	0.254	0.17	6.218	1.219
SiemensNovation	PD000118	63	Left	CC	9.8	35.87	36	0.273	0.173	4.521	1.24
GE	PD000118	62	Left	CC	15	51.65	42	0.29	0.214	5.905	1.375
SiemensNovation	PD000118	63	Left	MLO	11.3	19.13	42	0.591	0.214	8.089	1.488
GE	PD000118	62	Left	MLO	16	21.67	49	0.738	0.245	6.513	1.607
GE	PD000118	62	Right	CC	17	62.65	41	0.271	0.187	7.188	1.887
GE	PD000118	62	Right	MLO	16	22.72	54	0.704	0.309	12.382	2.05
GE	PD000119	69	Left	MLO	9	9.75	37	0.923	0.257	20.526	0.902
GE	PD000119	69	Left	CC	14	32.13	36	0.436	0.227	16.616	0.921
GE	PD000119	69	Right	CC	10	29.64	37	0.337	0.198	22.183	0.967
GE	PD000119	69	Right	MLO	15	16.36	36	0.917	0.239	18.589	1.015
SiemensNovation	PD000120	57	Left	MLO	11.9	15.93	43	0.747	0.34	7.638	1.339
SiemensNovation	PD000120	57	Left	CC	8.8	31.73	41	0.277	0.208	9.417	1.466
Hologic	PD000121	48	Left	MLO	5.783	14.85	31	0.389	0.133	23.317	0.903
Hologic	PD000121	48	Right	CC	3.87	32	31	0.121	0.061	14.677	0.93
Hologic	PD000121	48	Right	MLO	10.231	25.97	32	0.394	0.077	15.523	1.029
Hologic	PD000121	48	Left	CC	6.227	40.16	32	0.155	0.082	21.832	1.115
GE	PD000122	66	Left	MLO	15	18.39	48	0.816	0.247	10.614	0.904
GE	PD000122	66	Left	CC	12	43.36	41	0.277	0.184	14.625	0.95
GE	PD000123	50	Right	CC	9	30.88	40	0.291	0.196	18.734	0.904
GE	PD000123	50	Left	CC	10	25.48	46	0.393	0.305	16.534	1.097
GE	PD000123	50	Left	MLO	15	15.46	56	0.97	0.491	12.984	1.18
GE	PD000123	50	Right	MLO	15	17.59	57	0.853	0.439	10.864	1.196
GE	PD000123	50	Right	MLO	14	17.02	55	0.822	0.441	11.174	1.359
SiemensNovation	PD000124	74	Left	CC	10.3	19.88	26	0.518	0.177	11.122	0.905
SiemensNovation	PD000124	74	Right	CC	11.2	21.77	28	0.514	0.194	10.652	1.522
SiemensNovation	PD000124	74	Right	MLO	10.6	13.48	29	0.786	0.219	9.704	1.534
SiemensNovation	PD000124	74	Left	MLO	11.6	14.89	25	0.779	0.188	11.843	1.647
Hologic	PD000125	68	Right	CC	5.77	6.22	32	0.928	0.382	12.292	0.906
Hologic	PD000125	68	Right	MLO	15.56	10.35	36	1.503	0.517	7.228	0.909
Hologic	PD000125	68	Left	CC	8.22	7.44	36	1.105	0.519	11.051	0.913
Hologic	PD000125	68	Left	MLO	11.13	7.58	40	1.468	0.611	5.825	0.988
HologicTomo	PD000125	68	Right	CC	5.77	6.26	32	0.921	0.381	12.094	1.219
HologicTomo	PD000125	68	Left	CC	8.22	7.42	36	1.107	0.521	10.156	1.244
HologicTomo	PD000125	68	Right	MLO	15.56	10.3	36	1.51	0.464	6.584	1.27
HologicTomo	PD000125	68	Left	MLO	11.13	7.55	40	1.474	0.612	7.414	1.552
GE	PD000126	47	Left	MLO	12	15.91	36	0.754	0.233	14.151	0.907
GE	PD000126	47	Left	CC	10	41.76	37	0.239	0.154	20.028	1.069
GE	PD000127	65	Right	CC	11	39.94	43	0.275	0.207	18.87	0.908
GE	PD000127	65	Left	MLO	10	12.65	49	0.79	0.363	12.536	1.048
GE	PD000127	65	Right	MLO	11	14.43	45	0.762	0.304	14.702	1.056
GE	PD000127	65	Left	CC	12	39.27	42	0.306	0.205	16.927	1.095
GE	PD000128	51	Left	CC	14	54.01	37	0.259	0.152	15.642	0.909
GE	PD000128	51	Left	MLO	17	24.46	49	0.695	0.22	14.897	0.996
GE	PD000128	51	Right	CC	8	37.12	41	0.216	0.143	20.182	1.04
GE	PD000128	51	Right	MLO	17	25.74	50	0.66	0.279	8.13	1.105
GE	PD000128	50	Right	CC	6	32.91	38	0.182	0.116	20.657	1.982
GE	PD000128	50	Right	MLO	6	14.69	38	0.409	0.175	15.003	2.1
GE	PD000128	50	Left	CC	5	25.57	39	0.196	0.127	11.543	2.261
GE	PD000128	50	Left	MLO	8	15.34	43	0.522	0.164	13.747	2.385
SiemensNovation	PD000129	64	Left	CC	12.6	32.77	31	0.384	0.179	21.91	0.909
GE	PD000129	65	Right	CC	11	29.17	45	0.377	0.287	11.128	1.303
SiemensNovation	PD000129	64	Right	CC	11.7	32.47	35	0.36	0.202	9.367	1.473
GE	PD000129	65	Left	MLO	17	16.49	58	1.031	0.557	7.03	1.611
GE	PD000129	65	Right	MLO	17	23.55	57	0.722	0.374	6.521	1.675
GE	PD000129	65	Left	CC	16	38.96	48	0.411	0.34	10.154	1.738
SiemensNovation	PD000129	64	Left	MLO	19.7	16.66	35	1.182	0.298	8.147	1.983
SiemensNovation	PD000129	64	Right	MLO	13.9	16.28	47	0.854	0.394	10.896	2.142
GE	PD000130	62	Right	CC	11	38.52	45	0.286	0.217	17.284	0.91
GE	PD000130	62	Right	MLO	15	20.74	48	0.723	0.366	8.771	0.949
GE	PD000130	62	Left	CC	12	41.49	48	0.289	0.239	14.409	0.959
GE	PD000130	62	Left	CC	10	33.33	48	0.3	0.246	12.318	0.997
GE	PD000130	62	Left	MLO	13	17.21	47	0.755	0.353	7.603	1.053
GE	PD000131	59	Left	CC	12	40.33	46	0.298	0.249	3.877	0.911
GE	PD000131	59	Right	MLO	8	12.75	49	0.627	0.296	12.273	0.984
GE	PD000131	59	Left	MLO	13	16.01	53	0.812	0.306	7.167	1.112
GE	PD000131	59	Right	CC	5	24.47	35	0.204	0.117	14.481	1.324
GE	PD000131	58	Left	MLO	9	10.22	58	0.88	0.349	5.638	1.566
GE	PD000131	58	Left	CC	12	41.37	42	0.29	0.215	5.078	1.87
GE	PD000132	71	Left	CC	17	57.39	36	0.296	0.162	12.081	0.911
GE	PD000132	71	Right	MLO	17	31.84	45	0.534	0.266	7.097	0.921
GE	PD000132	71	Left	MLO	18	30.51	48	0.59	0.241	4.882	0.951
GE	PD000132	71	Right	CC	17	61.08	37	0.278	0.155	13.235	0.991
Hologic	PD000133	70	Left	CC	10.06	39.43	28	0.255	0.114	13.289	0.911
Hologic	PD000133	70	Left	MLO	11.51	16.08	35	0.716	0.229	15.463	1.233
GE	PD000134	64	Right	CC	15	23.82	56	0.63	0.581	5.745	0.911
GE	PD000134	64	Right	MLO	16	13.69	66	1.169	0.839	4.218	1.008
GE	PD000134	64	Left	CC	14	23.55	52	0.595	0.499	5.949	1.017
GE	PD000134	64	Right	MLO	16	14.32	70	1.117	0.912	4.299	1.219
GE	PD000134	64	Left	MLO	15	12.68	70	1.183	0.933	5.489	1.262
SiemensNovation	PD000135	48	Left	CC	8.7	21.22	30	0.41	0.178	25.09	0.913
SiemensNovation	PD000135	48	Right	MLO	12.9	14.41	26	0.895	0.19	18.641	0.933
SiemensNovation	PD000135	48	Right	CC	10.5	19.56	29	0.537	0.212	15.779	0.955
SiemensNovation	PD000135	48	Left	MLO	13.9	18.73	30	0.742	0.128	20.425	1.355
SiemensNovation	PD000136	70	Left	CC	7.4	22.01	37	0.336	0.21	7.492	0.914
SiemensNovation	PD000136	70	Left	MLO	7.5	12.65	48	0.593	0.402	6.455	1.041
GE	PD000137	66	Right	MLO	15	18.16	46	0.826	0.427	6.831	0.915
GE	PD000137	66	Left	MLO	17	15.99	47	1.063	0.35	6.167	1.094
GE	PD000137	66	Right	CC	9	20.16	34	0.447	0.218	10.795	1.113
GE	PD000137	66	Left	CC	13	23.61	42	0.551	0.347	8.256	1.354
SiemensNovation	PD000138	56	Right	CC	8.4	43.6	49	0.193	0.164	19.611	0.915
SiemensNovation	PD000138	56	Right	MLO	9.1	22.37	53	0.407	0.159	11.84	0.946
SiemensNovation	PD000138	56	Left	CC	10.8	40.76	54	0.265	0.271	25.146	1.469
SiemensNovation	PD000138	56	Left	MLO	8.8	14.94	60	0.589	0.239	11.8	1.558
GE	PD000139	64	Right	CC	11	24.52	45	0.449	0.325	6.19	0.915
GE	PD000139	64	Right	MLO	17	16.97	44	1.002	0.417	7.237	0.916
SiemensNovation	PD000139	63	Right	CC	12.8	23.86	38	0.536	0.31	5.347	1.241
SiemensNovation	PD000139	63	Right	MLO	15.2	15.1	31	1.007	0.295	9.233	1.539
GE	PD000140	60	Right	CC	15	18.5	44	0.811	0.491	9.402	0.917
GE	PD000140	60	Right	MLO	12	10.55	51	1.137	0.574	7.778	1.079
GE	PD000140	60	Left	MLO	13	10.45	49	1.245	0.564	12.968	1.154
GE	PD000140	60	Left	CC	11	12.85	42	0.856	0.479	12.088	1.194
GE	PD000140	59	Left	CC	14	13.43	44	1.042	0.605	12.444	1.55
GE	PD000140	59	Right	MLO	17	13.85	47	1.228	0.628	8.449	1.587
GE	PD000140	59	Right	CC	16	16.49	42	0.97	0.534	9.651	1.611
GE	PD000140	59	Left	MLO	18	13.4	48	1.344	0.639	12.115	1.698
GE	PD000141	75	Right	CC	13	51.23	37	0.254	0.15	12.549	0.917
GE	PD000141	75	Right	MLO	14	19.88	50	0.704	0.249	9.683	0.988
SiemensNovation	PD000141	73	Right	CC	14.1	63.12	30	0.223	0.114	7.949	1.911
SiemensNovation	PD000141	73	Right	MLO	14.7	25.15	38	0.585	0.201	9.526	2.041
Hologic	PD000142	52	Left	CC	5.293	5.98	23	0.885	0.241	19.319	0.917
Hologic	PD000142	52	Left	MLO	5.738	5.41	28	1.06	0.312	17.133	0.951
Hologic	PD000142	52	Right	MLO	14.323	9.98	27	1.436	0.356	14.577	0.955
Hologic	PD000142	52	Right	CC	7.251	7.85	25	0.924	0.278	20.258	0.957
SiemensNovation	PD000143	77	Right	CC	8.1	33.4	27	0.243	0.105	7.345	0.918
SiemensNovation	PD000143	77	Right	MLO	8.4	14.48	31	0.58	0.155	10.797	1.124
SiemensNovation	PD000143	77	Left	MLO	7.8	11.94	32	0.653	0.268	7.813	1.167
SiemensNovation	PD000143	77	Left	CC	8.2	20.19	29	0.406	0.17	14.09	1.461
GE	PD000144	61	Left	CC	15	37.5	48	0.4	0.332	7.221	0.919
GE	PD000144	61	Right	MLO	16	16.62	52	0.963	0.459	7.6	1.043
GE	PD000144	61	Left	MLO	17	18.8	59	0.904	0.536	5.864	1.046
GE	PD000144	61	Right	CC	14	34.27	49	0.409	0.349	7.652	1.061
GE	PD000145	70	Left	MLO	17	26.45	29	0.643	0.182	12.172	0.919
GE	PD000145	70	Left	CC	4	13.55	27	0.295	0.11	19.773	1.064
GE	PD000146	71	Left	MLO	14	15.17	49	0.923	0.45	4.383	0.92
SiemensNovation	PD000146	70	Left	CC	6.9	16.73	48	0.413	0.366	4.04	1.059
SiemensNovation	PD000146	70	Left	MLO	10	12.74	47	0.785	0.4	4.267	1.145
GE	PD000146	71	Left	CC	16	33.39	44	0.479	0.333	10.374	1.208
SiemensNovation	PD000147	57	Left	CC	9.5	44.86	39	0.212	0.148	5.287	0.921
SiemensNovation	PD000147	57	Right	MLO	10.3	19.49	37	0.528	0.188	8.668	1.18
SiemensNovation	PD000147	57	Right	CC	10.2	44.76	39	0.228	0.153	7.165	1.209
SiemensNovation	PD000147	57	Left	MLO	10.3	18.61	37	0.553	0.184	5.646	1.221
GE	PD000148	69	Left	MLO	15	10.47	56	1.433	0.797	10.095	0.921
GE	PD000148	69	Left	CC	13	11.92	48	1.091	0.706	7.027	0.963
GE	PD000148	69	Right	MLO	16	12.29	54	1.302	0.642	9.055	1.186
GE	PD000148	69	Right	CC	14	16.79	51	0.834	0.62	7.519	1.27
SiemensNovation	PD000149	51	Right	CC	9.2	30.32	37	0.303	0.188	5.131	0.922
SiemensNovation	PD000149	52	Right	CC	7.7	26.62	37	0.289	0.183	4.811	0.923
SiemensNovation	PD000149	52	Right	MLO	7.3	16.44	47	0.444	0.31	4.588	1.138
SiemensNovation	PD000149	52	Left	CC	10	19.69	45	0.508	0.379	8.215	1.346
SiemensNovation	PD000149	51	Left	CC	12.1	23.64	45	0.512	0.381	7.416	1.625
SiemensNovation	PD000149	51	Right	MLO	15.6	31.47	42	0.496	0.298	8.581	1.782
SiemensNovation	PD000149	52	Left	MLO	10.9	11.82	55	0.922	0.577	6.879	2.081
SiemensNovation	PD000149	51	Left	MLO	15.6	16.85	60	0.926	0.602	7.108	2.284
Hologic	PD000150	65	Right	CC	11.52	37.72	37	0.305	0.203	6.706	0.922
Hologic	PD000150	65	Left	CC	7.55	25.43	41	0.297	0.206	7.516	0.96
Hologic	PD000150	65	Right	MLO	17.28	19.12	42	0.904	0.233	6.126	1.246
Hologic	PD000150	65	Left	MLO	12.08	12.89	46	0.937	0.38	7.232	1.316
HologicTomo	PD000150	65	Right	CC	11.52	38.82	37	0.297	0.2	6.044	1.33
HologicTomo	PD000150	65	Left	CC	7.55	25.55	41	0.296	0.204	7.106	1.61
HologicTomo	PD000150	65	Right	MLO	17.28	19.16	42	0.902	0.252	6.417	1.646
HologicTomo	PD000150	65	Left	MLO	12.08	13.01	46	0.928	0.343	5.78	1.733
SiemensNovation	PD000151	55	Right	CC	5.1	9.51	42	0.536	0.351	7.397	0.924
SiemensNovation	PD000151	55	Left	CC	9.8	8.14	48	1.204	0.818	3.125	1.074
SiemensNovation	PD000151	55	Right	MLO	8.9	11.03	46	0.807	0.384	4.566	1.145
GE	PD000151	54	Right	MLO	11	13.69	52	0.804	0.47	5.075	1.366
GE	PD000151	54	Left	CC	12	9.58	53	1.253	0.906	3.234	1.554
GE	PD000151	54	Left	MLO	13	9.25	63	1.405	0.943	2.337	1.644
SiemensNovation	PD000151	55	Left	MLO	9.5	6.23	52	1.524	0.897	3.176	1.787
GE	PD000151	54	Right	CC	10	16.02	46	0.624	0.425	3.532	1.913
GE	PD000152	67	Left	CC	11	31.57	40	0.348	0.226	17.857	0.925
GE	PD000152	67	Left	MLO	14	15.76	47	0.888	0.327	8.59	1.227
GE	PD000153	53	Left	CC	7	13.43	26	0.521	0.167	12.114	0.925
GE	PD000153	53	Left	MLO	18	22.09	41	0.815	0.228	13.925	1.079
GE	PD000153	53	Right	MLO	15	17.4	39	0.862	0.226	18.302	1.113
GE	PD000153	53	Right	CC	11	22.72	30	0.484	0.19	19.102	1.185
SiemensNovation	PD000154	64	Right	CC	11.3	44.31	37	0.255	0.166	5.235	0.925
SiemensNovation	PD000154	64	Right	MLO	14.9	27.25	38	0.547	0.217	11.852	1.155
GE	PD000154	65	Right	CC	9	39.21	45	0.23	0.181	7.224	1.311
GE	PD000154	65	Right	MLO	12	20.33	52	0.59	0.22	10.244	1.492
Hologic	PD000155	41	Right	CC	5.24	12.43	21	0.422	0.113	11.189	0.925
Hologic	PD000155	41	Right	MLO	6.03	7.65	24	0.789	0.147	22.574	1.163
HologicTomo	PD000155	41	Right	CC	5.24	15.05	21	0.348	0.098	12.768	1.265
HologicTomo	PD000155	41	Right	MLO	6.03	7.67	24	0.786	0.144	25.173	1.553
GE	PD000156	62	Right	CC	6	10.35	37	0.58	0.295	12.479	0.926
GE	PD000156	62	Right	MLO	12	9.71	43	1.236	0.408	7.141	1.133
SiemensNovation	PD000156	61	Right	CC	7.2	14.16	46	0.508	0.389	5.562	1.134
GE	PD000156	62	Left	MLO	13	10.36	45	1.254	0.484	12.114	1.148
GE	PD000156	62	Left	CC	6	10.03	38	0.598	0.314	12.555	1.15
SiemensNovation	PD000156	61	Left	MLO	8.8	8.07	46	1.09	0.511	8.895	1.483
SiemensNovation	PD000156	61	Left	CC	6.5	11.81	47	0.55	0.429	8.041	1.485
SiemensNovation	PD000156	61	Right	MLO	14.4	13.05	41	1.103	0.435	7.213	1.526
SiemensNovation	PD000157	72	Right	CC	8.4	31.62	41	0.266	0.187	6.165	0.927
SiemensNovation	PD000157	72	Left	CC	7	25.95	41	0.27	0.197	4.523	0.941
SiemensNovation	PD000157	72	Left	MLO	6.8	14.03	44	0.485	0.295	4.779	1.119
SiemensNovation	PD000157	72	Right	MLO	15.3	24.41	33	0.627	0.221	8.466	1.156
SiemensNovation	PD000158	63	Left	CC	9.3	17.7	28	0.526	0.198	8.399	0.927
SiemensNovation	PD000158	63	Right	CC	10.2	22.41	29	0.455	0.185	7.038	0.938
SiemensNovation	PD000158	63	Left	MLO	13.6	17.19	27	0.791	0.199	9.378	1.226
SiemensNovation	PD000158	63	Right	MLO	16.9	23.32	25	0.725	0.146	8.449	1.67
SiemensNovation	PD000159	59	Right	CC	7.3	32.41	37	0.225	0.14	7.03	0.927
SiemensNovation	PD000159	59	Right	MLO	10.3	18.57	38	0.555	0.158	7.291	1.204
SiemensNovation	PD000160	61	Right	CC	9.4	25.28	38	0.372	0.234	5.282	0.927
SiemensNovation	PD000160	61	Left	CC	9.1	26.72	44	0.341	0.268	6.351	1.354
SiemensNovation	PD000160	61	Right	MLO	15.7	30.4	47	0.516	0.32	16.067	1.373
SiemensNovation	PD000160	61	Left	MLO	14.5	32.94	49	0.44	0.298	13.311	1.629
GE	PD000160	60	Right	CC	4	12.09	49	0.331	0.28	6.439	2.788
GE	PD000160	60	Right	MLO	11	15.3	57	0.719	0.395	4.619	3.003
GE	PD000160	60	Left	CC	4	12.24	53	0.327	0.289	8.361	3.141
GE	PD000160	60	Left	MLO	8	12.65	75	0.632	0.536	9.957	3.172
GE	PD000161	69	Left	CC	8	25.12	44	0.318	0.241	7.428	0.928
GE	PD000161	69	Right	CC	9	28.17	42	0.319	0.228	15.927	0.963
GE	PD000161	69	Left	MLO	14	13.21	51	1.06	0.518	6.034	1.089
GE	PD000161	69	Right	MLO	16	15.75	54	1.016	0.513	6.882	1.217
GE	PD000162	73	Right	MLO	11	8.06	57	1.365	0.777	2.529	0.928
GE	PD000162	73	Right	CC	12	12.26	45	0.979	0.592	4.516	0.943
GE	PD000162	73	Left	CC	14	11.02	38	1.271	0.591	1.866	1.251
GE	PD000162	73	Left	MLO	14	8.67	49	1.615	0.86	3.165	1.326
SiemensNovation	PD000163	56	Right	MLO	7.3	15.43	35	0.473	0.241	22.733	0.928
SiemensNovation	PD000163	56	Left	MLO	10.4	16.47	30	0.632	0.216	20.594	0.933
SiemensNovation	PD000163	56	Right	CC	9.3	27.62	29	0.337	0.147	8.54	0.999
SiemensNovation	PD000163	56	Left	CC	10.9	28.67	31	0.38	0.177	6.906	1.007
SiemensNovation	PD000163	56	Right	MLO	9.3	29.1	30	0.32	0.08	17.588	1.454
GE	PD000164	50	Right	MLO	6	8.38	31	0.716	0.225	11.3	0.929
GE	PD000164	50	Right	CC	7	38.05	24	0.184	0.068	13.929	1.007
GE	PD000164	50	Left	MLO	10	13.23	30	0.756	0.183	10.935	1.082
GE	PD000164	50	Left	CC	6	23.98	23	0.25	0.08	15.251	1.101
GE	PD000165	68	Left	CC	7	18.31	56	0.382	0.372	5.121	0.929
GE	PD000165	68	Right	CC	10	26.72	55	0.374	0.352	5.861	1.124
GE	PD000165	68	Left	MLO	11	12.46	73	0.883	0.762	9.855	1.342
GE	PD000165	68	Right	MLO	15	14.67	78	1.023	0.762	7.163	1.355
GE	PD000166	73	Right	CC	8	16.39	36	0.488	0.248	12.021	0.929
GE	PD000166	73	Right	MLO	9	9.9	40	0.909	0.374	8.925	0.96
GE	PD000166	73	Right	MLO	3	3.92	47	0.766	0.331	9.865	1.164
GE	PD000166	73	Right	MLO	11	12.63	37	0.871	0.387	10.997	1.244
SiemensNovation	PD000167	66	Right	CC	8.4	15.25	37	0.551	0.304	5.383	0.93
SiemensNovation	PD000167	66	Left	MLO	10.6	10.26	34	1.033	0.296	8.148	1.165
SiemensNovation	PD000167	66	Right	MLO	9.7	9.61	39	1.01	0.321	7.67	1.214
SiemensNovation	PD000167	66	Left	CC	9.2	15.41	35	0.597	0.298	6.161	1.573
SiemensNovation	PD000168	59	Right	CC	11.5	46.91	38	0.245	0.18	7.442	0.931
SiemensNovation	PD000168	59	Right	CC	7.7	8.29	46	0.928	0.62	5.232	1.147
SiemensNovation	PD000168	59	Left	CC	10.2	10.44	45	0.977	0.627	5.124	1.389
SiemensNovation	PD000168	59	Right	MLO	17.4	11.03	39	1.577	0.707	5.176	1.563
SiemensNovation	PD000168	59	Left	MLO	16.5	9.58	43	1.722	0.76	4.561	1.676
GE	PD000169	69	Left	CC	15	16.74	44	0.896	0.535	6.682	0.931
GE	PD000169	69	Left	MLO	14	12.1	68	1.157	0.956	4.584	1.304
SiemensNovation	PD000169	68	Left	CC	10.9	11.73	39	0.929	0.495	5.385	1.659
SiemensNovation	PD000169	68	Left	MLO	12.9	9.71	64	1.329	1.092	7.921	3.141
SiemensNovation	PD000170	66	Left	CC	9.7	16.96	30	0.572	0.235	7.506	0.931
SiemensNovation	PD000170	66	Left	MLO	11.5	13.16	33	0.874	0.2	10.643	1.124
SiemensNovation	PD000170	66	Right	CC	9.2	18.22	30	0.505	0.211	9.503	1.229
SiemensNovation	PD000170	66	Right	MLO	14.6	15.82	27	0.923	0.162	12.567	1.468
SiemensNovation	PD000171	74	Left	MLO	10.7	10.58	37	1.011	0.423	6.099	0.931
SiemensNovation	PD000171	74	Left	CC	6.9	10.51	36	0.657	0.334	4.802	0.939
GE	PD000171	75	Left	MLO	14	13.21	48	1.06	0.529	4.574	0.99
GE	PD000171	75	Left	CC	11	15.09	36	0.729	0.339	6.857	1.147
SiemensNovation	PD000172	47	Right	CC	7.5	33.13	37	0.226	0.136	4.092	0.932
SiemensNovation	PD000172	47	Right	MLO	7.2	18.97	44	0.38	0.184	5.651	1.095
SiemensNovation	PD000172	47	Left	CC	12	29.82	56	0.402	0.412	2.801	1.493
SiemensNovation	PD000172	47	Left	MLO	14	18.57	58	0.754	0.536	4.081	1.77
GE	PD000172	46	Right	CC	5	19.12	46	0.261	0.205	9.003	2.395
GE	PD000172	46	Left	CC	13	30.71	69	0.423	0.492	3.736	2.606
GE	PD000172	46	Right	MLO	12	20.22	52	0.593	0.323	8.372	2.643
GE	PD000172	46	Left	MLO	14	15.94	72	0.878	0.762	3.559	3.02
SiemensNovation	PD000173	42	Right	CC	5.5	29.05	38	0.189	0.133	4.281	0.932
SiemensNovation	PD000173	42	Right	MLO	14.8	22.75	32	0.65	0.151	8.464	1.515
SiemensNovation	PD000174	64	Left	CC	8.3	16.41	38	0.506	0.295	5.18	0.933
SiemensNovation	PD000174	64	Right	CC	11.5	23.11	38	0.498	0.289	5.474	1.241
SiemensNovation	PD000174	64	Right	MLO	10.3	12.93	53	0.797	0.424	12.444	1.307
SiemensNovation	PD000174	64	Left	MLO	10.5	13.51	47	0.777	0.371	5.728	1.507
GE	PD000175	57	Right	CC	13	55.85	32	0.233	0.119	16.279	0.933
GE	PD000175	57	Right	MLO	8	11.98	39	0.668	0.229	15.025	1.002
GE	PD000175	57	Left	CC	4	17.99	35	0.222	0.116	17.598	1.194
GE	PD000175	57	Left	MLO	5	12.93	45	0.387	0.26	23.982	1.277
GE	PD000175	57	Left	MLO	5	11.56	46	0.432	0.122	8.096	1.562
GE	PD000176	70	Left	CC	18	28.17	58	0.639	0.623	6.003	0.934
GE	PD000176	70	Left	MLO	16	13.79	58	1.161	0.663	6.263	0.951
GE	PD000176	69	Left	CC	13	22.23	56	0.585	0.55	2.949	2.192
GE	PD000176	69	Left	MLO	16	11.26	57	1.421	0.619	5.925	2.29
SiemensNovation	PD000177	66	Right	CC	7.1	25.73	37	0.276	0.178	4.427	0.934
SiemensNovation	PD000177	65	Left	MLO	5.5	31.95	31	0.172	0.078	14.787	0.939
SiemensNovation	PD000177	65	Left	CC	6.4	36.79	34	0.174	0.096	9.144	0.983
SiemensNovation	PD000177	66	Right	MLO	8.5	14.16	39	0.6	0.285	14.371	1.154
SiemensNovation	PD000177	66	Left	MLO	7.1	36.48	35	0.195	0.12	7.744	1.156
SiemensNovation	PD000177	66	Left	CC	7.2	33.19	35	0.217	0.124	6.679	1.17
SiemensNovation	PD000177	65	Right	CC	8.1	35.05	36	0.231	0.145	4.407	1.244
SiemensNovation	PD000177	65	Right	MLO	10.9	20.62	31	0.529	0.124	14.092	1.407
GE	PD000178	60	Left	CC	9	18.93	56	0.475	0.458	5.895	0.934
GE	PD000178	60	Right	CC	10	21.17	59	0.472	0.467	3.924	1.058
GE	PD000178	60	Left	MLO	12	11.46	66	1.047	0.721	5.547	1.141
GE	PD000178	60	Left	MLO	11	10.99	66	1.001	0.663	6.789	1.172
GE	PD000178	60	Right	MLO	12	12.17	61	0.986	0.572	4.712	1.228
Hologic	PD000179	57	Right	CC	7.829	29.09	36	0.269	0.173	23.211	0.935
Hologic	PD000179	57	Right	MLO	12.722	13.5	37	0.943	0.274	18.175	1.069
Hologic	PD000179	57	Left	CC	5.694	21.57	39	0.264	0.189	22.342	1.088
Hologic	PD000179	57	Left	MLO	12.188	14.35	38	0.849	0.278	13.4	1.219
Hologic	PD000180	76	Left	CC	13.26	52.01	31	0.255	0.132	10.561	0.935
Hologic	PD000180	76	Left	MLO	16.03	20.65	39	0.776	0.204	6.954	1.098
SiemensNovation	PD000181	52	Left	MLO	9.9	10.86	36	0.912	0.327	4.594	0.937
SiemensNovation	PD000181	52	Left	CC	9.3	19.45	37	0.478	0.268	4.391	0.939
SiemensNovation	PD000181	52	Right	CC	9.7	21.73	36	0.446	0.245	3.996	0.943
SiemensNovation	PD000181	52	Right	MLO	16.4	17.81	31	0.921	0.266	5.404	1.183
GE	PD000182	65	Left	CC	13	37.11	46	0.35	0.266	14.963	0.938
GE	PD000182	65	Right	CC	13	37.02	45	0.351	0.262	15.052	1.221
GE	PD000182	65	Right	CC	13	34.62	50	0.376	0.327	12.16	1.224
GE	PD000182	65	Left	MLO	14	15.23	55	0.919	0.396	6.476	1.298
GE	PD000182	65	Right	MLO	12	13.12	54	0.915	0.462	8.851	1.364
GE	PD000183	64	Right	CC	12	29.67	50	0.404	0.344	5.752	0.939
GE	PD000183	64	Left	MLO	13	11.16	47	1.165	0.528	4.804	0.995
GE	PD000183	64	Left	CC	9	15.18	46	0.593	0.414	4.146	1.002
GE	PD000183	64	Right	MLO	12	11.67	46	1.028	0.374	5.077	1.066
GE	PD000184	58	Left	CC	14	10.37	44	1.349	0.747	8.836	0.94
GE	PD000184	58	Left	CC	11	7.34	40	1.498	0.718	3.394	1.033
GE	PD000184	58	Left	MLO	13	7.57	48	1.718	0.961	4.331	1.085
GE	PD000184	58	Right	CC	12	10.33	52	1.162	0.838	3.867	1.164
GE	PD000184	58	Right	MLO	9	7.03	56	1.281	0.852	3.606	1.359
SiemensNovation	PD000185	78	Left	CC	7.5	7.72	41	0.972	0.549	4.68	0.941
SiemensNovation	PD000185	78	Left	MLO	9.3	6.96	48	1.337	0.68	4.297	1.064
GE	PD000186	57	Left	CC	17	36.48	56	0.466	0.468	7.01	0.941
GE	PD000186	57	Right	CC	14	27.86	50	0.502	0.425	7.935	0.955
GE	PD000186	57	Right	MLO	17	15.8	61	1.076	0.611	2.871	1.152
GE	PD000186	57	Left	MLO	18	16.84	67	1.069	0.758	3.838	1.233
GE	PD000187	48	Right	CC	10	59.65	48	0.168	0.135	27.852	0.941
GE	PD000187	48	Right	CC	7	32.85	53	0.213	0.195	33.569	1.359
GE	PD000187	48	Left	MLO	14	17.47	60	0.802	0.47	19.889	1.36
GE	PD000187	48	Right	MLO	12	17.07	58	0.703	0.412	22.64	1.404
GE	PD000187	48	Left	CC	13	41.5	61	0.313	0.34	22.381	1.453
GE	PD000188	69	Right	MLO	17	12.98	54	1.31	0.636	4.332	0.942
GE	PD000188	69	Left	MLO	17	12.73	46	1.335	0.561	7.166	1.021
GE	PD000188	69	Right	CC	10	12.36	39	0.809	0.416	5.976	1.16
GE	PD000188	69	Left	CC	14	14.48	38	0.967	0.465	4.406	1.373
SiemensNovation	PD000189	73	Right	CC	7.9	6.59	39	1.199	0.618	4.496	0.942
SiemensNovation	PD000189	73	Right	MLO	9.9	6.1	41	1.622	0.626	3.082	1.27
SiemensNovation	PD000190	54	Left	CC	8.8	27.18	40	0.324	0.229	4.526	0.942
SiemensNovation	PD000190	54	Left	MLO	10.8	13.49	30	0.801	0.264	7.079	1.173
SiemensNovation	PD000191	44	Left	CC	7.5	51.87	46	0.145	0.13	23.595	0.942
SiemensNovation	PD000191	44	Right	CC	7.1	35.48	56	0.2	0.196	28.454	1.415
SiemensNovation	PD000191	44	Left	MLO	7.4	15.49	51	0.478	0.25	22.87	1.782
SiemensNovation	PD000191	44	Right	MLO	6.8	13.33	52	0.51	0.291	23.34	1.796
GE	PD000192	41	Left	MLO	12	21.02	56	0.571	0.284	9.192	0.943
GE	PD000192	41	Right	CC	6	38.5	48	0.156	0.116	19.403	0.963
GE	PD000192	41	Left	CC	5	41.22	45	0.121	0.083	18.523	1.081
GE	PD000192	41	Right	MLO	9	14.61	58	0.616	0.312	10.322	1.144
SiemensNovation	PD000193	77	Left	MLO	12.8	12.75	36	1.004	0.409	4.145	0.943
SiemensNovation	PD000193	77	Right	CC	19.3	24.8	28	0.778	0.276	6.177	1.008
SiemensNovation	PD000193	77	Right	MLO	14.4	14.55	33	0.99	0.382	5.046	1.191
SiemensNovation	PD000193	77	Left	CC	15.7	19.43	31	0.808	0.324	4.319	1.194
GE	PD000194	71	Left	CC	17	77.45	40	0.22	0.167	17.089	0.944
GE	PD000194	71	Right	CC	12	47.26	44	0.254	0.177	17.958	1.009
GE	PD000194	71	Left	MLO	18	25.92	60	0.694	0.299	4.053	1.076
GE	PD000194	71	Right	MLO	17	26.51	56	0.641	0.283	8.538	1.162
SiemensNovation	PD000195	69	Left	CC	9	28.65	38	0.314	0.206	3.598	0.944
SiemensNovation	PD000195	69	Right	CC	9.5	29.95	34	0.317	0.176	5.041	1.189
SiemensNovation	PD000195	69	Right	MLO	12.3	15.13	35	0.813	0.244	4.438	1.193
SiemensNovation	PD000195	69	Left	MLO	9.8	13.31	39	0.736	0.31	4.215	1.251
Hologic	PD000196	58	Right	MLO	13.05	16.47	29	0.792	0.197	14.394	0.944
Hologic	PD000196	58	Left	MLO	5.29	8.31	38	0.637	0.241	12.738	1.002
Hologic	PD000196	58	Right	CC	6.97	26.82	32	0.26	0.142	10.121	1.027
Hologic	PD000196	58	Left	CC	3.96	15.25	35	0.26	0.162	13.783	1.219
HologicTomo	PD000196	58	Right	CC	6.97	31.67	32	0.22	0.129	11.186	1.299
HologicTomo	PD000196	58	Left	MLO	5.29	8.31	38	0.636	0.244	10.818	1.354
HologicTomo	PD000196	58	Right	MLO	13.05	16.43	29	0.794	0.198	11.577	1.36
HologicTomo	PD000196	58	Left	CC	3.96	15.58	35	0.254	0.16	10.892	1.497
GE	PD000197	57	Left	MLO	16	15.41	39	1.038	0.327	10.623	0.945
GE	PD000197	57	Right	MLO	16	19.99	40	0.8	0.339	9.807	0.996
GE	PD000197	57	Left	CC	7	16.13	31	0.434	0.183	16.394	1.087
GE	PD000197	57	Right	CC	7	20.92	34	0.335	0.171	16.878	1.123
GE	PD000198	52	Left	CC	14	30.25	57	0.463	0.483	6.678	0.946
GE	PD000198	52	Left	MLO	14	15.94	60	0.878	0.524	4.219	1.196
GE	PD000198	52	Right	CC	11	23.2	55	0.474	0.464	5.624	1.439
GE	PD000198	52	Right	MLO	8	9.39	64	0.852	0.582	5.403	1.51
SiemensNovation	PD000199	67	Right	CC	9.7	13.4	36	0.724	0.363	3.881	0.947
SiemensNovation	PD000199	67	Left	CC	8.8	11.32	34	0.777	0.355	4.377	1.197
SiemensNovation	PD000199	67	Left	MLO	9.3	10.48	41	0.888	0.38	8.6	1.211
SiemensNovation	PD000199	67	Right	MLO	10.9	10.18	41	1.071	0.37	3.708	1.26
GE	PD000200	70	Left	MLO	16	10.86	32	1.473	0.472	7.484	0.948
GE	PD000200	70	Left	CC	15	13.84	32	1.084	0.409	4.507	1.108
GE	PD000200	70	Right	MLO	14	8.07	38	1.735	0.538	3.273	1.193
GE	PD000200	70	Right	CC	15	12.27	33	1.222	0.47	3.758	1.248
GE	PD000201	61	Right	CC	18	38.88	57	0.463	0.454	7.417	0.949
GE	PD000201	61	Left	CC	16	28.3	53	0.565	0.49	7.397	1.048
GE	PD000201	61	Right	MLO	18	18.73	62	0.961	0.578	9.778	1.086
GE	PD000201	61	Left	MLO	15	15.96	63	0.94	0.589	6.972	1.205
GE	PD000201	60	Right	CC	12	30.19	54	0.397	0.37	6.675	2.455
GE	PD000201	60	Left	MLO	15	15.82	55	0.948	0.57	7.056	2.458
GE	PD000201	60	Left	CC	12	22.46	52	0.534	0.454	6.686	2.642
GE	PD000201	60	Right	MLO	14	14.11	62	0.992	0.507	5.582	3.005
SiemensNovation	PD000202	58	Left	CC	7.6	32.03	40	0.237	0.162	3.518	0.949
SiemensNovation	PD000202	58	Right	CC	8.7	23.68	52	0.367	0.363	6.734	1.373
SiemensNovation	PD000202	58	Left	MLO	9.7	21.16	51	0.458	0.326	9.752	1.459
SiemensNovation	PD000202	58	Right	MLO	17.5	20.48	44	0.854	0.397	12.638	1.809
GE	PD000203	58	Right	MLO	11	30.41	39	0.362	0.175	20.712	0.951
GE	PD000203	58	Right	CC	11	63.55	37	0.173	0.101	20.667	0.985
GE	PD000203	58	Left	MLO	13	25.62	42	0.507	0.215	22.343	1.152
GE	PD000203	58	Left	CC	11	52.47	44	0.21	0.151	26.333	1.292
SiemensNovation	PD000204	69	Right	CC	9.7	10.67	37	0.909	0.451	3.294	0.951
SiemensNovation	PD000204	69	Left	CC	9	10.29	40	0.875	0.488	2.342	0.958
SiemensNovation	PD000204	69	Left	MLO	9	7.77	45	1.159	0.594	4.72	1.112
SiemensNovation	PD000204	69	Right	MLO	8.8	8.17	43	1.077	0.58	3.026	1.13
GE	PD000205	57	Right	MLO	14	21.53	52	0.65	0.227	11.855	0.951
SiemensNovation	PD000205	55	Right	MLO	9.9	21.37	50	0.463	0.176	6.221	1.67
GE	PD000206	75	Left	CC	11	20.38	57	0.54	0.528	3.588	0.952
GE	PD000206	75	Left	MLO	10	10.12	66	0.988	0.774	4.965	1.042
SiemensNovation	PD000207	51	Left	CC	9.6	65.63	51	0.146	0.124	15.349	0.952
SiemensNovation	PD000207	51	Right	CC	8.1	48.9	58	0.166	0.166	23.755	0.977
SiemensNovation	PD000207	51	Left	MLO	18.5	37.31	46	0.496	0.307	22.834	1.958
SiemensNovation	PD000207	51	Right	MLO	18.9	27.44	60	0.689	0.417	13.754	2.916
SiemensNovation	PD000208	79	Left	CC	8	49.58	42	0.161	0.139	2.714	0.954
SiemensNovation	PD000208	79	Left	MLO	9.3	19.5	42	0.477	0.293	17.153	1.131
SiemensNovation	PD000208	79	Right	CC	11.2	31.01	43	0.361	0.277	2.527	1.131
SiemensNovation	PD000208	79	Right	MLO	12.5	20.72	41	0.603	0.357	16.066	1.146
GE	PD000209	67	Right	CC	12	53.37	42	0.225	0.145	13.977	0.954
GE	PD000209	67	Left	MLO	14	24.77	45	0.565	0.224	6.25	0.963
GE	PD000209	67	Left	CC	6	24.61	49	0.244	0.186	9.893	1.039
GE	PD000209	67	Right	MLO	11	18.03	52	0.61	0.259	8.129	1.076
GE	PD000210	46	Right	CC	9	38.93	36	0.231	0.137	14.526	0.955
GE	PD000210	46	Left	CC	8	25.04	43	0.319	0.218	11.541	0.977
GE	PD000210	46	Left	MLO	14	16.11	59	0.869	0.523	22.708	1.487
GE	PD000210	46	Right	MLO	15	17.86	62	0.84	0.403	13.542	1.544
GE	PD000210	45	Right	CC	16	44.67	37	0.358	0.209	12.353	1.577
GE	PD000210	45	Left	CC	16	42.43	47	0.377	0.284	14.405	1.735
GE	PD000210	45	Right	MLO	17	22.51	53	0.755	0.261	11.561	1.853
GE	PD000210	45	Left	MLO	12	12.98	67	0.924	0.686	22.576	2.971
GE	PD000211	48	Left	CC	9	37.95	44	0.237	0.181	15.759	0.957
GE	PD000211	48	Right	CC	7	25.24	49	0.277	0.226	9.237	1.085
GE	PD000211	48	Right	MLO	9	10.88	63	0.828	0.31	8.978	1.251
GE	PD000211	48	Left	MLO	7	8.2	64	0.854	0.413	9.204	1.359
GE	PD000212	44	Left	MLO	7	12.19	73	0.574	0.463	6.664	0.957
GE	PD000212	44	Right	CC	11	24.18	57	0.455	0.48	6.945	1.157
GE	PD000212	44	Left	CC	7	21.12	63	0.331	0.329	7.934	1.243
GE	PD000212	44	Right	MLO	13	15.29	67	0.85	0.658	6.388	1.373
SiemensNovation	PD000213	62	Right	CC	13.2	75.67	28	0.174	0.085	4.299	0.957
SiemensNovation	PD000213	62	Right	CC	11.6	20.75	29	0.559	0.218	3.899	1.281
SiemensNovation	PD000213	62	Left	MLO	17.4	13.06	37	1.333	0.502	4.515	1.57
SiemensNovation	PD000213	62	Left	CC	15.9	17.13	34	0.928	0.41	4.313	1.595
SiemensNovation	PD000213	62	Right	MLO	17.4	26.04	30	0.668	0.169	5.496	1.89
Hologic	PD000214	59	Right	CC	11.81	17.48	40	0.675	0.398	6.587	0.958
Hologic	PD000214	59	Left	CC	13.9	19.21	42	0.724	0.447	6.933	1.146
Hologic	PD000214	59	Right	MLO	14.46	11.46	44	1.262	0.547	6.393	1.434
Hologic	PD000214	59	Left	MLO	14.15	11.84	50	1.195	0.627	7.124	1.547
GE	PD000215	67	Right	CC	11	41.4	43	0.266	0.194	14.234	0.958
GE	PD000215	67	Left	CC	14	51.69	43	0.271	0.194	19.502	1.016
GE	PD000215	67	Left	MLO	8	14.27	41	0.561	0.292	17.034	1.078
GE	PD000215	67	Right	MLO	10	16.64	47	0.601	0.273	18.743	1.122
GE	PD000215	67	Right	MLO	16	21.13	47	0.757	0.255	15.716	1.158
GE	PD000215	66	Right	MLO	7	14	52	0.5	0.326	19.316	2.929
GE	PD000215	66	Left	MLO	6	10.11	53	0.593	0.318	16.338	3.006
GE	PD000215	66	Left	CC	8	31.21	47	0.256	0.225	16.541	3.083
GE	PD000215	66	Right	MLO	6	12.1	49	0.496	0.249	22.999	3.49
GE	PD000215	66	Right	CC	8	27.39	42	0.292	0.223	14.246	3.766
GE	PD000216	56	Right	CC	15	14.08	39	1.066	0.526	5.288	0.96
GE	PD000216	56	Right	MLO	14	11.41	60	1.227	0.701	4.68	1.37
GE	PD000217	56	Left	CC	7	35.33	29	0.198	0.09	18.451	0.961
GE	PD000217	56	Left	MLO	9	14.78	28	0.609	0.111	14.26	0.976
GE	PD000217	56	Right	MLO	16	45.28	32	0.353	0.101	14.255	1.024
GE	PD000217	56	Right	MLO	17	42.98	41	0.396	0.118	10.642	1.209
SiemensNovation	PD000218	42	Left	CC	6.8	35.31	47	0.193	0.16	23.706	0.961
SiemensNovation	PD000218	42	Right	CC	7.7	37.78	44	0.204	0.158	25.673	1.15
SiemensNovation	PD000218	42	Left	MLO	8.5	18.29	48	0.465	0.208	17.59	1.216
SiemensNovation	PD000218	42	Right	MLO	8.8	17.61	48	0.5	0.198	15.945	1.221
GE	PD000219	50	Left	MLO	15	24.77	39	0.606	0.135	12.454	0.962
SiemensNovation	PD000219	49	Right	MLO	9	16.03	36	0.561	0.187	22.092	1.045
GE	PD000219	50	Left	CC	9	37.62	31	0.239	0.118	21.108	1.061
GE	PD000219	50	Right	MLO	17	27.4	49	0.62	0.225	12.097	1.117
GE	PD000219	50	Right	CC	9	36.06	33	0.25	0.127	19.973	1.196
GE	PD000219	50	Right	MLO	14	19.76	51	0.708	0.309	9.904	1.263
SiemensNovation	PD000219	49	Left	CC	10.4	35.2	26	0.295	0.114	26.679	1.329
SiemensNovation	PD000219	49	Left	MLO	11.1	18.82	27	0.59	0.137	19.883	1.374
SiemensNovation	PD000219	49	Right	CC	9.1	35.1	29	0.259	0.12	21.647	1.662
Hologic	PD000220	69	Right	CC	7.117	9.41	40	0.756	0.435	6.848	0.963
Hologic	PD000220	69	Left	CC	8.318	21.83	34	0.381	0.203	9.022	1.132
Hologic	PD000220	69	Left	MLO	11.966	23.38	39	0.512	0.245	9.229	1.2
Hologic	PD000220	69	Right	MLO	11.476	8.94	46	1.284	0.562	5.863	1.367
Hologic	PD000221	54	Right	CC	3.37	17.24	40	0.195	0.129	17.828	0.966
Hologic	PD000221	54	Right	MLO	8.52	13.55	48	0.629	0.276	14.221	1.206
HologicTomo	PD000221	54	Right	CC	3.37	17.4	40	0.194	0.129	12.038	1.465
HologicTomo	PD000221	54	Right	MLO	8.52	13.71	48	0.621	0.229	10.789	1.647
GE	PD000222	58	Right	MLO	18	18.09	43	0.995	0.359	14.16	0.967
GE	PD000222	58	Right	CC	17	31.32	43	0.543	0.35	12.265	1.001
GE	PD000222	58	Left	CC	15	29.72	42	0.505	0.319	18.176	1.079
SiemensNovation	PD000222	58	Right	CC	12.6	60.59	34	0.208	0.136	11.445	1.169
GE	PD000222	58	Left	MLO	16	16.78	46	0.954	0.397	15.315	1.247
Hologic	PD000223	51	Right	CC	7.918	23.25	24	0.34	0.114	9.728	0.968
Hologic	PD000223	51	Right	MLO	10.053	11.39	25	0.883	0.172	13.997	0.974
Hologic	PD000224	71	Left	CC	16.87	30.27	29	0.557	0.222	6.011	0.968
Hologic	PD000224	71	Left	MLO	17.51	20.06	37	0.873	0.251	5.775	1.056
SiemensNovation	PD000224	69	Right	CC	8.4	17.7	47	0.475	0.385	3.931	1.148
Hologic	PD000224	71	Right	MLO	17.5	18.85	39	0.928	0.346	7.508	1.163
Hologic	PD000224	71	Right	CC	16.92	26.9	33	0.629	0.289	5.571	1.303
SiemensNovation	PD000224	69	Left	MLO	13.4	20.45	52	0.655	0.452	11.64	1.323
SiemensNovation	PD000224	69	Left	CC	9.7	27.41	44	0.354	0.283	3.267	1.4
SiemensNovation	PD000224	69	Right	MLO	10.7	15.05	59	0.711	0.544	6.366	1.44
GE	PD000225	75	Right	MLO	12	12.82	50	0.936	0.487	11.682	0.969
GE	PD000225	75	Left	MLO	12	11.82	48	1.015	0.523	12.179	0.994
GE	PD000225	75	Right	CC	11	19	40	0.579	0.328	9.12	0.996
GE	PD000225	75	Left	CC	11	16.24	41	0.678	0.384	8.438	1.023
GE	PD000225	75	Left	CC	12	18.02	41	0.666	0.38	8.96	1.071
GE	PD000225	75	Right	CC	9	15.63	42	0.576	0.35	11.467	1.132
GE	PD000226	56	Right	CC	11	41.3	50	0.266	0.229	6.577	0.969
GE	PD000226	56	Left	CC	8	24.41	58	0.328	0.33	5.824	1.074
GE	PD000226	56	Left	MLO	11	13.63	61	0.807	0.413	4.609	1.148
GE	PD000226	54	Left	CC	17	57.84	47	0.294	0.243	6.602	1.229
GE	PD000226	54	Right	CC	16	64.17	45	0.249	0.192	6.618	1.266
GE	PD000226	56	Right	MLO	10	12.92	65	0.774	0.403	6.16	1.32
GE	PD000226	54	Right	MLO	16	19.42	66	0.824	0.423	4.871	1.568
GE	PD000226	54	Left	MLO	17	20.3	64	0.838	0.395	3.902	1.624
GE	PD000227	65	Left	CC	13	47.63	44	0.273	0.189	14.582	0.97
GE	PD000227	65	Right	CC	10	34	46	0.294	0.213	15.492	1.091
GE	PD000227	65	Right	MLO	11	14	57	0.786	0.387	10.351	1.128
GE	PD000227	65	Left	MLO	12	15.08	57	0.796	0.37	9.267	1.183
GE	PD000228	68	Left	MLO	12	11.62	40	1.033	0.479	10.322	0.971
GE	PD000228	68	Right	MLO	14	13.26	39	1.056	0.481	6.18	1.046
GE	PD000228	68	Right	CC	11	17.21	39	0.639	0.342	9.813	1.121
GE	PD000228	68	Left	CC	11	16.17	39	0.68	0.359	9.925	1.232
GE	PD000229	51	Right	MLO	17	11.81	45	1.44	0.573	4.78	0.974
GE	PD000229	51	Left	CC	18	18.53	43	0.971	0.552	5.375	1.044
GE	PD000229	51	Left	MLO	13	9.52	51	1.366	0.591	9.18	1.095
GE	PD000229	51	Right	CC	17	16.26	41	1.046	0.55	4.162	1.162
GE	PD000230	64	Right	CC	12	32.51	44	0.369	0.267	14.314	0.976
GE	PD000230	64	Right	MLO	15	17.37	58	0.864	0.416	7.367	1.023
GE	PD000230	64	Left	MLO	14	18.76	60	0.746	0.377	10.077	1.049
GE	PD000230	64	Left	CC	10	40.41	41	0.247	0.185	15.163	1.221
GE	PD000231	67	Right	CC	13	10.85	42	1.198	0.636	5.207	0.976
GE	PD000231	67	Left	CC	9	7.9	45	1.139	0.676	5.164	1.025
GE	PD000231	67	Left	MLO	13	7.87	51	1.653	0.759	2.912	1.051
GE	PD000231	67	Right	MLO	14	8.44	54	1.659	0.97	2.961	1.179
SiemensNovation	PD000232	58	Left	CC	9	5.66	57	1.589	1.31	4.926	1.475
SiemensNovation	PD000232	58	Left	CC	9	5.66	57	1.589	1.31	4.926	1.475
SiemensNovation	PD000232	58	Right	CC	8.2	5.52	57	1.485	1.216	4.073	1.486
SiemensNovation	PD000232	58	Right	CC	8.2	5.52	57	1.485	1.216	4.073	1.486
SiemensNovation	PD000232	58	Right	MLO	6.8	4.8	67	1.418	1.577	6.067	1.489
SiemensNovation	PD000232	58	Right	MLO	13.3	6.74	65	1.973	1.439	4.296	2.071
SiemensNovation	PD000232	58	Right	MLO	13.3	6.74	65	1.973	1.439	4.296	2.071
SiemensNovation	PD000232	58	Left	MLO	14.7	6.9	59	2.13	1.264	4.743	2.356
SiemensNovation	PD000232	58	Left	MLO	14.7	6.9	59	2.13	1.264	4.743	2.356
GE	PD000233	71	Right	CC	11	12.82	48	0.858	0.581	5.685	0.977
GE	PD000233	71	Left	CC	14	16.87	54	0.83	0.662	6.13	1.017
GE	PD000233	71	Left	MLO	15	10.95	55	1.37	0.678	4.377	1.032
GE	PD000233	71	Right	MLO	9	7.35	54	1.224	0.71	4.793	1.032
GE	PD000233	71	Right	CC	13	15.4	53	0.844	0.651	5.622	1.076
GE	PD000234	63	Right	CC	10	22.24	59	0.45	0.416	6.826	0.977
GE	PD000234	63	Left	CC	9	16.84	65	0.534	0.569	4.885	1.209
GE	PD000234	63	Left	MLO	11	10.87	89	1.012	1.03	5.588	1.393
GE	PD000234	63	Right	MLO	13	13.09	81	0.993	0.848	5.143	1.442
GE	PD000235	70	Right	CC	11	18.28	62	0.602	0.653	3.165	0.977
GE	PD000235	70	Left	CC	10	17.62	61	0.568	0.611	3.581	1.057
GE	PD000235	70	Right	MLO	11	9.6	78	1.146	0.938	4.401	1.148
GE	PD000235	70	Left	MLO	11	10.33	65	1.065	0.772	3.398	1.339
GE	PD000235	68	Right	CC	13	24.99	57	0.52	0.513	3.363	2.381
GE	PD000235	68	Left	CC	13	22.32	55	0.583	0.53	3.736	2.986
GE	PD000235	68	Right	MLO	14	10.62	65	1.319	0.963	2.987	3.134
GE	PD000235	68	Left	MLO	12	9.15	65	1.311	0.945	3.921	3.357
SiemensNovation	PD000236	66	Left	CC	12	17.91	30	0.67	0.266	11.203	0.977
SiemensNovation	PD000236	66	Right	CC	12.8	21.41	23	0.598	0.172	13.258	1.23
SiemensNovation	PD000236	66	Right	MLO	17.8	17.61	24	1.011	0.185	11.998	1.234
SiemensNovation	PD000236	66	Left	MLO	17.4	15.18	31	1.146	0.27	9.361	1.479
GE	PD000237	56	Right	CC	11	24.22	53	0.454	0.384	12.505	0.978
GE	PD000237	56	Right	MLO	14	13.94	76	1.005	0.807	8.516	1.133
GE	PD000237	56	Left	CC	11	22.47	59	0.49	0.474	7.164	1.138
GE	PD000237	56	Left	MLO	16	14.77	79	1.084	0.828	10.339	1.372
GE	PD000238	54	Right	CC	13	46.03	45	0.282	0.224	8.665	0.979
SiemensNovation	PD000238	53	Right	MLO	8.1	13.89	55	0.583	0.34	5.84	1.384
SiemensNovation	PD000238	53	Right	CC	5.5	22.29	50	0.247	0.225	5.655	1.391
GE	PD000238	54	Right	MLO	17	22.02	62	0.772	0.409	4.475	1.401
GE	PD000239	62	Right	MLO	12	10.55	50	1.137	0.58	7.143	0.979
GE	PD000239	62	Right	CC	14	20	43	0.7	0.425	10.113	0.984
GE	PD000239	62	Right	CC	10	15.27	47	0.655	0.462	9.415	1.076
SiemensNovation	PD000240	65	Right	CC	7.9	27.02	33	0.292	0.16	8.967	0.98
SiemensNovation	PD000240	65	Right	MLO	16	17.19	30	0.931	0.204	9.868	0.98
SiemensNovation	PD000240	65	Left	CC	10.5	27.17	30	0.386	0.169	7.122	0.997
SiemensNovation	PD000240	65	Left	MLO	9.5	15.4	34	0.617	0.231	6.342	1.007
GE	PD000240	64	Left	MLO	8	13.59	38	0.589	0.283	6.067	1.811
GE	PD000240	64	Left	MLO	11	14.99	49	0.734	0.303	5.308	1.89
GE	PD000240	64	Left	CC	3	9.83	38	0.305	0.189	7.686	2.257
GE	PD000240	64	Right	CC	9	23.92	40	0.376	0.239	9.131	2.349
GE	PD000240	64	Right	MLO	6	7.56	52	0.794	0.294	9.764	2.821
Hologic	PD000241	63	Right	CC	14.41	17.57	38	0.82	0.435	6.957	0.98
Hologic	PD000241	63	Left	CC	14.91	14.88	34	1.002	0.442	7.786	1.187
Hologic	PD000241	63	Right	MLO	17.63	15.98	49	1.103	0.534	7.422	1.397
HologicTomo	PD000241	63	Right	CC	14.41	17.49	38	0.824	0.436	6.085	1.419
Hologic	PD000241	63	Left	MLO	17.91	15.95	47	1.123	0.587	6.927	1.452
HologicTomo	PD000241	63	Left	CC	14.91	14.92	34	0.999	0.442	7.189	1.453
HologicTomo	PD000241	63	Left	MLO	17.91	15.91	47	1.126	0.603	6.515	1.856
HologicTomo	PD000241	63	Right	MLO	17.63	16.07	49	1.097	0.564	5.349	1.88
GE	PD000242	72	Right	CC	16	33.87	46	0.472	0.357	5.862	0.981
GE	PD000242	72	Right	MLO	17	15.4	60	1.104	0.639	6.116	1.202
SiemensNovation	PD000243	58	Right	CC	12.8	51.27	35	0.25	0.156	8.522	0.982
SiemensNovation	PD000243	58	Left	MLO	16.6	24.1	30	0.689	0.207	9.216	0.983
SiemensNovation	PD000243	58	Left	CC	11.3	40.46	33	0.279	0.154	5.829	1.002
SiemensNovation	PD000243	58	Left	MLO	14.1	50.7	34	0.278	0.139	6.582	1.015
SiemensNovation	PD000243	58	Right	MLO	18.2	26.12	34	0.697	0.233	12.696	1.442
GE	PD000244	44	Left	MLO	12	15.86	40	0.757	0.268	13.098	0.982
GE	PD000244	44	Left	CC	10	33.12	35	0.302	0.167	14.612	1.081
GE	PD000244	44	Right	CC	7	31.38	36	0.223	0.134	15.181	1.107
GE	PD000244	44	Right	MLO	15	23.14	40	0.648	0.251	13.485	1.11
Hologic	PD000245	73	Right	CC	10.72	13.14	40	0.816	0.467	5.275	0.983
Hologic	PD000245	73	Left	CC	15.791	18.33	39	0.862	0.469	5.647	1.078
Hologic	PD000245	73	Left	MLO	17.437	10.52	46	1.657	0.775	7.443	1.247
Hologic	PD000245	73	Right	MLO	17.215	9.96	52	1.729	0.915	5.978	1.579
Hologic	PD000246	65	Right	CC	12.9	24.04	37	0.537	0.299	6.503	0.983
Hologic	PD000246	65	Left	CC	17.437	12.38	46	1.409	0.878	5.613	1.34
Hologic	PD000246	65	Left	MLO	17.837	10.24	61	1.741	1.324	4.66	2.565
Hologic	PD000246	65	Right	MLO	17.615	15.75	68	1.118	0.894	11.423	2.716
SiemensNovation	PD000247	52	Left	MLO	9.9	16.79	49	0.59	0.247	10.076	0.985
Hologic	PD000247	53	Right	MLO	11.73	13.13	40	0.893	0.338	8.646	1.125
Hologic	PD000247	53	Right	MLO	11.73	13.13	40	0.893	0.338	8.646	1.125
Hologic	PD000247	53	Right	CC	9.57	26.08	44	0.367	0.288	11.464	1.125
Hologic	PD000247	53	Right	CC	9.57	26.08	44	0.367	0.288	11.464	1.125
SiemensNovation	PD000247	52	Left	CC	10.9	29.58	37	0.368	0.221	6.533	1.225
SiemensNovation	PD000247	52	Right	MLO	10.9	14.34	44	0.76	0.422	9.596	1.333
SiemensNovation	PD000247	52	Right	CC	9.8	27.07	44	0.362	0.282	6.186	1.372
HologicTomo	PD000247	53	Right	MLO	11.73	13.22	40	0.888	0.359	8.265	1.519
HologicTomo	PD000247	53	Right	CC	9.57	25.3	44	0.378	0.293	9.589	1.623
SiemensNovation	PD000248	57	Right	MLO	18.7	22.71	30	0.823	0.216	9.294	0.985
SiemensNovation	PD000248	57	Right	MLO	18.7	22.71	30	0.823	0.216	9.294	0.985
SiemensNovation	PD000248	57	Right	CC	10.2	18.76	29	0.544	0.215	7.541	1.002
SiemensNovation	PD000248	57	Right	CC	10.2	18.76	29	0.544	0.215	7.541	1.002
GE	PD000249	62	Left	CC	15	42	52	0.357	0.336	12.956	0.986
GE	PD000249	62	Right	CC	13	41.8	51	0.311	0.275	10.083	1.01
GE	PD000249	62	Right	MLO	13	16.09	63	0.808	0.485	8.962	1.197
GE	PD000249	62	Left	MLO	16	17.01	63	0.941	0.67	8.919	1.326
GE	PD000250	45	Left	CC	9	22.41	41	0.402	0.265	15.828	0.986
GE	PD000250	45	Left	MLO	16	18.31	50	0.874	0.344	11.559	1.196
GE	PD000250	45	Right	MLO	12	30.44	62	0.394	0.154	16.241	1.5
GE	PD000251	62	Right	CC	8	42.61	31	0.188	0.097	21.827	0.989
GE	PD000251	62	Left	CC	14	57.06	31	0.245	0.121	18.562	1.052
GE	PD000251	62	Right	MLO	10	14.27	32	0.701	0.2	15.684	1.118
GE	PD000251	62	Left	MLO	15	18.27	33	0.821	0.255	14.52	1.19
GE	PD000252	54	Right	CC	15	17.81	39	0.842	0.432	6.386	0.991
GE	PD000252	54	Right	MLO	13	10.67	52	1.218	0.504	5.692	1.072
GE	PD000252	54	Left	CC	13	14.52	39	0.895	0.457	5.547	1.124
GE	PD000252	54	Left	MLO	13	10.91	45	1.191	0.475	6.571	1.302
GE	PD000253	63	Left	CC	17	37.5	45	0.453	0.325	7.573	0.991
GE	PD000253	63	Left	MLO	17	17.84	50	0.953	0.464	7.934	1.007
GE	PD000253	63	Right	CC	16	43.94	40	0.364	0.234	11.789	1.035
GE	PD000253	63	Right	MLO	17	21.69	50	0.784	0.299	10.101	1.227
GE	PD000254	77	Left	MLO	12	17.57	36	0.683	0.292	9.921	0.992
GE	PD000254	77	Left	CC	12	40.98	34	0.293	0.154	13.078	1.258
SiemensNovation	PD000254	76	Left	MLO	14	24.11	31	0.581	0.152	7.272	1.482
SiemensNovation	PD000254	76	Left	CC	9.6	42.72	33	0.225	0.131	5.744	1.501
GE	PD000255	67	Left	CC	15	30.61	46	0.49	0.357	6.58	0.992
GE	PD000255	67	Left	CC	15	30.61	46	0.49	0.357	6.58	0.992
GE	PD000255	67	Left	MLO	16	16.44	52	0.973	0.517	6.274	1.006
GE	PD000255	67	Left	MLO	16	16.44	52	0.973	0.517	6.274	1.006
GE	PD000256	69	Left	CC	10	15.72	51	0.636	0.505	7.69	0.993
GE	PD000256	69	Right	CC	13	21.61	49	0.602	0.457	8.759	1.032
GE	PD000256	69	Right	MLO	10	9.32	71	1.073	0.681	11.185	1.344
GE	PD000256	69	Left	MLO	12	10.8	60	1.111	0.663	7.534	1.374
GE	PD000257	62	Right	CC	9	27.27	42	0.33	0.236	17.487	0.993
GE	PD000257	62	Right	MLO	11	15.66	51	0.702	0.361	9.967	1.062
GE	PD000257	61	Right	CC	13	46.04	38	0.282	0.18	15.293	2.228
GE	PD000257	61	Right	MLO	12	17.32	46	0.693	0.335	9.564	2.498
SiemensNovation	PD000258	78	Left	MLO	17.4	8.69	26	2.003	0.55	8.922	0.994
SiemensNovation	PD000258	78	Right	CC	10.7	7.11	28	1.504	0.491	7.621	1.003
SiemensNovation	PD000258	78	Left	CC	11.8	7.46	24	1.582	0.428	7.552	1.262
SiemensNovation	PD000258	78	Right	MLO	15.8	8.9	29	1.776	0.564	7.52	1.506
GE	PD000259	57	Left	CC	7	32.94	44	0.212	0.147	11.505	0.994
GE	PD000259	57	Left	MLO	18	24.72	46	0.728	0.233	6.318	0.996
GE	PD000259	57	Right	MLO	17	26.46	40	0.642	0.141	6.981	1.017
GE	PD000259	57	Right	CC	12	63.59	37	0.189	0.112	15.668	1.173
GE	PD000260	59	Left	CC	15	26.93	41	0.557	0.332	12.464	0.995
GE	PD000260	59	Left	MLO	16	16.58	40	0.965	0.367	11.164	1.013
GE	PD000260	59	Right	CC	13	26.65	43	0.488	0.321	10.154	1.055
GE	PD000260	59	Right	MLO	16	15.84	42	1.01	0.378	8.04	1.089
GE	PD000261	63	Right	CC	13	48.67	51	0.267	0.225	8.703	0.995
GE	PD000261	63	Left	CC	10	38.93	49	0.257	0.208	8.228	1.072
GE	PD000261	63	Right	MLO	12	13.49	70	0.889	0.491	6.544	1.203
GE	PD000261	63	Left	MLO	13	16.43	63	0.791	0.568	7.321	1.333
GE	PD000261	62	Right	CC	12	48.47	48	0.248	0.192	7.665	2.14
GE	PD000261	62	Right	MLO	14	17.08	67	0.82	0.457	6.151	2.783
GE	PD000261	62	Left	MLO	14	16.19	65	0.865	0.545	7.93	2.954
GE	PD000261	62	Left	CC	13	42.79	53	0.304	0.267	10.299	2.955
GE	PD000261	62	Left	MLO	14	16.64	65	0.841	0.62	7.903	3.016
GE	PD000262	35	Right	CC	7	33.25	57	0.211	0.197	22.34	0.997
GE	PD000262	35	Right	MLO	10	14.37	60	0.696	0.455	13.889	1.362
SiemensNovation	PD000263	80	Left	CC	9	16.86	33	0.534	0.252	8.001	0.997
SiemensNovation	PD000263	80	Left	MLO	18	20.44	33	0.88	0.286	8.795	1.489
GE	PD000264	52	Right	MLO	12	19.32	52	0.621	0.226	10.122	0.997
GE	PD000264	52	Left	MLO	12	14.65	54	0.819	0.332	7.057	1.066
GE	PD000264	52	Left	CC	9	23.1	52	0.39	0.34	5.779	1.116
GE	PD000264	52	Right	CC	7	25.84	40	0.271	0.171	14.695	1.209
GE	PD000265	39	Right	MLO	12	20.65	40	0.581	0.163	14.878	0.998
GE	PD000265	39	Right	CC	10	40.96	35	0.244	0.149	20.992	1.213
SiemensNovation	PD000266	64	Right	CC	14.6	27	28	0.541	0.203	7.591	0.998
SiemensNovation	PD000266	64	Right	MLO	16.7	14.26	44	1.171	0.425	6.595	1.464
GE	PD000267	48	Right	CC	7	11.66	68	0.6	0.755	3.801	0.999
GE	PD000267	48	Right	CC	7	11.66	68	0.6	0.755	3.801	0.999
GE	PD000267	48	Left	CC	7	9.83	62	0.712	0.743	5.492	1.14
GE	PD000267	48	Left	CC	7	9.83	62	0.712	0.743	5.492	1.14
GE	PD000267	48	Left	MLO	13	11.74	70	1.107	0.883	3.348	1.325
GE	PD000267	48	Left	MLO	13	11.74	70	1.107	0.883	3.348	1.325
GE	PD000267	48	Right	MLO	10	9.51	73	1.051	0.945	3.64	1.497
GE	PD000267	48	Right	MLO	10	9.51	73	1.051	0.945	3.64	1.497
GE	PD000268	47	Left	CC	9	16.87	48	0.534	0.407	8.348	1
GE	PD000268	47	Right	CC	11	25.44	52	0.432	0.391	7.509	1.079
GE	PD000268	47	Left	MLO	13	13.64	56	0.953	0.559	7.53	1.091
GE	PD000268	47	Right	MLO	14	16.14	61	0.867	0.577	7.273	1.141
GE	PD000268	45	Left	MLO	18	20.5	53	0.878	0.527	9.147	1.692
GE	PD000268	45	Right	CC	13	26.82	61	0.485	0.503	8.514	1.932
GE	PD000268	45	Right	MLO	14	14.97	71	0.935	0.71	6.802	2.13
GE	PD000268	45	Left	CC	13	24.42	50	0.532	0.438	8.827	2.219
SiemensNovation	PD000269	71	Left	CC	14	23.06	33	0.607	0.281	7.512	1
SiemensNovation	PD000269	71	Right	CC	14	23.13	32	0.605	0.267	6.457	1.007
SiemensNovation	PD000269	71	Left	MLO	12.7	10.79	41	1.177	0.404	6.3	1.231
SiemensNovation	PD000269	71	Right	MLO	12.9	11.01	49	1.172	0.43	5.28	1.743
SiemensNovation	PD000270	58	Right	MLO	10.1	16.42	45	0.615	0.285	17.956	1.001
SiemensNovation	PD000270	58	Left	MLO	11.7	16.19	45	0.723	0.324	14.372	1.381
SiemensNovation	PD000270	58	Right	CC	11.9	31.21	39	0.381	0.25	10.476	1.468
SiemensNovation	PD000270	58	Left	CC	10.9	33.5	42	0.325	0.245	6.733	1.823
GE	PD000271	54	Left	CC	16	28.9	50	0.554	0.454	7.59	1.002
GE	PD000271	54	Right	MLO	14	13.37	48	1.047	0.526	7.793	1.04
GE	PD000271	54	Right	CC	15	31.03	50	0.483	0.412	7.266	1.104
GE	PD000271	54	Left	MLO	17	15.1	53	1.126	0.477	5.659	1.104
GE	PD000272	51	Left	MLO	17	20.42	41	0.832	0.24	11.554	1.002
GE	PD000272	51	Left	CC	13	68.35	33	0.19	0.108	15.666	1.116
GE	PD000272	51	Right	MLO	18	24.44	47	0.736	0.268	12.005	1.124
GE	PD000272	51	Right	CC	13	51.86	35	0.251	0.151	16.115	1.158
SiemensNovation	PD000273	69	Right	MLO	7.4	11.15	48	0.664	0.36	11.199	1.002
SiemensNovation	PD000273	70	Left	MLO	8.1	10.47	42	0.774	0.347	7.784	1.217
SiemensNovation	PD000273	70	Right	CC	8.6	23.93	43	0.359	0.273	17.337	1.239
SiemensNovation	PD000273	69	Right	CC	5.6	16.32	54	0.343	0.345	19.282	1.251
SiemensNovation	PD000273	70	Right	MLO	8.6	10	43	0.86	0.322	11.532	1.306
SiemensNovation	PD000273	69	Left	CC	7.2	21.71	59	0.332	0.383	7.785	1.411
SiemensNovation	PD000273	69	Left	MLO	9.9	12.01	42	0.824	0.358	8.102	1.516
SiemensNovation	PD000273	70	Left	CC	8.7	25.09	45	0.347	0.283	7.942	1.603
Hologic	PD000274	61	Left	CC	14.61	20.41	44	0.716	0.477	4.44	1.002
Hologic	PD000274	61	Right	CC	13.18	19.31	49	0.683	0.542	4.027	1.139
Hologic	PD000274	61	Left	MLO	9.18	11.07	58	0.829	0.647	3.25	1.5
Hologic	PD000274	61	Right	MLO	12.45	14.53	60	0.857	0.704	3.762	1.841
GE	PD000275	64	Left	CC	8	12.96	57	0.617	0.59	2.743	1.003
GE	PD000275	64	Right	CC	6	10.08	55	0.595	0.539	4.121	1.127
GE	PD000275	64	Left	MLO	16	13.15	63	1.217	0.76	4.213	1.223
GE	PD000275	64	Right	MLO	17	14.21	71	1.196	0.903	7.044	1.52
GE	PD000276	67	Right	CC	10	25.91	48	0.386	0.32	8.427	1.003
GE	PD000276	67	Left	MLO	13	13.03	57	0.998	0.442	6.482	1.09
GE	PD000276	67	Right	MLO	12	13.08	55	0.917	0.422	7.307	1.22
GE	PD000276	67	Left	CC	11	27.16	54	0.405	0.387	7.139	1.251
GE	PD000277	55	Right	CC	13	17.73	58	0.733	0.689	7.404	1.003
GE	PD000277	55	Right	MLO	13	12.23	59	1.063	0.744	7.123	1.087
GE	PD000277	55	Left	CC	14	18.22	55	0.769	0.653	6.388	1.151
GE	PD000277	55	Left	MLO	16	12.87	66	1.244	0.935	4.624	1.177
SiemensNovation	PD000278	61	Left	CC	6.3	39.98	43	0.158	0.11	18.792	1.003
SiemensNovation	PD000278	61	Left	MLO	6.7	13.2	55	0.508	0.187	14.711	1.53
SiemensNovation	PD000278	61	Right	MLO	8.4	12.71	63	0.661	0.516	12.498	1.641
SiemensNovation	PD000278	61	Right	CC	12.4	40.88	53	0.303	0.279	24.588	1.794
Hologic	PD000279	64	Right	CC	15.64	24.88	43	0.629	0.417	4.891	1.004
Hologic	PD000279	64	Left	CC	17.29	23.09	42	0.749	0.463	5.062	1.094
Hologic	PD000279	64	Left	MLO	18.21	13.66	60	1.333	0.74	5.052	2.277
Hologic	PD000279	64	Right	MLO	16.93	14.68	67	1.153	0.841	5.939	2.755
SiemensNovation	PD000280	64	Right	CC	14.8	10.09	32	1.467	0.567	7.553	1.005
SiemensNovation	PD000280	64	Right	MLO	18	9.82	39	1.833	0.733	6.169	1.241
SiemensNovation	PD000280	64	Left	MLO	16.4	8.83	43	1.856	0.868	6.806	1.479
SiemensNovation	PD000280	64	Left	CC	15.3	9.48	32	1.613	0.617	5.025	1.588
GE	PD000281	50	Right	CC	11	28.38	49	0.388	0.306	5.365	1.005
GE	PD000281	50	Left	CC	15	29.15	52	0.515	0.446	6.409	1.027
GE	PD000281	50	Right	MLO	15	16.55	68	0.906	0.673	5.475	1.169
GE	PD000281	50	Left	MLO	15	17.03	70	0.881	0.742	6.866	1.174
GE	PD000282	59	Left	MLO	15	15.76	56	0.952	0.511	5.338	1.005
GE	PD000282	59	Right	CC	10	21.26	44	0.47	0.323	14.024	1.025
GE	PD000282	59	Left	CC	13	26.08	45	0.498	0.348	12.459	1.108
GE	PD000282	59	Right	MLO	16	17.25	57	0.928	0.56	5.991	1.195
GE	PD000283	50	Right	CC	8	25.69	49	0.311	0.259	21.722	1.006
GE	PD000283	50	Left	MLO	14	16	48	0.875	0.457	8.417	1.08
GE	PD000283	50	Left	CC	8	24.19	51	0.331	0.29	20.761	1.137
GE	PD000283	50	Right	MLO	13	14.54	51	0.894	0.41	8.09	1.336
Hologic	PD000284	68	Left	CC	11.21	35.26	37	0.318	0.194	9.498	1.007
Hologic	PD000284	68	Right	CC	7.78	25.2	42	0.309	0.22	9.006	1.082
HologicTomo	PD000284	68	Left	CC	11.21	35.47	37	0.316	0.194	8.874	1.31
Hologic	PD000284	68	Right	MLO	17.42	17.43	47	1	0.414	5.742	1.444
Hologic	PD000284	68	Left	MLO	14.77	15.15	47	0.975	0.274	4.09	1.446
HologicTomo	PD000284	68	Right	CC	7.78	25.32	42	0.307	0.218	7.134	1.678
HologicTomo	PD000284	68	Left	MLO	14.77	15.01	47	0.984	0.31	4.152	1.852
HologicTomo	PD000284	68	Right	MLO	17.42	17.27	47	1.009	0.366	4.61	1.853
Hologic	PD000285	50	Right	CC	3.71	12.58	41	0.295	0.223	9.368	1.007
Hologic	PD000285	50	Left	CC	9.71	20.53	48	0.473	0.397	5.926	1.101
Hologic	PD000285	50	Right	MLO	15.56	19.81	33	0.785	0.264	12.799	1.322
Hologic	PD000285	50	Left	MLO	15.92	15.84	46	1.005	0.452	6.136	1.538
GE	PD000286	50	Right	CC	11	25.91	62	0.424	0.441	7.026	1.007
GE	PD000286	50	Left	CC	11	22.3	67	0.493	0.57	6.644	1.096
GE	PD000286	50	Right	CC	10	22.98	59	0.435	0.439	6.56	1.199
GE	PD000286	50	Right	MLO	12	12.6	68	0.953	0.647	6.958	1.264
GE	PD000286	50	Left	MLO	15	16.16	72	0.928	0.64	6.614	1.451
GE	PD000287	55	Right	CC	12	11.98	57	1.002	0.841	3.701	1.007
GE	PD000287	55	Left	CC	10	10.99	59	0.91	0.826	4.228	1.095
GE	PD000287	55	Right	MLO	10	7.2	69	1.39	1.196	2.443	1.195
GE	PD000287	55	Left	MLO	14	10.31	70	1.358	1.102	2.412	1.24
GE	PD000288	54	Right	CC	11	62.97	49	0.175	0.133	15.666	1.008
GE	PD000288	54	Left	CC	12	65.11	46	0.184	0.133	19.09	1.061
SiemensNovation	PD000288	53	Left	CC	5.4	27.12	56	0.199	0.189	10.709	1.098
GE	PD000288	54	Left	MLO	18	24.51	58	0.734	0.35	7.548	1.174
GE	PD000288	54	Right	MLO	17	24.23	59	0.702	0.438	12.907	1.251
SiemensNovation	PD000288	53	Left	MLO	8.4	13.72	58	0.612	0.359	12.637	1.608
SiemensNovation	PD000288	53	Right	CC	7.9	39.07	60	0.202	0.21	19.656	1.77
SiemensNovation	PD000288	53	Right	MLO	7.1	13.66	60	0.52	0.179	10.526	1.782
GE	PD000289	63	Left	CC	10	24.37	52	0.41	0.341	4.137	1.009
GE	PD000289	63	Right	CC	8	20.32	55	0.394	0.348	7.364	1.206
GE	PD000289	63	Right	MLO	16	15.17	86	1.055	1.004	4.196	1.506
GE	PD000289	63	Left	MLO	15	17.52	81	0.856	0.637	3.146	1.691
SiemensNovation	PD000290	64	Right	CC	12.2	23.09	28	0.528	0.198	5.975	1.009
SiemensNovation	PD000290	64	Left	CC	16.5	16.59	36	0.995	0.47	8.251	1.219
SiemensNovation	PD000290	64	Right	MLO	16.9	21.78	40	0.776	0.258	4.711	1.245
SiemensNovation	PD000290	64	Left	MLO	12.9	10.24	50	1.26	0.764	6.12	1.407
GE	PD000291	57	Left	CC	8	34.61	45	0.231	0.161	16.979	1.009
SiemensNovation	PD000291	56	Left	CC	6.3	30.85	44	0.204	0.148	5.424	1.097
SiemensNovation	PD000291	56	Left	MLO	8.9	19.57	42	0.455	0.198	7.05	1.202
GE	PD000291	57	Left	MLO	13	19.72	47	0.659	0.201	6.213	1.266
GE	PD000292	55	Right	CC	9	40.23	48	0.224	0.172	8.852	1.01
GE	PD000292	55	Left	MLO	13	18.74	58	0.694	0.367	7.791	1.094
GE	PD000292	55	Left	CC	9	37.35	54	0.241	0.21	7.541	1.159
GE	PD000292	55	Right	MLO	11	16.32	56	0.674	0.327	6.58	1.209
Hologic	PD000293	63	Left	CC	17.1	15.25	40	1.121	0.601	5.901	1.01
Hologic	PD000293	63	Right	CC	16.61	15.7	40	1.058	0.571	4.912	1.048
Hologic	PD000293	63	Right	MLO	17.58	12.42	53	1.416	0.848	5.059	1.774
Hologic	PD000293	63	Left	MLO	19.05	12.09	53	1.575	0.82	5.353	2.022
SiemensNovation	PD000294	79	Left	MLO	8.5	15.7	26	0.542	0.152	34.467	1.011
SiemensNovation	PD000294	78	Right	MLO	10.4	17.57	31	0.592	0.198	18.591	1.072
SiemensNovation	PD000294	79	Right	MLO	9.7	30	32	0.323	0.135	16.291	1.104
SiemensNovation	PD000294	79	Right	CC	7.8	23.91	26	0.326	0.121	19.423	1.117
SiemensNovation	PD000294	78	Right	CC	9.9	28.84	31	0.343	0.161	24.282	1.388
SiemensNovation	PD000294	78	Left	MLO	13.8	19.53	28	0.707	0.174	21.032	1.389
SiemensNovation	PD000294	78	Left	CC	10.5	26.49	29	0.396	0.163	16.049	1.445
SiemensNovation	PD000294	79	Left	CC	8.5	20.84	23	0.408	0.122	18.063	1.579
SiemensNovation	PD000294	79	Right	MLO	11.8	20.99	25	0.562	0.146	18.352	1.974
GE	PD000295	60	Right	CC	14	38.83	57	0.361	0.349	15.85	1.011
GE	PD000295	60	Left	CC	7	21.59	55	0.324	0.294	23.896	1.248
GE	PD000295	60	Right	MLO	14	15.46	61	0.906	0.482	9.826	1.324
GE	PD000295	60	Left	MLO	16	18.39	62	0.87	0.509	9.9	1.538
SiemensNovation	PD000296	46	Left	MLO	8.5	11.73	48	0.725	0.402	10.964	1.011
SiemensNovation	PD000296	46	Left	CC	8.4	24.83	46	0.338	0.278	11.853	1.087
SiemensNovation	PD000296	46	Right	MLO	8.5	13.76	47	0.618	0.372	10.817	1.096
SiemensNovation	PD000296	46	Right	CC	8.9	28.45	43	0.313	0.245	9.339	1.337
SiemensNovation	PD000297	50	Right	CC	8	48.81	46	0.164	0.122	17.902	1.013
SiemensNovation	PD000297	50	Left	CC	8.3	42.76	49	0.194	0.161	21.352	1.206
SiemensNovation	PD000297	50	Right	MLO	19.2	39.5	37	0.486	0.126	11.577	1.622
SiemensNovation	PD000297	50	Left	MLO	16.5	32.1	41	0.514	0.226	20.195	1.869
GE	PD000298	59	Left	CC	10	24.38	50	0.41	0.349	6.154	1.014
GE	PD000298	59	Left	MLO	10	15.31	52	0.653	0.412	7.004	1.039
GE	PD000298	59	Right	MLO	10	10.66	59	0.938	0.588	7.483	1.111
GE	PD000298	59	Right	CC	11	23.68	59	0.464	0.505	6.515	1.246
GE	PD000299	71	Right	MLO	14	11.74	42	1.192	0.498	24.622	1.015
GE	PD000299	71	Right	CC	14	14.12	34	0.991	0.411	7.62	1.297
GE	PD000299	70	Right	MLO	13	14.14	43	0.919	0.475	9.422	2.014
GE	PD000299	70	Right	CC	6	6.61	34	0.908	0.381	13.151	2.967
SiemensNovation	PD000300	57	Right	CC	6.4	28.16	56	0.227	0.231	19.904	1.015
SiemensNovation	PD000300	57	Left	CC	7.9	22.04	56	0.358	0.35	15.485	1.319
SiemensNovation	PD000300	57	Left	MLO	14.3	16.17	51	0.884	0.486	7.409	1.716
SiemensNovation	PD000300	57	Right	MLO	12.3	14.04	58	0.876	0.463	4.667	1.742
GE	PD000301	60	Left	CC	8	8.09	52	0.989	0.728	2.6	1.016
GE	PD000301	60	Right	CC	11	10.41	54	1.057	0.807	2.715	1.076
GE	PD000301	60	Left	MLO	14	8.18	67	1.711	1.312	3.401	1.089
GE	PD000301	60	Right	MLO	15	9.49	67	1.58	1.304	4.524	1.129
GE	PD000302	67	Left	CC	9	15.12	50	0.595	0.465	6.496	1.016
SiemensNovation	PD000302	66	Left	CC	6.6	10.11	49	0.653	0.524	3.37	1.066
GE	PD000302	67	Left	MLO	16	13.66	59	1.171	0.79	5.321	1.145
SiemensNovation	PD000302	66	Left	MLO	8.2	7.61	52	1.077	0.663	4.366	1.414
GE	PD000303	56	Left	CC	18	66.28	47	0.272	0.222	9.396	1.016
GE	PD000303	56	Left	MLO	17	22.2	53	0.766	0.338	6.114	1.019
GE	PD000303	56	Right	CC	12	41.14	51	0.292	0.254	7.143	1.033
GE	PD000303	56	Right	MLO	17	22.66	54	0.75	0.309	7.502	1.051
SiemensNovation	PD000304	46	Left	MLO	7.2	12.31	48	0.585	0.36	10.308	1.016
SiemensNovation	PD000304	46	Right	MLO	8.6	15.04	43	0.572	0.279	13.929	1.289
SiemensNovation	PD000304	46	Right	CC	8.8	31.87	39	0.276	0.198	21.336	1.365
SiemensNovation	PD000304	46	Left	CC	8.5	25.99	42	0.327	0.248	10.724	1.475
SiemensNovation	PD000305	66	Left	MLO	16	12.64	35	1.266	0.403	5.447	1.017
SiemensNovation	PD000305	66	Left	CC	13.5	16.86	32	0.801	0.336	5.118	1.017
SiemensNovation	PD000305	66	Right	CC	14.5	15.97	34	0.908	0.403	4.222	1.023
SiemensNovation	PD000305	66	Right	MLO	13.8	10.78	39	1.28	0.506	5.877	1.241
GE	PD000306	55	Right	MLO	12	14.32	69	0.838	0.37	8.69	1.017
GE	PD000306	55	Left	CC	7	20.81	55	0.336	0.302	4.564	1.061
GE	PD000306	55	Left	MLO	13	15.02	70	0.866	0.608	8.819	1.132
GE	PD000306	55	Right	CC	6	16.61	61	0.361	0.389	4.212	1.177
SiemensNovation	PD000307	62	Right	CC	10.5	27.63	46	0.38	0.319	20.111	1.018
SiemensNovation	PD000307	62	Left	MLO	9.3	31.06	52	0.299	0.268	7.295	1.063
SiemensNovation	PD000307	62	Left	CC	8.7	17.45	44	0.499	0.363	5.935	1.113
SiemensNovation	PD000307	62	Left	MLO	10.1	11.45	52	0.882	0.626	6.666	1.394
SiemensNovation	PD000307	62	Right	MLO	15.6	15.32	41	1.018	0.47	10.03	1.501
GE	PD000308	62	Left	MLO	11	11.17	50	0.985	0.467	6.346	1.018
GE	PD000308	62	Right	MLO	15	16.45	49	0.912	0.449	5.484	1.088
GE	PD000308	62	Right	CC	7	19.01	52	0.368	0.317	5.475	1.148
GE	PD000308	62	Left	CC	6	15.46	56	0.388	0.367	5.941	1.264
Hologic	PD000309	59	Right	CC	16.07	65.85	36	0.244	0.158	24.251	1.018
Hologic	PD000309	59	Right	CC	16.07	65.85	36	0.244	0.158	24.251	1.018
Hologic	PD000309	59	Left	CC	13.51	47.46	37	0.285	0.189	7.741	1.147
Hologic	PD000309	59	Left	CC	13.51	47.46	37	0.285	0.189	7.741	1.147
HologicTomo	PD000309	59	Right	CC	16.07	65.34	36	0.246	0.157	11.667	1.371
HologicTomo	PD000309	59	Left	CC	13.51	48.37	37	0.279	0.188	9.498	1.406
Hologic	PD000309	59	Left	MLO	17.27	21.15	46	0.817	0.229	9.48	1.594
Hologic	PD000309	59	Left	MLO	17.27	21.15	46	0.817	0.229	9.48	1.594
HologicTomo	PD000309	59	Left	MLO	17.27	20.95	46	0.824	0.224	7.869	1.743
HologicTomo	PD000309	59	Right	MLO	18.03	22.77	51	0.792	0.388	8.022	1.902
Hologic	PD000309	59	Right	MLO	18.03	23.1	51	0.78	0.382	9.281	1.966
Hologic	PD000309	59	Right	MLO	18.03	23.1	51	0.78	0.382	9.281	1.966
Hologic	PD000310	55	Left	CC	14.43	39.88	38	0.362	0.234	7.597	1.019
Hologic	PD000310	55	Right	CC	14.38	35.63	43	0.404	0.306	5.996	1.157
Hologic	PD000310	55	Left	MLO	15.34	17.92	45	0.856	0.277	5.602	1.36
HologicTomo	PD000310	55	Left	CC	14.43	39.74	38	0.363	0.235	6.207	1.403
HologicTomo	PD000310	55	Right	CC	14.38	35.7	43	0.403	0.305	5.704	1.59
HologicTomo	PD000310	55	Left	MLO	15.34	17.88	45	0.858	0.28	4.435	1.631
Hologic	PD000310	55	Right	MLO	17.05	15.54	56	1.097	0.55	6.226	2.016
HologicTomo	PD000310	55	Right	MLO	17.05	15.7	56	1.086	0.513	6.342	2.192
SiemensNovation	PD000311	62	Right	MLO	10.5	20.14	50	0.521	0.219	5.332	1.02
SiemensNovation	PD000311	62	Right	CC	9.9	47.63	35	0.208	0.138	14.593	1.101
SiemensNovation	PD000311	62	Left	CC	10.9	68.19	43	0.16	0.153	4.348	1.112
SiemensNovation	PD000311	62	Left	CC	11.2	47.42	40	0.236	0.173	6.789	1.205
SiemensNovation	PD000311	62	Left	MLO	12.5	20.7	47	0.604	0.23	3.469	1.532
GE	PD000311	61	Right	CC	6	26.24	40	0.229	0.149	6.129	2.097
GE	PD000311	61	Left	MLO	12	17.38	48	0.691	0.276	3.001	2.494
GE	PD000311	61	Left	CC	3	12.26	46	0.245	0.196	6.544	2.614
GE	PD000311	61	Right	MLO	14	19.91	54	0.703	0.301	4.232	3.009
GE	PD000312	58	Right	CC	15	29.39	52	0.51	0.454	6.575	1.021
GE	PD000312	58	Left	CC	11	19.96	49	0.551	0.431	4.526	1.076
GE	PD000312	58	Right	MLO	13	11.75	57	1.107	0.624	5.959	1.094
GE	PD000312	58	Left	MLO	14	11.93	57	1.173	0.576	5.428	1.127
Hologic	PD000313	56	Left	MLO	4.5	10.83	37	0.416	0.18	27.043	1.021
Hologic	PD000313	56	Right	CC	4.55	31.22	34	0.146	0.099	27.154	1.299
Hologic	PD000313	56	Right	MLO	6.47	14	35	0.462	0.161	28.138	1.302
Hologic	PD000313	56	Left	CC	8.61	50.31	42	0.171	0.119	24.169	1.376
Hologic	PD000314	63	Left	MLO	16.03	10	43	1.603	0.73	5.001	1.021
Hologic	PD000314	63	Right	CC	12.08	11.72	41	1.031	0.578	6.337	1.176
Hologic	PD000314	63	Right	MLO	14.88	8.7	46	1.71	0.764	5.275	1.235
Hologic	PD000314	63	Left	CC	13.5	12.36	41	1.092	0.607	5.254	1.242
HologicTomo	PD000314	63	Left	MLO	16.03	9.93	43	1.614	0.755	4.817	1.621
HologicTomo	PD000314	63	Left	CC	13.5	12.44	41	1.086	0.605	7.507	1.629
HologicTomo	PD000314	63	Right	CC	12.08	11.8	41	1.024	0.576	7.438	1.635
HologicTomo	PD000314	63	Right	MLO	14.88	8.76	46	1.698	0.771	4.833	1.802
GE	PD000315	59	Left	CC	7	23.9	44	0.293	0.212	22.693	1.021
GE	PD000315	59	Right	CC	11	41.67	47	0.264	0.211	23.325	1.089
GE	PD000315	59	Right	MLO	9	14.03	42	0.641	0.318	14.675	1.182
GE	PD000315	59	Left	MLO	10	13.08	51	0.764	0.353	12.374	1.256
GE	PD000316	61	Left	CC	5	6.41	51	0.78	0.592	5.174	1.021
GE	PD000316	61	Right	CC	9	10.94	52	0.823	0.635	5.765	1.027
GE	PD000316	61	Right	MLO	11	8.53	63	1.289	0.951	3.018	1.186
GE	PD000316	61	Left	MLO	17	13.92	70	1.221	0.979	4.064	1.193
GE	PD000317	72	Right	CC	10	24.7	44	0.405	0.29	13.675	1.021
GE	PD000317	72	Left	CC	10	28.13	45	0.356	0.274	18.574	1.148
GE	PD000317	72	Left	MLO	13	16.15	51	0.805	0.426	10.686	1.324
GE	PD000317	72	Right	MLO	10	10.34	57	0.967	0.512	11.711	1.376
SiemensNovation	PD000318	76	Right	CC	12.3	10.16	35	1.211	0.533	4.716	1.022
SiemensNovation	PD000318	76	Left	MLO	13.3	8.64	41	1.54	0.667	5.561	1.245
SiemensNovation	PD000318	76	Left	CC	10.6	9	39	1.178	0.602	5.072	1.248
SiemensNovation	PD000318	76	Right	MLO	13.4	9.34	46	1.434	0.684	5.97	1.513
GE	PD000318	75	Left	CC	13	11.52	48	1.128	0.722	3.778	2.186
GE	PD000318	75	Right	CC	13	12.13	46	1.072	0.652	3.907	2.329
GE	PD000318	75	Left	MLO	15	11.37	54	1.32	0.869	3.982	2.76
GE	PD000318	75	Right	MLO	13	9.54	62	1.363	0.867	3.044	2.822
GE	PD000319	47	Left	MLO	13	20.67	67	0.629	0.53	4.232	1.023
GE	PD000319	47	Left	CC	10	28.63	47	0.349	0.265	5.603	1.042
GE	PD000319	47	Right	CC	14	23.13	67	0.605	0.706	5.588	1.267
GE	PD000319	47	Right	MLO	18	14.7	83	1.225	1.032	6.087	1.313
SiemensNovation	PD000320	48	Right	MLO	8.4	32.84	30	0.256	0.094	26.809	1.024
SiemensNovation	PD000320	48	Right	CC	6.9	42.31	54	0.163	0.182	8.238	1.973
SiemensNovation	PD000320	48	Right	MLO	12.1	26.55	39	0.456	0.195	17.09	2.225
SiemensNovation	PD000320	48	Right	CC	11.9	85.91	30	0.139	0.082	27.819	2.244
GE	PD000321	65	Left	MLO	14	16.12	41	0.868	0.277	12.423	1.025
GE	PD000321	65	Left	CC	11	28.81	38	0.382	0.224	15.35	1.166
GE	PD000322	55	Left	CC	13	36.34	56	0.358	0.358	9.079	1.026
GE	PD000322	55	Right	MLO	16	17.42	69	0.918	0.605	9.188	1.244
GE	PD000322	55	Right	CC	14	31.82	55	0.44	0.435	8.923	1.433
GE	PD000322	55	Left	MLO	16	19.1	60	0.838	0.483	8.309	1.466
SiemensNovation	PD000323	62	Right	MLO	8.9	14.55	48	0.612	0.429	8.677	1.027
SiemensNovation	PD000323	62	Right	CC	9.6	30.76	44	0.312	0.248	10.004	1.065
SiemensNovation	PD000323	62	Left	CC	6.9	22.21	46	0.311	0.26	7.115	1.105
SiemensNovation	PD000323	62	Right	CC	15.6	90.21	44	0.173	0.184	17.212	1.258
SiemensNovation	PD000323	62	Left	MLO	9.9	13.33	43	0.742	0.379	7.351	1.356
GE	PD000324	66	Right	CC	15	22.8	44	0.658	0.415	7.9	1.027
GE	PD000324	66	Left	CC	15	20.5	48	0.732	0.509	6.933	1.066
GE	PD000324	66	Left	MLO	15	14.84	60	1.011	0.643	4.967	1.147
GE	PD000324	66	Right	MLO	16	15.18	65	1.054	0.686	7.569	1.382
GE	PD000325	61	Right	MLO	14	10.97	58	1.277	0.868	9.667	1.028
GE	PD000325	61	Left	MLO	15	14.92	54	1.005	0.653	8.891	1.136
GE	PD000325	61	Right	CC	12	14.15	55	0.848	0.724	7.619	1.143
GE	PD000325	61	Left	CC	11	15.47	51	0.711	0.551	8.522	1.237
GE	PD000326	79	Left	CC	17	33.41	42	0.509	0.32	9.515	1.028
GE	PD000326	79	Left	MLO	17	17.21	46	0.988	0.467	7.266	1.276
GE	PD000327	55	Right	CC	11	40.26	56	0.273	0.271	6.896	1.028
GE	PD000327	55	Right	CC	6	20.43	57	0.294	0.291	7.093	1.104
GE	PD000327	55	Left	MLO	10	12.97	67	0.771	0.594	9.175	1.161
GE	PD000327	55	Left	CC	9	24.7	68	0.364	0.43	6.693	1.274
GE	PD000327	55	Right	MLO	12	12.76	71	0.941	0.577	9.72	1.426
GE	PD000328	62	Right	CC	10	24.29	56	0.412	0.419	6.087	1.028
GE	PD000328	62	Right	CC	4	8.55	58	0.468	0.5	5.375	1.261
GE	PD000328	62	Right	MLO	13	16.52	55	0.787	0.526	5.866	1.266
GE	PD000329	45	Left	CC	11	31.72	38	0.347	0.212	21.24	1.029
GE	PD000329	45	Left	MLO	15	16.74	42	0.896	0.287	16.845	1.153
GE	PD000329	45	Right	MLO	16	18.82	47	0.85	0.284	19.299	1.244
GE	PD000329	45	Right	CC	9	25.04	44	0.359	0.272	26.96	1.298
SiemensNovation	PD000329	44	Left	CC	7.1	25.04	40	0.284	0.207	20.546	1.376
SiemensNovation	PD000329	44	Left	MLO	10.6	15.42	40	0.687	0.289	19.533	1.384
SiemensNovation	PD000329	44	Right	CC	10.1	29.59	37	0.341	0.213	25.839	1.57
SiemensNovation	PD000329	44	Right	MLO	16	22.6	34	0.708	0.223	24.938	2.067
GE	PD000330	71	Left	CC	11	27.09	43	0.406	0.286	16.324	1.03
GE	PD000330	71	Right	MLO	14	14.07	48	0.995	0.439	10.391	1.111
GE	PD000330	71	Right	CC	14	33.91	46	0.413	0.317	14.977	1.249
GE	PD000330	71	Left	MLO	11	11	51	1	0.446	10.618	1.254
GE	PD000331	55	Right	CC	13	13.15	52	0.988	0.73	7.401	1.031
GE	PD000331	55	Right	MLO	15	10.58	62	1.418	0.899	5.973	1.231
GE	PD000331	54	Right	CC	8	6.83	45	1.172	0.689	11.597	2.702
GE	PD000331	54	Right	MLO	10	6.15	48	1.627	0.78	10.289	2.984
GE	PD000332	52	Left	MLO	15	6.68	43	2.246	0.901	11.544	1.032
GE	PD000332	52	Left	CC	16	8.58	40	1.865	0.87	6.158	1.116
GE	PD000332	52	Right	MLO	16	6.17	44	2.594	1.05	4.241	1.205
GE	PD000332	52	Right	CC	15	6.86	35	2.187	0.854	5.889	1.327
GE	PD000332	51	Right	CC	14	5.83	37	2.403	0.988	5.617	2.212
GE	PD000332	51	Right	MLO	16	5.96	48	2.685	1.097	5.6	2.755
GE	PD000332	51	Left	MLO	14	5.99	49	2.336	0.986	7.654	2.813
GE	PD000332	51	Left	CC	12	5.95	42	2.018	0.987	4.723	3.096
SiemensNovation	PD000333	60	Right	MLO	9.8	16.85	48	0.582	0.373	6.541	1.033
SiemensNovation	PD000333	60	Right	CC	9	37.43	43	0.24	0.172	4.59	1.105
GE	PD000334	61	Left	MLO	16	18.64	57	0.858	0.478	5.654	1.033
GE	PD000334	61	Right	CC	10	32.56	45	0.307	0.221	15.584	1.062
GE	PD000334	61	Right	MLO	14	15.87	58	0.882	0.43	5.281	1.092
GE	PD000334	61	Left	CC	9	24.86	54	0.362	0.345	5.852	1.285
GE	PD000335	67	Right	CC	18	8.82	48	2.041	1.205	2.783	1.033
GE	PD000335	67	Left	CC	15	7.47	47	2.007	1.144	2.623	1.171
GE	PD000335	67	Left	MLO	17	8	57	2.124	1.338	2.599	1.183
GE	PD000335	67	Right	MLO	16	7.38	65	2.168	1.504	2.53	1.668
GE	PD000336	62	Left	MLO	16	19.44	48	0.823	0.317	8.253	1.034
GE	PD000336	62	Left	CC	12	37.5	48	0.32	0.27	6.932	1.065
GE	PD000336	62	Right	MLO	18	22.02	51	0.817	0.328	8.717	1.105
GE	PD000336	62	Right	CC	15	53.2	48	0.282	0.218	14.581	1.116
GE	PD000337	57	Right	CC	5	28.86	45	0.173	0.118	18.252	1.034
GE	PD000337	57	Left	MLO	14	17.22	71	0.813	0.542	10.568	1.142
GE	PD000337	57	Left	CC	7	26.67	56	0.262	0.238	10.46	1.148
GE	PD000337	57	Right	MLO	8	14.32	66	0.559	0.26	8.142	1.371
GE	PD000338	58	Right	CC	4	14.64	57	0.273	0.266	25.743	1.034
GE	PD000338	58	Left	MLO	12	15.28	56	0.785	0.563	14.955	1.198
GE	PD000338	58	Left	CC	8	23.19	55	0.345	0.317	24.454	1.29
GE	PD000338	58	Left	MLO	14	17.26	57	0.811	0.565	14.574	1.296
GE	PD000338	58	Right	MLO	6	7.76	53	0.773	0.518	17.941	1.394
GE	PD000339	61	Right	MLO	14	14.9	53	0.94	0.476	4.797	1.034
GE	PD000339	61	Right	CC	4	8.72	50	0.459	0.391	5.645	1.038
GE	PD000339	61	Left	CC	6	9.41	49	0.637	0.481	8.873	1.042
GE	PD000339	61	Left	MLO	12	11.54	53	1.04	0.578	5.709	1.057
SiemensNovation	PD000340	56	Left	MLO	9	13.44	51	0.67	0.355	6.286	1.035
SiemensNovation	PD000340	56	Right	CC	8.6	20.52	49	0.419	0.361	3.865	1.061
SiemensNovation	PD000340	56	Left	CC	9	24.3	44	0.37	0.284	5.341	1.104
SiemensNovation	PD000340	56	Right	MLO	9.4	11.87	57	0.792	0.584	5.533	1.46
GE	PD000341	56	Right	CC	9	16.3	57	0.552	0.539	3.812	1.035
GE	PD000341	56	Left	CC	11	21.2	60	0.519	0.563	3.67	1.128
GE	PD000341	56	Left	MLO	10	9.24	66	1.083	0.739	5.4	1.246
GE	PD000341	56	Right	MLO	13	11.77	72	1.105	0.7	8.319	1.299
Hologic	PD000342	75	Right	CC	7.16	4.68	48	1.531	0.997	3.667	1.036
Hologic	PD000342	75	Right	CC	7.16	4.68	48	1.531	0.997	3.667	1.036
Hologic	PD000342	75	Right	MLO	16.44	9.01	48	1.825	0.996	4.127	1.156
Hologic	PD000342	75	Right	MLO	16.44	9.01	48	1.825	0.996	4.127	1.156
HologicTomo	PD000342	75	Right	CC	7.16	4.68	48	1.529	0.996	6.063	1.803
HologicTomo	PD000342	75	Right	MLO	16.44	9	48	1.827	1.001	3.582	1.822
Hologic	PD000343	58	Left	CC	13.3	22.96	38	0.579	0.33	8.109	1.036
HologicTomo	PD000343	58	Left	CC	13.3	22.93	38	0.58	0.329	6.664	1.407
Hologic	PD000343	58	Left	MLO	15.67	12.41	44	1.263	0.443	4.911	1.497
HologicTomo	PD000343	58	Left	MLO	15.67	12.41	44	1.263	0.443	4.163	1.678
GE	PD000344	61	Left	CC	9	21.28	46	0.423	0.324	16.003	1.037
GE	PD000344	61	Left	MLO	12	12.53	52	0.958	0.463	13.502	1.153
GE	PD000344	61	Right	CC	10	27.55	47	0.363	0.299	20.191	1.237
GE	PD000344	61	Right	MLO	10	11.12	56	0.899	0.547	15.225	1.318
GE	PD000344	59	Left	CC	6	14.82	44	0.405	0.298	17.91	1.556
GE	PD000344	59	Right	CC	8	23.07	46	0.347	0.28	18.984	1.561
GE	PD000344	59	Left	MLO	13	12.73	59	1.021	0.591	10.824	1.674
GE	PD000344	59	Right	MLO	9	10.47	56	0.859	0.532	12.092	1.732
GE	PD000345	58	Left	MLO	17	22.49	51	0.756	0.447	7.278	1.037
GE	PD000345	58	Left	CC	8	19.46	49	0.411	0.344	6.94	1.038
GE	PD000345	58	Right	CC	7	19.07	55	0.367	0.335	5.64	1.116
GE	PD000345	58	Right	MLO	11	12.38	60	0.889	0.441	3.424	1.148
GE	PD000346	43	Left	MLO	13	23.62	50	0.55	0.331	25.914	1.037
GE	PD000346	43	Left	CC	12	31.69	53	0.379	0.341	21.061	1.19
GE	PD000346	41	Left	MLO	13	13.24	67	0.982	0.641	19.361	1.829
GE	PD000346	41	Left	CC	9	20.33	60	0.443	0.46	22.186	1.908
GE	PD000346	41	Left	MLO	12	11.99	64	1.001	0.62	19.63	2.015
GE	PD000347	68	Left	CC	15	17.7	56	0.847	0.722	5.647	1.04
GE	PD000347	68	Left	MLO	15	11.6	62	1.293	0.726	3.529	1.201
SiemensNovation	PD000348	43	Left	CC	8.5	23.01	49	0.369	0.333	7.264	1.04
SiemensNovation	PD000348	43	Right	CC	9	26.8	50	0.336	0.301	5.918	1.046
SiemensNovation	PD000348	43	Left	MLO	9.2	12.9	47	0.713	0.367	6.487	1.132
SiemensNovation	PD000348	43	Right	MLO	8.7	13.19	53	0.66	0.399	7.669	1.374
SiemensNovation	PD000349	72	Left	CC	7.2	18.49	50	0.389	0.345	6.139	1.041
SiemensNovation	PD000349	72	Right	CC	9.1	27.43	47	0.332	0.285	6.999	1.112
SiemensNovation	PD000349	72	Right	MLO	8.6	11.58	47	0.743	0.435	6.824	1.124
SiemensNovation	PD000349	72	Left	MLO	9.6	11.22	44	0.855	0.477	6.889	1.37
GE	PD000350	64	Left	CC	6	19.55	45	0.307	0.248	15.886	1.041
SiemensNovation	PD000350	63	Left	MLO	9.9	13.39	47	0.739	0.365	6.256	1.49
GE	PD000350	64	Left	MLO	14	14.3	62	0.979	0.471	6.658	1.532
SiemensNovation	PD000350	63	Left	CC	10.6	30.6	41	0.346	0.253	5.167	1.542
Hologic	PD000351	50	Right	CC	16.56	35.03	28	0.473	0.182	14.62	1.042
Hologic	PD000351	50	Left	CC	13.53	32.24	34	0.42	0.219	13.608	1.245
Hologic	PD000351	50	Left	MLO	17.64	17.92	41	0.985	0.283	11.377	1.542
Hologic	PD000351	50	Right	MLO	18.06	19.41	40	0.93	0.227	8.881	1.674
GE	PD000352	57	Right	MLO	15	13.57	66	1.106	0.752	6.009	1.042
GE	PD000352	57	Right	CC	15	19.03	60	0.788	0.765	3.134	1.104
GE	PD000352	57	Left	MLO	13	11.17	64	1.164	0.871	4.664	1.234
GE	PD000352	57	Left	CC	14	17.72	60	0.79	0.764	5.523	1.263
GE	PD000353	36	Left	CC	4	14.33	60	0.279	0.262	9.346	1.042
GE	PD000353	36	Left	MLO	6	11.29	53	0.531	0.282	10.17	1.058
GE	PD000353	36	Right	CC	7	23.61	44	0.297	0.21	31.422	1.176
GE	PD000353	36	Right	MLO	11	15.79	49	0.697	0.315	25.56	1.368
GE	PD000354	63	Left	CC	14	25.76	37	0.543	0.279	10.573	1.042
GE	PD000354	63	Left	MLO	16	14.42	46	1.11	0.455	9.809	1.158
GE	PD000355	60	Left	CC	10	18.43	43	0.543	0.346	12	1.043
GE	PD000355	60	Right	CC	10	17.69	43	0.565	0.358	10.091	1.076
GE	PD000355	60	Right	MLO	9	8.72	52	1.032	0.536	9.634	1.106
GE	PD000355	60	Left	MLO	8	7.91	47	1.011	0.546	14.04	1.203
GE	PD000356	49	Left	CC	12	45.17	30	0.266	0.121	20.543	1.043
GE	PD000356	49	Left	MLO	14	24.85	33	0.563	0.178	27.312	1.084
GE	PD000356	49	Right	CC	15	66.59	32	0.225	0.12	21.553	1.127
GE	PD000356	49	Right	MLO	15	24.07	35	0.623	0.193	17.289	1.31
GE	PD000357	44	Right	CC	14	71.02	48	0.197	0.169	24.044	1.043
GE	PD000357	44	Left	CC	13	38.01	54	0.342	0.308	13.673	1.283
GE	PD000357	44	Right	MLO	10	18.53	57	0.54	0.489	13.407	1.353
GE	PD000357	44	Left	MLO	14	17.44	55	0.803	0.435	12.609	1.588
SiemensNovation	PD000358	59	Left	CC	5.5	19.55	52	0.281	0.262	5.57	1.043
GE	PD000358	60	Right	CC	7	21.48	53	0.326	0.284	7.281	1.145
GE	PD000358	60	Left	CC	5	18.06	47	0.277	0.214	14.531	1.205
GE	PD000358	60	Left	MLO	8	9.93	61	0.805	0.407	4.934	1.279
GE	PD000358	60	Right	MLO	9	10.91	62	0.825	0.379	6.222	1.291
SiemensNovation	PD000358	59	Right	MLO	7.1	11.18	62	0.635	0.44	6.827	1.432
SiemensNovation	PD000358	59	Right	CC	6.7	18.15	58	0.369	0.381	5.174	1.456
SiemensNovation	PD000358	59	Left	MLO	6.8	10.11	62	0.672	0.424	4.127	1.469
SiemensNovation	PD000359	63	Left	CC	7.7	26.65	48	0.289	0.272	5.195	1.043
SiemensNovation	PD000359	63	Right	MLO	7.9	14.37	52	0.55	0.346	8.868	1.354
SiemensNovation	PD000359	63	Right	CC	5.7	21.04	52	0.271	0.266	5.132	1.389
SiemensNovation	PD000359	63	Left	CC	6.2	54.54	54	0.114	0.198	5.255	1.416
SiemensNovation	PD000359	63	Left	MLO	9.3	15.73	56	0.591	0.391	10.678	1.659
GE	PD000360	54	Left	MLO	13	11.71	57	1.111	0.618	8.105	1.044
GE	PD000360	54	Left	CC	16	28.08	48	0.57	0.427	12.84	1.16
GE	PD000360	54	Right	CC	18	30.66	48	0.587	0.433	14.045	1.317
GE	PD000360	54	Right	MLO	16	13.83	50	1.157	0.589	13.893	1.46
GE	PD000360	54	Right	MLO	16	14.14	51	1.132	0.581	13.371	1.47
GE	PD000361	69	Right	CC	15	18.07	43	0.83	0.483	7.983	1.044
GE	PD000361	69	Right	MLO	17	15.02	57	1.132	0.705	5.171	1.264
SiemensNovation	PD000362	63	Right	CC	7.7	16.91	49	0.455	0.4	6.401	1.044
SiemensNovation	PD000362	63	Right	MLO	8.1	10.46	49	0.774	0.427	7.637	1.376
GE	PD000362	61	Right	MLO	14	14.48	67	0.967	0.575	6.366	1.693
SiemensNovation	PD000362	63	Left	MLO	9.2	9.25	52	0.994	0.57	10.048	1.698
SiemensNovation	PD000362	63	Left	CC	8.3	14.5	54	0.572	0.548	8.278	1.725
GE	PD000362	61	Left	CC	4	7.39	64	0.541	0.641	6.547	2.07
GE	PD000362	61	Right	CC	6	13.38	61	0.448	0.491	5.436	2.081
GE	PD000362	61	Left	MLO	13	11.47	72	1.133	0.675	9.912	2.253
GE	PD000363	65	Right	MLO	14	6.94	56	2.018	1.207	3.223	1.045
GE	PD000363	65	Right	CC	9	5.86	53	1.536	1.074	3.314	1.07
SiemensNovation	PD000364	64	Left	MLO	8.2	9.83	51	0.834	0.466	5.159	1.045
SiemensNovation	PD000364	64	Right	MLO	11.9	10.44	48	1.14	0.491	4.99	1.052
SiemensNovation	PD000364	64	Right	CC	7.5	14	50	0.536	0.461	4.208	1.06
SiemensNovation	PD000364	64	Left	CC	8.1	15.57	48	0.52	0.428	3.865	1.063
GE	PD000365	54	Right	MLO	14	9.24	51	1.516	0.553	3.837	1.045
GE	PD000365	54	Right	CC	8	13.36	47	0.599	0.426	6.205	1.117
GE	PD000365	54	Left	CC	12	15.94	45	0.753	0.477	5.991	1.18
GE	PD000365	54	Left	MLO	13	9.13	51	1.424	0.67	5.855	1.273
GE	PD000366	59	Left	MLO	14	14.56	51	0.961	0.507	11.305	1.046
GE	PD000366	59	Right	CC	7	18.71	52	0.374	0.349	13.828	1.163
GE	PD000366	59	Left	CC	6	16.68	50	0.36	0.292	18.717	1.176
GE	PD000366	59	Right	MLO	8	9.33	48	0.858	0.439	11.922	1.2
GE	PD000366	59	Left	MLO	16	17.37	53	0.921	0.528	10.214	1.332
GE	PD000366	59	Right	CC	7	17.43	58	0.402	0.39	9.907	1.447
GE	PD000367	54	Right	CC	15	27.3	49	0.549	0.426	12.131	1.046
GE	PD000367	54	Right	MLO	17	19.96	59	0.852	0.562	9.501	1.165
GE	PD000368	54	Right	CC	17	43.39	61	0.392	0.439	12.088	1.046
GE	PD000368	54	Left	CC	12	27	57	0.444	0.439	6.485	1.137
GE	PD000368	54	Right	CC	12	27.1	58	0.443	0.436	6.518	1.148
GE	PD000368	54	Left	MLO	11	10.45	70	1.053	0.743	6.666	1.331
GE	PD000368	54	Right	MLO	12	11.95	72	1.004	0.683	9.494	1.339
SiemensNovation	PD000369	71	Right	MLO	8.5	12.56	48	0.677	0.366	5.8	1.047
SiemensNovation	PD000369	71	Left	MLO	8.6	13.75	50	0.625	0.396	7.06	1.385
SiemensNovation	PD000369	71	Right	CC	9.5	26.51	52	0.358	0.36	4.235	1.407
SiemensNovation	PD000369	71	Left	CC	8.9	23.72	54	0.375	0.376	4.597	1.756
GE	PD000370	54	Left	CC	9	26.84	50	0.335	0.286	12.594	1.047
GE	PD000370	54	Right	CC	8	26.92	48	0.297	0.241	17.449	1.065
GE	PD000370	54	Right	MLO	10	12.42	57	0.805	0.477	6.155	1.144
GE	PD000370	54	Left	MLO	10	12.06	59	0.829	0.36	6.313	1.152
GE	PD000371	58	Left	CC	12	17.45	41	0.688	0.396	9.518	1.047
GE	PD000371	58	Left	MLO	13	10.8	49	1.204	0.571	8.862	1.23
SiemensNovation	PD000372	50	Left	CC	8.5	13.85	50	0.614	0.505	5.903	1.048
SiemensNovation	PD000372	50	Right	CC	9.9	13.91	47	0.712	0.517	5.076	1.143
SiemensNovation	PD000372	50	Left	MLO	14.7	10.02	49	1.467	0.73	5.047	1.409
SiemensNovation	PD000372	50	Right	MLO	17.5	12.51	47	1.399	0.705	4.752	1.532
SiemensNovation	PD000373	50	Right	CC	10.6	32.49	48	0.326	0.284	5.097	1.048
SiemensNovation	PD000373	50	Right	MLO	10.7	14.59	56	0.733	0.438	6.027	1.443
SiemensNovation	PD000374	53	Left	MLO	20.3	58.33	48	0.348	0.184	6.793	1.049
SiemensNovation	PD000374	53	Right	CC	9.5	24.73	50	0.384	0.35	3.466	1.548
SiemensNovation	PD000374	53	Left	CC	14.5	27.02	45	0.537	0.393	4.426	1.942
SiemensNovation	PD000374	53	Left	MLO	18	16.63	49	1.083	0.575	4.083	2.06
SiemensNovation	PD000374	53	Right	MLO	18.7	21.37	47	0.875	0.495	5.784	2.244
GE	PD000375	64	Right	CC	8	11.86	45	0.674	0.438	17.499	1.05
GE	PD000375	64	Right	MLO	8	8.18	49	0.977	0.52	19.059	1.152
GE	PD000375	64	Left	MLO	8	9.29	47	0.861	0.463	19.444	1.262
GE	PD000375	64	Left	CC	7	12.69	46	0.552	0.388	18.09	1.341
SiemensNovation	PD000376	52	Left	MLO	9.4	9.03	50	1.041	0.618	5.801	1.05
SiemensNovation	PD000376	52	Left	CC	9.1	20.81	50	0.437	0.399	5.216	1.393
SiemensNovation	PD000376	52	Right	CC	8.1	15.54	56	0.521	0.544	7.393	1.426
SiemensNovation	PD000376	52	Right	MLO	9.1	7.53	55	1.209	0.783	8.238	1.722
SiemensNovation	PD000377	49	Right	CC	7.9	47.93	37	0.165	0.136	24.291	1.05
SiemensNovation	PD000377	49	Left	MLO	12.3	19.59	37	0.628	0.22	13.597	1.143
SiemensNovation	PD000377	49	Left	CC	11.1	42.08	33	0.264	0.154	10.496	1.512
SiemensNovation	PD000377	49	Right	MLO	12.6	22.37	35	0.563	0.163	18.343	1.738
GE	PD000378	59	Right	CC	16	13.69	51	1.168	0.805	5.702	1.051
GE	PD000378	59	Left	CC	16	13.35	51	1.198	0.822	6.358	1.196
GE	PD000378	59	Right	MLO	16	8.9	72	1.798	1.38	3.745	1.324
GE	PD000378	59	Left	MLO	16	9.54	77	1.678	1.482	3.531	1.348
GE	PD000378	58	Left	MLO	17	10.02	66	1.697	1.301	3.056	2.579
GE	PD000378	58	Right	MLO	15	9.06	67	1.655	1.349	4.131	2.818
GE	PD000378	58	Right	CC	13	12.03	53	1.081	0.801	5.229	3.15
GE	PD000378	58	Left	CC	16	13.49	54	1.186	0.884	7.094	3.21
GE	PD000379	57	Right	CC	12	32.5	48	0.369	0.311	17.683	1.051
GE	PD000379	57	Left	MLO	14	20.72	48	0.676	0.496	16.275	1.107
GE	PD000379	57	Right	MLO	13	14.94	56	0.87	0.426	13.102	1.125
GE	PD000379	57	Left	MLO	15	16.21	60	0.925	0.485	13.548	1.17
GE	PD000379	57	Left	CC	11	27.75	55	0.396	0.395	11.143	1.323
SiemensNovation	PD000380	50	Right	CC	11.6	28.22	48	0.411	0.344	4.842	1.051
SiemensNovation	PD000380	50	Right	MLO	10.9	13.87	57	0.786	0.552	5.682	1.458
SiemensNovation	PD000380	51	Right	CC	15.7	27.62	44	0.568	0.4	5.067	1.934
SiemensNovation	PD000380	51	Right	MLO	17.5	14.51	51	1.206	0.634	5.723	2.083
GE	PD000381	72	Right	CC	13	28.17	40	0.462	0.277	8.41	1.052
GE	PD000381	72	Right	MLO	12	19.67	48	0.61	0.459	11.761	1.142
GE	PD000381	71	Right	CC	16	38.38	38	0.417	0.239	18.411	2.009
GE	PD000381	71	Left	CC	11	44.37	58	0.248	0.247	17.872	3.7
Hologic	PD000382	69	Right	CC	11.01	28.37	45	0.388	0.313	5.666	1.052
Hologic	PD000382	69	Right	CC	11.01	28.37	45	0.388	0.313	5.666	1.052
Hologic	PD000382	69	Right	MLO	14.64	14.67	41	0.998	0.421	5.407	1.057
Hologic	PD000382	69	Right	MLO	14.64	14.67	41	0.998	0.421	5.407	1.057
Hologic	PD000382	69	Left	CC	11.71	24.49	42	0.478	0.333	5.716	1.18
Hologic	PD000382	69	Left	CC	11.71	24.49	42	0.478	0.333	5.716	1.18
Hologic	PD000382	69	Left	MLO	9.19	10.45	50	0.88	0.426	4.029	1.343
Hologic	PD000382	69	Left	MLO	9.19	10.45	50	0.88	0.426	4.029	1.343
HologicTomo	PD000382	69	Right	MLO	14.64	14.7	41	0.996	0.42	4.545	1.64
HologicTomo	PD000382	69	Right	CC	11.01	28.68	45	0.384	0.311	4.652	1.65
HologicTomo	PD000382	69	Left	CC	11.71	24.73	42	0.474	0.331	5.422	1.703
HologicTomo	PD000382	69	Left	MLO	9.19	10.44	50	0.881	0.425	3.58	1.892
SiemensNovation	PD000383	59	Left	CC	9	7.97	49	1.129	0.795	5.611	1.052
SiemensNovation	PD000383	59	Right	CC	10.3	8.18	48	1.259	0.84	4.533	1.416
SiemensNovation	PD000383	59	Left	MLO	12.1	7.77	62	1.557	1.136	4.346	1.781
SiemensNovation	PD000383	59	Right	MLO	13.7	7.53	56	1.819	1.083	3.433	1.789
GE	PD000384	62	Left	CC	9	19.8	46	0.454	0.337	16.552	1.052
GE	PD000384	62	Right	CC	8	19.22	52	0.416	0.384	19.045	1.325
GE	PD000384	62	Left	MLO	11	13.77	55	0.799	0.464	13.876	1.482
GE	PD000384	62	Right	MLO	14	16.3	63	0.859	0.585	11.226	1.526
GE	PD000385	63	Left	CC	14	25.17	66	0.556	0.644	3.491	1.052
GE	PD000385	63	Right	MLO	15	13.9	77	1.079	0.921	4.247	1.255
GE	PD000385	63	Right	CC	18	33.03	63	0.545	0.582	4.761	1.279
GE	PD000385	63	Left	MLO	14	14.08	74	0.995	0.882	2.837	1.28
GE	PD000386	60	Left	CC	14	14.31	52	0.978	0.723	8.039	1.053
GE	PD000386	60	Right	CC	13	14.55	52	0.894	0.674	8.612	1.121
GE	PD000386	60	Left	MLO	11	7.68	66	1.431	1.005	6.605	1.26
GE	PD000386	60	Right	MLO	11	8.69	65	1.266	0.927	9.112	1.493
SiemensNovation	PD000387	49	Left	CC	5.2	10.47	55	0.497	0.464	5.377	1.053
GE	PD000387	51	Left	CC	9	23.01	51	0.391	0.315	12.826	1.235
SiemensNovation	PD000387	49	Right	CC	9.3	9.93	52	0.936	0.743	3.502	1.424
SiemensNovation	PD000387	49	Left	MLO	9.1	13.27	68	0.686	0.709	4.773	1.525
GE	PD000387	51	Right	CC	12	15.73	51	0.763	0.578	3.966	1.586
GE	PD000387	51	Left	MLO	10	12.92	75	0.774	0.815	4.065	1.795
SiemensNovation	PD000387	49	Right	MLO	15.5	11.52	63	1.346	0.774	2.551	2.093
GE	PD000387	51	Right	MLO	17	12.81	68	1.327	0.843	3.143	2.137
SiemensNovation	PD000388	50	Left	CC	9	11.76	48	0.765	0.568	5.256	1.053
SiemensNovation	PD000388	50	Right	CC	7.3	10.45	47	0.699	0.516	4.731	1.141
SiemensNovation	PD000388	50	Right	MLO	14.8	11.21	49	1.321	0.601	4.642	1.404
SiemensNovation	PD000388	50	Left	MLO	9.2	6.6	58	1.393	0.712	3.767	1.776
SiemensNovation	PD000389	63	Left	CC	8.6	25.16	48	0.342	0.316	4.09	1.054
SiemensNovation	PD000389	63	Left	MLO	7.7	13	49	0.592	0.363	8.635	1.361
SiemensNovation	PD000390	39	Left	CC	8.8	18.87	43	0.466	0.336	11.049	1.054
SiemensNovation	PD000390	39	Right	CC	10	18.24	41	0.548	0.354	6.3	1.227
SiemensNovation	PD000390	39	Left	MLO	16.5	19.28	41	0.856	0.331	14.426	1.425
SiemensNovation	PD000390	39	Left	MLO	15.1	14.55	32	1.038	0.331	13.39	1.492
SiemensNovation	PD000390	39	Right	MLO	13.3	13.22	35	1.006	0.345	7.478	1.559
Hologic	PD000391	59	Right	CC	5.91	30.46	34	0.194	0.106	16.168	1.055
Hologic	PD000391	59	Left	CC	10.86	39.35	34	0.276	0.161	19.104	1.214
Hologic	PD000391	59	Right	MLO	14.35	16.74	49	0.857	0.407	10.322	1.454
Hologic	PD000391	59	Left	MLO	16.29	14.48	42	1.125	0.396	7.548	1.496
SiemensNovation	PD000392	68	Left	MLO	8.4	7.64	49	1.099	0.687	5.285	1.055
SiemensNovation	PD000392	68	Left	CC	10.5	16.14	46	0.651	0.471	2.724	1.164
GE	PD000393	39	Left	MLO	17	18.55	41	0.917	0.288	20.847	1.057
GE	PD000393	39	Left	CC	10	29.17	35	0.343	0.184	20.564	1.27
GE	PD000393	39	Right	MLO	18	23.52	45	0.765	0.286	21.522	1.312
GE	PD000393	39	Right	CC	9	28.09	35	0.32	0.175	16.564	1.391
SiemensNovation	PD000394	67	Left	CC	8	15	48	0.533	0.43	4.571	1.057
SiemensNovation	PD000394	67	Right	CC	8.7	17.99	47	0.484	0.392	4.276	1.146
SiemensNovation	PD000394	67	Left	MLO	7.6	8.75	54	0.869	0.487	5.15	1.397
SiemensNovation	PD000394	67	Right	MLO	12.4	13.19	42	0.94	0.395	5.947	1.543
GE	PD000395	66	Right	MLO	12	12.42	56	0.966	0.619	7.777	1.057
GE	PD000395	66	Right	CC	10	23.27	52	0.43	0.388	7.214	1.071
GE	PD000395	66	Left	CC	11	27.63	49	0.398	0.322	15.442	1.116
GE	PD000395	66	Left	MLO	12	15.72	55	0.763	0.461	15.904	1.495
GE	PD000396	47	Left	CC	7	28.89	36	0.242	0.148	25.302	1.057
GE	PD000396	47	Right	MLO	14	23.72	51	0.59	0.259	14.838	1.144
GE	PD000396	47	Left	MLO	9	11.93	42	0.755	0.215	20.48	1.151
GE	PD000396	47	Right	CC	6	28.49	34	0.211	0.126	22.309	1.249
GE	PD000397	42	Right	CC	7	32.56	47	0.215	0.167	25.303	1.058
GE	PD000397	42	Left	MLO	11	16.47	50	0.668	0.26	14.26	1.094
GE	PD000397	42	Left	CC	6	27.43	49	0.219	0.18	24.072	1.121
GE	PD000397	42	Right	MLO	13	19.15	54	0.679	0.234	13.442	1.216
SiemensNovation	PD000398	67	Right	CC	9.2	11.6	49	0.793	0.601	4.787	1.058
SiemensNovation	PD000398	68	Right	CC	11.6	11.74	40	0.988	0.543	8.935	1.514
SiemensNovation	PD000398	67	Right	MLO	18.5	14.72	43	1.257	0.518	5.854	1.652
SiemensNovation	PD000398	67	Left	MLO	11	13.77	67	0.799	0.711	8.972	1.678
SiemensNovation	PD000398	67	Left	CC	7.5	16.74	55	0.448	0.465	8.341	1.712
SiemensNovation	PD000398	68	Left	CC	10.9	19.93	45	0.547	0.404	9.288	1.868
SiemensNovation	PD000398	68	Right	MLO	14.7	9.89	47	1.487	0.572	5.554	1.888
SiemensNovation	PD000398	68	Left	MLO	12.8	12.99	57	0.985	0.577	7.577	2.535
SiemensNovation	PD000399	54	Right	MLO	8.5	17.05	31	0.499	0.184	21.398	1.059
SiemensNovation	PD000399	54	Right	CC	7.9	35.18	29	0.225	0.11	20.009	1.373
SiemensNovation	PD000399	54	Left	MLO	7.7	11.34	34	0.679	0.254	19.963	1.443
SiemensNovation	PD000399	54	Left	CC	8.1	20.12	34	0.403	0.209	16.413	1.481
SiemensNovation	PD000400	73	Right	MLO	11.3	24.99	46	0.452	0.271	12.962	1.059
SiemensNovation	PD000400	73	Left	MLO	12	24.48	46	0.49	0.329	7.357	1.112
SiemensNovation	PD000400	73	Right	CC	11.8	75.88	34	0.156	0.086	5.783	1.172
SiemensNovation	PD000400	73	Left	CC	10	39.94	45	0.25	0.189	3.639	1.395
GE	PD000401	61	Left	CC	13	8.44	51	1.541	1.015	4.296	1.059
GE	PD000401	61	Right	CC	10	6.33	52	1.58	1.065	3.076	1.085
GE	PD000401	61	Right	MLO	11	6.07	66	1.812	1.262	2.812	1.099
GE	PD000401	61	Left	MLO	12	6.44	67	1.863	1.374	2.443	1.334
SiemensNovation	PD000402	60	Left	CC	8	22.68	50	0.353	0.315	4.287	1.059
SiemensNovation	PD000402	60	Left	MLO	9.1	13	56	0.7	0.498	6.486	1.449
SiemensNovation	PD000403	54	Right	CC	9.1	26.6	52	0.342	0.306	3.896	1.061
GE	PD000403	55	Left	CC	13	36.75	55	0.354	0.309	6.396	1.149
GE	PD000403	55	Right	CC	12	31.65	54	0.379	0.333	6.419	1.198
GE	PD000403	55	Left	MLO	12	15.61	62	0.769	0.41	6.218	1.247
GE	PD000403	55	Right	MLO	17	20.34	66	0.836	0.516	3.885	1.483
SiemensNovation	PD000403	54	Right	MLO	15.1	26.21	41	0.576	0.32	7.129	1.528
SiemensNovation	PD000403	54	Left	MLO	16.3	22.86	44	0.713	0.33	7.311	1.611
SiemensNovation	PD000403	54	Left	CC	16	48.99	41	0.327	0.23	4.698	1.862
GE	PD000404	54	Right	MLO	17	16.93	66	1.004	0.63	3.706	1.061
GE	PD000404	54	Right	CC	16	35.48	61	0.451	0.49	5.554	1.19
GE	PD000404	54	Left	CC	10	20.6	69	0.485	0.61	5.216	1.359
GE	PD000404	54	Left	MLO	14	12.71	72	1.101	0.856	4.103	1.438
GE	PD000405	53	Right	CC	8	25.09	45	0.319	0.241	11.159	1.061
GE	PD000405	53	Left	CC	7	19.74	49	0.355	0.317	21.351	1.081
GE	PD000405	53	Left	MLO	14	11.67	58	1.2	0.577	14.566	1.373
GE	PD000405	53	Right	MLO	14	14.47	64	0.968	0.652	7.073	1.436
GE	PD000406	56	Left	CC	10	4.09	51	2.442	1.508	2.339	1.061
GE	PD000406	56	Right	CC	11	6.13	55	1.795	1.288	2.275	1.131
GE	PD000406	56	Right	MLO	16	8.52	72	1.877	1.843	7.399	1.215
GE	PD000406	56	Left	MLO	13	7.9	72	1.645	1.535	2.088	1.449
GE	PD000407	48	Left	CC	11	17.76	45	0.619	0.412	12.458	1.061
GE	PD000407	48	Right	CC	11	16.97	47	0.648	0.459	10.467	1.121
GE	PD000407	48	Right	MLO	13	11.91	56	1.091	0.657	8.894	1.134
GE	PD000407	48	Left	MLO	12	11.57	47	1.037	0.56	11.319	1.169
GE	PD000408	47	Right	CC	12	51.8	41	0.232	0.182	22.914	1.061
GE	PD000408	47	Right	MLO	11	17.77	51	0.619	0.22	17.097	1.136
GE	PD000408	47	Right	CC	12	52.36	42	0.229	0.173	22.959	1.172
GE	PD000408	47	Right	CC	10	39.12	41	0.256	0.165	23.093	1.192
SiemensNovation	PD000409	44	Right	CC	7.7	55.98	31	0.138	0.073	20.774	1.061
SiemensNovation	PD000409	44	Right	MLO	7.6	25.18	25	0.302	0.107	15.107	1.61
SiemensNovation	PD000409	44	Left	MLO	8.1	27.41	24	0.296	0.078	12.146	1.631
SiemensNovation	PD000410	60	Right	CC	9.1	32.71	37	0.278	0.182	23.029	1.061
SiemensNovation	PD000410	60	Right	MLO	10.9	16.04	39	0.68	0.265	14.146	1.143
GE	PD000410	58	Right	CC	13	43.28	39	0.3	0.198	20.183	2.006
GE	PD000410	58	Right	CC	7	26.27	39	0.266	0.181	20.663	2.239
GE	PD000410	58	Right	MLO	16	17.23	45	0.929	0.288	10.837	2.67
GE	PD000411	42	Right	CC	14	20.87	44	0.671	0.427	11.863	1.062
GE	PD000411	42	Right	MLO	13	12.93	48	1.006	0.425	11.958	1.079
GE	PD000411	42	Left	MLO	15	13.36	48	1.122	0.449	11.357	1.124
GE	PD000411	42	Left	CC	10	13.79	42	0.725	0.421	17.059	1.162
SiemensNovation	PD000412	58	Right	CC	8.9	22.91	50	0.388	0.372	4.532	1.062
SiemensNovation	PD000412	58	Right	MLO	10.7	11.84	49	0.903	0.416	6.035	1.389
GE	PD000413	58	Right	MLO	15	14.62	58	1.026	0.645	4.466	1.062
GE	PD000413	58	Left	MLO	16	17.85	67	0.896	0.607	4.541	1.098
GE	PD000413	58	Left	CC	9	23.58	59	0.382	0.401	5.923	1.15
GE	PD000413	58	Right	CC	8	18.93	62	0.423	0.473	5.177	1.269
GE	PD000414	72	Left	CC	18	12.55	40	1.434	0.693	2.236	1.063
GE	PD000414	72	Right	MLO	14	6.82	49	2.054	0.939	3.737	1.084
GE	PD000414	72	Left	MLO	14	7.21	47	1.943	0.807	3.135	1.319
GE	PD000414	72	Right	CC	18	12	38	1.499	0.673	2.764	1.369
SiemensNovation	PD000415	57	Right	CC	7.3	13.33	49	0.548	0.456	4.012	1.063
SiemensNovation	PD000415	57	Left	CC	8.6	19.55	47	0.44	0.353	6.612	1.131
SiemensNovation	PD000415	57	Right	MLO	14.8	15.66	51	0.945	0.501	6.298	1.375
SiemensNovation	PD000415	57	Left	MLO	10.6	12.74	68	0.832	0.664	4.364	1.521
GE	PD000416	67	Right	CC	17	17.86	49	0.952	0.673	5.445	1.063
GE	PD000416	67	Left	CC	18	15.95	52	1.129	0.82	8.1	1.113
GE	PD000416	67	Right	MLO	16	9.33	62	1.715	1.16	4.163	1.341
GE	PD000416	67	Left	MLO	17	8.61	65	1.974	1.327	9.472	1.416
GE	PD000417	55	Right	CC	10	28.89	49	0.346	0.29	8.852	1.063
GE	PD000417	55	Right	MLO	12	16	49	0.75	0.327	10.473	1.064
GE	PD000417	55	Left	CC	11	24.85	47	0.443	0.349	12.169	1.104
GE	PD000417	55	Left	MLO	12	13.66	52	0.878	0.638	11.922	1.199
SiemensNovation	PD000418	54	Left	CC	13.1	22.44	48	0.584	0.463	3.677	1.063
SiemensNovation	PD000418	54	Right	CC	11.6	24.72	48	0.469	0.396	3.486	1.064
SiemensNovation	PD000418	54	Left	MLO	15	17.55	62	0.855	0.73	4.376	1.766
SiemensNovation	PD000418	54	Right	MLO	20.4	20.52	54	0.994	0.648	5.17	2.1
Hologic	PD000419	64	Right	CC	7.59	20.07	36	0.378	0.219	22.228	1.064
HologicTomo	PD000419	64	Right	CC	7.59	20.13	36	0.377	0.219	13.867	1.375
Hologic	PD000419	64	Right	MLO	12.89	13.55	35	0.951	0.256	21.887	1.455
HologicTomo	PD000419	64	Right	MLO	12.89	13.55	35	0.951	0.26	15.602	1.696
SiemensNovation	PD000420	65	Left	MLO	12.7	13.46	48	0.943	0.547	3.941	1.065
SiemensNovation	PD000420	65	Left	CC	12.3	21.71	48	0.567	0.45	3.409	1.066
SiemensNovation	PD000420	65	Right	CC	10.1	17.07	51	0.592	0.506	3.004	1.073
SiemensNovation	PD000420	65	Right	MLO	12.5	12.63	50	0.989	0.586	3.65	1.424
SiemensNovation	PD000421	58	Right	CC	9.6	43.43	33	0.221	0.121	18.465	1.065
SiemensNovation	PD000421	58	Left	MLO	8.8	18.03	35	0.488	0.164	10.972	1.119
SiemensNovation	PD000421	58	Right	MLO	8.8	17.29	36	0.509	0.164	12.356	1.139
SiemensNovation	PD000421	58	Left	CC	9.8	46.25	30	0.212	0.106	12.067	1.468
SiemensNovation	PD000422	60	Left	CC	9	14.96	50	0.602	0.51	3.811	1.065
SiemensNovation	PD000422	60	Left	CC	9	14.96	50	0.602	0.51	3.811	1.065
SiemensNovation	PD000422	60	Left	MLO	15	14.91	48	1.006	0.497	5.349	1.394
SiemensNovation	PD000422	60	Left	MLO	15	14.91	48	1.006	0.497	5.349	1.394
SiemensNovation	PD000422	60	Right	CC	10.9	11.17	56	0.976	0.858	4.877	1.468
SiemensNovation	PD000422	60	Right	CC	10.9	11.17	56	0.976	0.858	4.877	1.468
SiemensNovation	PD000422	60	Right	MLO	17.2	13.66	48	1.26	0.708	6.48	1.74
SiemensNovation	PD000422	60	Right	MLO	17.2	13.66	48	1.26	0.708	6.48	1.74
GE	PD000423	66	Left	CC	12	15.45	40	0.777	0.416	8.724	1.065
GE	PD000423	66	Right	CC	9	12.39	40	0.727	0.394	9.451	1.079
GE	PD000423	66	Right	MLO	15	12.57	50	1.194	0.524	8.11	1.137
GE	PD000423	66	Left	MLO	16	12.8	52	1.25	0.558	9.905	1.31
SiemensNovation	PD000424	72	Right	CC	6.9	17.66	50	0.391	0.349	3.485	1.066
SiemensNovation	PD000424	72	Right	MLO	8.5	13.42	51	0.633	0.392	4.507	1.415
SiemensNovation	PD000424	72	Left	CC	8.6	15.82	52	0.544	0.493	3.744	1.426
SiemensNovation	PD000424	72	Left	MLO	9.5	9.33	50	1.018	0.583	3.273	1.428
GE	PD000425	67	Left	CC	16	9.34	48	1.714	1.019	2.978	1.066
GE	PD000425	67	Right	CC	13	7.42	50	1.751	1.097	2.711	1.135
GE	PD000425	67	Left	MLO	18	10.26	62	1.754	1.285	2.937	1.203
GE	PD000425	67	Right	MLO	18	9.5	73	1.894	1.492	3.188	1.441
SiemensNovation	PD000426	60	Left	CC	9.9	13.24	50	0.748	0.592	4.334	1.066
SiemensNovation	PD000426	60	Right	CC	14.4	18.11	41	0.795	0.47	4.318	1.574
SiemensNovation	PD000426	60	Right	MLO	17	15.03	50	1.131	0.411	5.55	1.735
SiemensNovation	PD000426	60	Left	MLO	11.5	10.28	55	1.119	0.674	4.837	1.764
GE	PD000427	58	Left	CC	10	35.28	48	0.283	0.234	12.604	1.066
GE	PD000427	58	Left	MLO	14	20.8	47	0.673	0.313	10.502	1.137
GE	PD000427	57	Left	MLO	15	25.23	47	0.595	0.218	10.21	2.289
GE	PD000427	57	Left	CC	4	16.93	45	0.236	0.182	11.102	2.453
Hologic	PD000428	69	Right	MLO	15.84	18.57	37	0.853	0.242	21.764	1.067
HologicTomo	PD000428	69	Right	MLO	15.84	18.08	37	0.876	0.184	14.242	1.35
Hologic	PD000428	69	Right	CC	17.19	39.28	32	0.438	0.207	19.883	1.476
HologicTomo	PD000428	69	Right	CC	17.19	39.82	32	0.432	0.206	15.83	1.56
SiemensNovation	PD000429	56	Left	CC	7	12.32	49	0.568	0.467	3.723	1.067
SiemensNovation	PD000429	56	Right	CC	8.5	12.25	46	0.694	0.493	3.495	1.157
SiemensNovation	PD000429	56	Right	MLO	9.1	10.04	64	0.906	0.567	4.031	1.459
SiemensNovation	PD000429	55	Right	CC	10.7	13.84	46	0.773	0.536	3.016	1.551
SiemensNovation	PD000429	56	Left	MLO	14.9	16.36	54	0.911	0.489	8.047	1.687
SiemensNovation	PD000429	55	Left	CC	12.9	17.41	37	0.741	0.381	3.385	1.9
SiemensNovation	PD000429	55	Left	MLO	14	14.29	53	0.98	0.625	3.953	2.126
SiemensNovation	PD000429	55	Right	MLO	17.6	15.08	51	1.167	0.624	4.754	2.462
SiemensNovation	PD000430	65	Left	CC	8	16.18	43	0.495	0.347	9.306	1.067
SiemensNovation	PD000430	65	Left	MLO	8.1	8.53	43	0.949	0.399	8.822	1.608
SiemensNovation	PD000430	65	Right	CC	7.9	19.7	59	0.401	0.431	6.99	2.007
GE	PD000430	63	Left	CC	11	20.42	67	0.539	0.654	6.542	2.091
GE	PD000430	63	Right	CC	9	16.93	61	0.532	0.57	8.527	2.106
GE	PD000430	63	Left	MLO	14	11.66	61	1.201	0.637	6.759	2.331
GE	PD000430	63	Right	MLO	14	11.89	65	1.178	0.666	7.674	2.419
SiemensNovation	PD000430	65	Right	MLO	6.7	10.6	65	0.632	0.552	9.51	2.51
GE	PD000431	63	Left	CC	11	14.35	70	0.767	0.947	3.009	1.067
GE	PD000431	63	Right	MLO	10	8.85	71	1.13	0.968	5.671	1.166
GE	PD000431	63	Left	MLO	10	8.11	72	1.234	1.136	3.018	1.184
GE	PD000431	63	Right	CC	10	17.61	65	0.568	0.676	5.434	1.29
SiemensNovation	PD000432	67	Left	MLO	9.3	12.81	45	0.726	0.386	12.799	1.067
SiemensNovation	PD000432	67	Right	CC	7.6	20.61	43	0.369	0.28	9.39	1.088
SiemensNovation	PD000432	67	Left	CC	7.8	21.97	42	0.355	0.261	7.837	1.219
SiemensNovation	PD000432	67	Right	MLO	8.5	9.02	42	0.942	0.412	12.094	1.591
SiemensNovation	PD000433	61	Left	CC	8.7	14.25	48	0.61	0.481	3.517	1.067
SiemensNovation	PD000433	60	Right	MLO	17.9	16.89	41	1.06	0.463	9.585	1.204
SiemensNovation	PD000433	60	Right	CC	10.9	16.11	42	0.677	0.431	4.632	1.247
SiemensNovation	PD000433	60	Left	CC	12.6	17.1	39	0.737	0.414	4.588	1.25
SiemensNovation	PD000433	61	Right	CC	8.5	13.29	53	0.64	0.58	4.127	1.415
SiemensNovation	PD000433	61	Left	MLO	7.1	8.39	58	0.846	0.504	4.383	1.458
SiemensNovation	PD000433	61	Right	MLO	8.6	10.46	60	0.822	0.673	4.803	1.465
SiemensNovation	PD000433	60	Left	MLO	13.6	13.57	47	1.002	0.479	8.6	1.468
SiemensNovation	PD000434	39	Left	MLO	7.4	13.49	43	0.548	0.265	8.904	1.067
SiemensNovation	PD000434	39	Left	CC	7.7	31.75	44	0.243	0.196	6.979	1.084
SiemensNovation	PD000434	39	Right	MLO	7.5	10.31	51	0.728	0.416	16.334	1.294
SiemensNovation	PD000434	39	Right	CC	8.1	23.95	47	0.338	0.29	5.079	1.517
GE	PD000435	60	Left	MLO	15	8.16	49	1.837	0.769	6.811	1.068
GE	PD000435	60	Right	CC	13	12.56	48	1.035	0.677	6.42	1.115
GE	PD000435	60	Left	CC	13	11.52	46	1.129	0.686	6.466	1.164
GE	PD000435	60	Right	MLO	16	9.13	55	1.752	0.931	5.962	1.446
GE	PD000435	59	Right	CC	13	14.99	59	0.867	0.792	3.367	2.21
GE	PD000435	59	Right	MLO	15	13.11	69	1.144	0.965	3.516	2.484
GE	PD000435	59	Left	CC	12	13.52	54	0.888	0.704	4.69	2.506
GE	PD000435	59	Left	MLO	15	11.9	67	1.26	0.834	4.834	2.571
SiemensNovation	PD000436	51	Left	CC	9.4	6.69	48	1.404	0.92	3.831	1.068
SiemensNovation	PD000436	51	Right	CC	10.3	6.51	47	1.581	0.991	4.179	1.156
SiemensNovation	PD000436	51	Right	MLO	18.6	10.28	57	1.81	1.206	4.104	2.078
SiemensNovation	PD000436	51	Left	MLO	16.6	9.26	59	1.793	1.249	5.503	2.343
GE	PD000436	50	Left	CC	12	8.88	49	1.351	0.86	4.845	2.666
GE	PD000436	50	Right	MLO	14	10.1	77	1.386	1.485	3.789	2.787
GE	PD000436	50	Right	CC	12	8.62	53	1.392	0.988	5.76	3.09
GE	PD000436	50	Left	MLO	12	9.3	72	1.29	1.354	3.154	3.245
SiemensNovation	PD000437	49	Right	MLO	9.5	21.41	32	0.444	0.171	18.979	1.068
SiemensNovation	PD000437	51	Right	CC	14.3	67.81	21	0.211	0.065	24.715	1.146
[truncated: 13,819 more rows]
